# Supplementary material for: Metal-free cascade cyclization of alkenes toward perfluorinated oxindoles
Source: Royal Society of Chemistry journal article supplement (doi:10.1039/c5ob00454c), 2015-01-01

*Supporting Information for:*

# Metal-Free Cascade Cyclization of Alkenes toward Polyfluorinated Oxindoles

Shi Tang,<sup>\*a,c</sup> Zhi-Hao Li,<sup>a</sup> Ming-Wei Wang,<sup>a</sup> Zhi-Ping Li,<sup>a</sup> and Rui-Long Sheng<sup>\*b</sup>

<sup>a</sup> College of Chemistry and Chemical Engineering, Jishou University, Jishou 416000 (China)

<sup>b</sup> Shanghai Institute of Organic Chemistry, Chinese Academy of Sciences, 345 Lingling Road,  
Shanghai, 200032(China)

<sup>c</sup> College of Chemistry and Chemical Engineering, Central South University, Changsha 410083(China)

**General.** All manipulations of oxygen- and moisture-sensitive materials were conducted with a standard Schlenk technique under an argon atmosphere. **Flash** column chromatography was performed using silica gel (200-300 mesh) and a petroleum ether/ethyl acetate combination was used as the eluent. Analytical thin layer chromatography (TLC) was performed on Merck Kieselgel 60 F<sub>254</sub> (0.25 mm) plates. Visualization was accomplished with UV light (254 nm) and/or an aqueous alkaline KMnO<sub>4</sub> solution followed by heating.

**Apparatus.** Proton and carbon nuclear magnetic resonance spectra (<sup>1</sup>H NMR and <sup>13</sup>C NMR) were recorded on a Varian Mercury 400 or 500 (<sup>1</sup>H NMR, 400 MHz; <sup>13</sup>C NMR, 101 MHz; <sup>1</sup>H NMR, 500 MHz, <sup>13</sup>C NMR, 125 MHz,) spectrometer with solvent resonance (<sup>1</sup>H NMR, CHCl<sub>3</sub> at 7.26 ppm, and SiMe<sub>4</sub> at 0 ppm; <sup>13</sup>C NMR, CDCl<sub>3</sub> at 77.0

ppm and SiMe<sub>4</sub> at 0 ppm) as the internal standard. <sup>1</sup>H NMR data are reported as follows: chemical shift, multiplicity (s = singlet, d = doublet, t = triplet, q = quartet, quint = quintet, sext = sextet, m = multiplet, br = broad), coupling constants (Hz), and integration. <sup>19</sup>F NMR spectra were obtained by the same NMR spectrometer.

**Chemicals.** Unless otherwise noted, reagents were commercially available and were used without further purification. Anhydrous THF was distilled from sodium/benzophenone prior to use. Preparation of *N*-arylacrylamides **1** were prepared according to literature procedures.<sup>1</sup>

### 3. General Procedures

**General procedure for the synthesis of perfluorinated oxindoles.** To a mixture of *N*-arylacrylamide **1** (0.3 mmol), AIBN (2.0 equiv.), perfluoroalkyl iodide (2 equiv.) in CH<sub>3</sub>CN (2.0 mL) was added <sup>t</sup>BuOO<sup>t</sup>Bu (2.0 equiv.) dropwise, and then the resulting solution was stirred at 105 °C for 12 h. The solvent was evaporated under reduced pressure and the resulted mixture was filtered through a Florisil pad, diluted with Et<sub>2</sub>O, and washed with water and then brine. The organic layer was dried over anhydrous MgSO<sub>4</sub> and concentrated in *vacuo*. The residue was purified by flash chromatography on silica gel to afford the corresponding perfluorinated oxindole in a yield listed in Scheme 1 and 2.

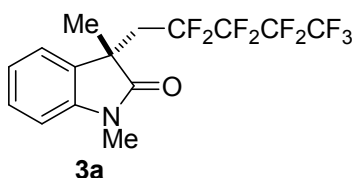

**1,3-dimethyl-3-(2,2,3,3,4,4,5,5,5-nonafluoropentyl)indolin-2-one (3a).**<sup>1a</sup> <sup>1</sup>H NMR (400 MHz, CDCl<sub>3</sub>) δ: 7.36-7.22 (m, 2H), 7.08 (t, *J* = 7.5 Hz, 1H), 6.88 (d, *J* = 8.0 Hz, 1H), 3.23 (s, 3H), 2.97-2.43 (m, 2H),

1.41 (s, 3H).

**1-ethyl-3-methyl-3-(2,2,3,3,4,4,5,5,5-**

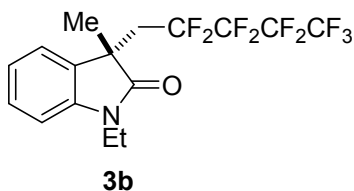

**nonafluoropentyl)indolin-2-one (3b).** Yellowish oil.  $^1\text{H}$  NMR (400 MHz,  $\text{CDCl}_3$ )  $\delta$  7.33-7.23 (m, 2H), 7.06 (t,  $J = 7.2$  Hz, 1H), 6.89 (d,  $J = 8.0$  Hz, 2H), 3.93-3.62 (m, 2H), 2.92-2.43 (m, 2H), 1.41 (s, 3H), 1.24 (t,  $J = 7.2$  Hz, 3H);  $^{13}\text{C}$  NMR (101 MHz,  $\text{CDCl}_3$ )  $\delta$  178.1, 141.7, 131.5, 128.4, 123.7, 122.4, 121.4, 125.0-114.2 (m), 44.1, 36.9 (t,  $J = 21$  Hz), 34.7, 26.0, 12.2;  $^{19}\text{F}$  NMR (376 MHz,  $\text{CDCl}_3$ )  $\delta$ : -81.0 (t,  $J = 9.4$  Hz, 3F), -108.8 (AB, m,  $J_{F-F} = 268$  Hz, 1F), -114.7 (AB, m,  $J_{F-F} = 273$  Hz, 1F), -124.6 (br, 2F), -126.0~ -125.6 (m, 2F); HRMS  $m/z$  (ESI) calcd for  $\text{C}_{16}\text{H}_{15}\text{F}_9\text{NO}$   $[\text{M}+\text{H}]^+$ : 408.1005, found: 408.1007.

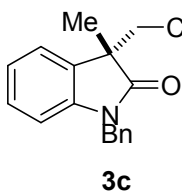

**1-Ethyl-3-methyl-3-(2,2,3,3,4,4,5,5,5-nonafluoropentyl)indolin-2-one (3c).** Yellowish oil.  $^1\text{H}$  NMR (400 MHz,  $\text{CDCl}_3$ )  $\delta$  7.34-7.13 (m, 7H), 7.04 (t,  $J = 8.4$  Hz, 1H), 6.75 (d,  $J = 8.0$  Hz, 2H), 4.94 (d,  $J = 3.6$  Hz, 2H), 2.93 (dd,  $J = 35.6, 14.4$  Hz, 1H), 2.65 (dd,  $J = 31.2, 15.2, 8.0$  Hz, 1H), 1.48 (s, 3H);  $^{13}\text{C}$  NMR (101 MHz,  $\text{CDCl}_3$ )  $\delta$  178.6, 141.9, 135.7, 131.2, 127.3, 123.6, 122.6, 126.0-114.3 (m), 109.5, 44.3, 44.0, 36.6 (t,  $J = 20.4$  Hz), 26.5;  $^{19}\text{F}$  NMR (376 MHz,  $\text{CDCl}_3$ )  $\delta$ : -81.1 (t,  $J = 8.1$  Hz, 3F), -107.6 (d,  $J_{F-F} = 264$  Hz, 1F), -114.3 (d,  $J_{F-F} = 270$  Hz, 1F), -124.5 (br, 2F), -125.4~ -126.1 (m, 2F); HRMS  $m/z$  (ESI) calcd for  $\text{C}_{21}\text{H}_{17}\text{F}_9\text{NO}$   $[\text{M}+\text{H}]^+$ : 470.1161, found: 470.1163.

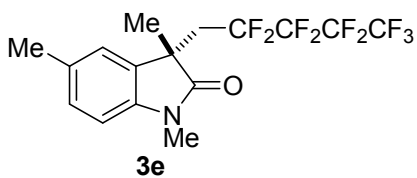

**1,3,5-trimethyl-3-(2,2,3,3,4,4,5,5,5-nonafluoropentyl)indolin-2-one (3e).** Yellowish solid. m.p. 62-63  $^\circ\text{C}$ .  $^1\text{H}$  NMR (400 MHz,  $\text{CDCl}_3$ )  $\delta$  7.12-7.05 (m, 2H), 6.76 (d,  $J = 8.4$  Hz, 1H), 3.21 (s, 3H), 2.85 (dd,  $J = 35.2, 15.6$  Hz, 1H), 2.56 (ddd,  $J = 31.2, 15.2, 8.0$  Hz, 1H), 2.34 (s, 3H), 1.40 (s, 3H);  $^{13}\text{C}$  NMR (101 MHz,  $\text{CDCl}_3$ )  $\delta$  178.5, 140.4, 132.2, 131.3, 128.8, 124.4, 125.0-114.1 (m), 108.1, 44.2, 36.9 (t,  $J = 23$  Hz), 26.5, 25.9, 21.1;  $^{19}\text{F}$  NMR (376 MHz,  $\text{CDCl}_3$ )  $\delta$ : -81.0 (t,  $J = 8.0$  Hz, 3F), -108.9 (d,  $J_{F-F} = 272$  Hz, 1F), -114.7 (d,  $J_{F-F} = 273$  Hz, 1F), -124.6 (br, 2F), -125.0~ -126.2 (m, 2F); HRMS  $m/z$  (ESI) calcd for  $\text{C}_{16}\text{H}_{15}\text{F}_9\text{NO}$   $[\text{M}+\text{H}]^+$ : 408.1005, found: 408.1002.

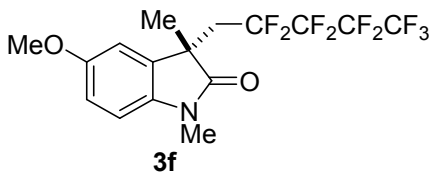

**5-methoxy-1,3-dimethyl-3-(2,2,3,3,4,4,5,5,5-nonafluoropentyl)indolin-2-one (3f).**

**nonafluoropentyl)indolin-2-one (3f).** Yellowish oil,  $^1\text{H}$  NMR (400 MHz,  $\text{CDCl}_3$ )  $\delta$  6.92-6.74(m, 3H), 3.79 (s, 3H), 3.21 (s, 3H), 2.86 (dd,  $J = 35.0, 15.6$  Hz, 1H), 2.56 (ddd,  $J = 30.8, 15.6, 8.4$  Hz, 1H), 1.41 (s, 3H);  $^{13}\text{C}$  NMR (101 MHz,  $\text{CDCl}_3$ )  $\delta$  178.2, 156.4, 136.3, 132.7, 125.0-114.1 (m), 112.5, 111.3, 108.7, 55.8, 44.6, 36.6 (t,  $J = 31.1$  Hz), 26.5, 25.9;  $^{19}\text{F}$  NMR (376 MHz,  $\text{CDCl}_3$ )  $\delta$ : -81.0 (t,  $J = 8.0$  Hz, 3F), -108.8 (d,  $J_{F-F} = 268$  Hz, 1F), -114.9 (d,  $J_{F-F} = 273$  Hz, 1F), -124.6 (br, 2F), -125.2~ -126.3 (m, 2F); HRMS  $m/z$  (ESI) calcd for  $\text{C}_{16}\text{H}_{15}\text{F}_9\text{NO}_2$   $[\text{M}+\text{H}]^+$ : 424.0954, found: 424.0926.

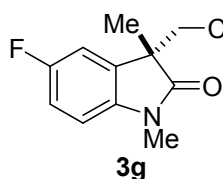

**5-fluoro-1,3-dimethyl-3-(2,2,3,3,4,4,5,5,5-nonafluoropentyl)indolin-2-one (3g).** yellowish solid. m.p. 78-79 °C.  $^1\text{H}$  NMR (400 MHz,  $\text{CDCl}_3$ )  $\delta$  7.06-6.95 (m, 2H), 6.93-6.75(m, 1H), 3.22 (s, 3H), 2.87 (dd,  $J = 34.8$  Hz, 15.2 Hz, 1H), 2.56 (ddd,  $J = 30.8, 15.6, 8.0$  Hz, 1H), 1.42 (s, 3H);  $^{13}\text{C}$  NMR (101 MHz,  $\text{CDCl}_3$ )  $\delta$  178.2, 159.3 (d,  $J = 241.9$  Hz), 138.8, 132.9, 125.0-114.2 (m). 114.8 (d,  $J = 27.6$  Hz), 111.8 (d,  $J = 25.5$  Hz), 109.0 (d,  $J = 8.2$  Hz), 44.6, 36.9 (t,  $J = 20.2$  Hz), 26.6, 25.7;  $^{19}\text{F}$  NMR (376 MHz,  $\text{CDCl}_3$ )  $\delta$ : -81.0 - 81.0 (t,  $J = 8.0$  Hz, 3F), -108.7 (d,  $J_{F-F} = 273$  Hz, 1F), -114.6 (d,  $J_{F-F} = 266.9$  Hz, 1F), -120.4 (s, 1F), -124.6 (br, 2F), -125.2~ -126.2 (m, 2F); HRMS  $m/z$  (ESI) calcd for  $\text{C}_{16}\text{H}_{12}\text{F}_{10}\text{NO}$   $[\text{M}+\text{H}]^+$  412.0754, found: 412.0758.

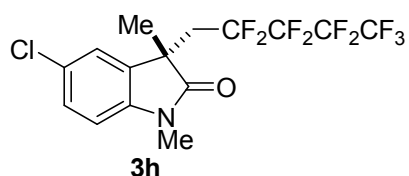

**chloro-1,3-dimethyl-3-(2,2,3,3,4,4,5,5,5-nonafluoropentyl)indolin-2-one (3h).** Yellowish solid. m.p. 73-74 °C.  $^1\text{H}$  NMR (400 MHz,  $\text{CDCl}_3$ )  $\delta$  7.31-7.21 (m, 2H), 6.79(d,  $J = 8.4$  Hz, 1H), 3.20 (s, 3H), 2.87 (dd,  $J = 35.2, 15.6$  Hz, 1H), 2.65(ddd,  $J = 30.8, 15.6, 8.4$  Hz, 1H), 1.41 (s, 3H);  $^{13}\text{C}$  NMR (101 MHz,  $\text{CDCl}_3$ )  $\delta$  178.0, 141.4, 132.9, 128.1, 125.0-114.0 (m). 124.1, 109.5, 44.4, 36.9 (t,  $J = 20.2$  Hz), 26.6, 25.8;  $^{19}\text{F}$  NMR (376 MHz,  $\text{CDCl}_3$ )  $\delta$ : -81.0 (t,  $J = 8.0$  Hz, 3F), -108.7 (d,  $J_{F-F} = 273$  Hz, 1F), -114.6 (d,  $J_{F-F} = 266.9$  Hz, 1F), -124.6 (br, 2F), -125.2~ -126.2 (m, 2F); HRMS  $m/z$  (ESI) calcd for  $\text{C}_{15}\text{H}_{11}\text{ClF}_9\text{NO}$   $[\text{M}+\text{H}]^+$  428.0459, found: 428.0462.

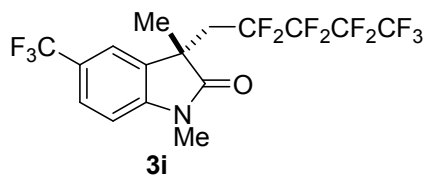

**1,3-dimethyl-3-(2,2,3,3,4,4,5,5,5-nonafluoropentyl)-**

**5-(trifluoromethyl)indolin-2-one (3i).** Yellowish solid. m.p. 92-93 °C. <sup>1</sup>H NMR (400 MHz, CDCl<sub>3</sub>) δ 7.59 (d, *J* = 8.4 Hz), 7.50 (s, 1H), 6.96(d, *J* = 8.4 Hz, 1H), 3.27 (s, 3H), 2.92 (dd, *J* = 35.2 Hz, 15.6 Hz, 1H), 2.63 (ddd, *J* = 30.8, 15.6, 8.4 Hz, 1H), 1.45 (s, 3H); <sup>13</sup>C NMR (101 MHz, CDCl<sub>3</sub>) δ 178.4, 145.8, 131.7, 126.3 (q, *J* = 3.8 Hz), 124.0 (q, *J* = 32.9 Hz), 124.4 (q, *J* = 272.8 Hz), 124.0-114.0 (m). 109.5, 44.1, 36.9 (t, *J* = 20.1 Hz), 26.6, 25.7; <sup>19</sup>F NMR (282 MHz, CDCl<sub>3</sub>) δ: -61.3 (t, *J* = 8.0 Hz, 3F), -81.0 (t, *J* = 8.0 Hz, 3F), -108.5 (d, *J*<sub>F-F</sub> = 274 Hz, 1F), -114.7 (d, *J*<sub>F-F</sub> = 272 Hz, 1F), -124.6 (br, 2F), -125.3~ -127.0 (m, 2F); HRMS *m/z* (ESI) calcd for C<sub>16</sub>H<sub>12</sub>F<sub>12</sub>NO [M+H]<sup>+</sup>: 462.0722, found: 462.0726.

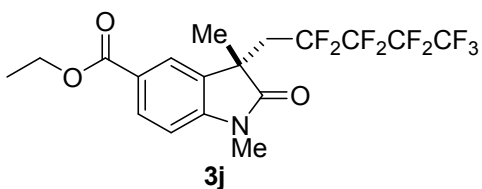

**Ethyl 1,3-dimethyl-3-(2,2,3,3,4,4,5,5,5-nonafluoropentyl)-2-oxoindoline-5-**

**carboxylate (3j).** Yellowish oil, <sup>1</sup>H NMR (400 MHz, CDCl<sub>3</sub>) δ 8.06 (dd, *J* = 8.4, 1.6 Hz, 1H),

7.93 (s, 1H), 6.91(d, *J* = 8.4 Hz, 1H), 3.27 (s, 3H), 4.36 (q, *J* = 7.2 Hz, 2H), 2.91 (dd, *J* = 35.2, 15.6 Hz, 1H), 2.64 (ddd, *J* = 30.8, 15.6, 8.4 Hz, 1H), 1.44 (s, 3H), 1.39 (t, *J* = 7.2 Hz, 3H); <sup>13</sup>C NMR (101 MHz, CDCl<sub>3</sub>) δ 178.8, 166.2, 146.8, 131.1, 125.0, 124.8, 125.0-114.0 (m), 108.0, 61.0, 43.9, 36.2 (t, *J* = 20.2 Hz), 26.5, 25.8, 14.4; <sup>19</sup>F NMR (282 MHz, CDCl<sub>3</sub>) δ: -81.0 (t, *J* = 8.0 Hz, 3F), -108.7 (d, *J*<sub>F-F</sub> = 265 Hz, 1F), -114.7 (d, *J*<sub>F-F</sub> = 268 Hz, 1F), -124.5 (br, 2F), -125.2~ -126.9 (m, 2F); HRMS *m/z* (ESI) calcd for C<sub>18</sub>H<sub>17</sub>F<sub>9</sub>NO<sub>3</sub> [M+H]<sup>+</sup>: 466.1060, found: 466.1063.

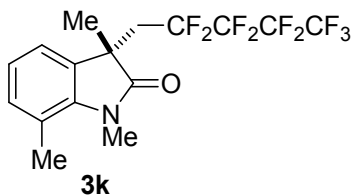

**Ethyl 1,3,7-trimethyl-3-(2,2,3,3,4,4,5,5,5-nonafluoropentyl)indolin-2-one (3k).** Yellowish solid.

m.p. 115-116 °C. <sup>1</sup>H NMR (500 MHz, CDCl<sub>3</sub>) δ 7.10 (d, *J* = 7.5 Hz, 1H), 7.04 (d, *J* = 7.5 Hz, 1H), 6.96 (t, *J* = 7.5 Hz,

1H), 3.52 (s, 3H), 2.89 (dd, *J* = 35.2, 15.6 Hz, 1H), 2.65-2.50 (m, 4H), 1.40 (s, 3H); <sup>13</sup>C NMR (125 MHz, CDCl<sub>3</sub>) δ 179.2, 140.4, 132.0, 131.7, 125.0-114.0 (m), 122.3, 121.3, 119.9, 43.3, 36.0 (t, *J* = 20.3 Hz), 29.7, 26.3, 18.9; <sup>19</sup>F NMR (470 MHz, CDCl<sub>3</sub>) δ: -81.1 (t, *J* = 8.0 Hz, 3F), -109.0 (A-B, *J*<sub>F-F</sub> = 269 Hz, 1F), -114.7 (A-B, *J*<sub>F-F</sub> = 272 Hz, 1F), -124.6 (br, 2F), -125.2~ -126.7 (m, 2F); HRMS *m/z* (ESI) calcd for C<sub>16</sub>H<sub>15</sub>F<sub>9</sub>NO [M+H]<sup>+</sup>:

408.1005, found: 408.1001.

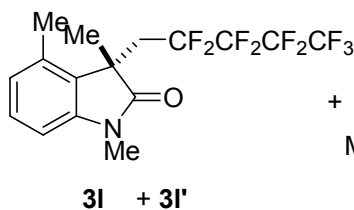

**Mixture of 1,3,4-trimethyl-3-(2,2,3,3,4,4,5,5,5-nonafluoropentyl)indolin-2-one (3I) and 1,3,6-trimethyl-3-(2,2,3,3,4,4,5,5,5-nonafluoropentyl)indolin-2-one (3I').** 3I:3I' = 0.9:1, <sup>1</sup>H NMR (400 MHz, CDCl<sub>3</sub>) δ 7.23-6.68 (m, 3H), 3.21(s, 3H), 3.10-2.48 (m, 2H), 2.36(s, 3H), 1.46(s, 1.6H), 1.40(s, 1.4H); <sup>13</sup>C NMR (101 MHz, CDCl<sub>3</sub>) δ 179.6, 179.3, 143.8, 143.6, 139.4, 135.5, 129.1, 129.0, 125.9, 124.1, 125.0-114.0 (m), 123.9, 122.2, 110.2, 107.0, 45.2, 44.7, 37.7 (t, *J* = 20.4Hz), 36.7 (t, *J* = 20.2Hz), 27.2, 26.6, 24.5, 24.1, 22.5, 18.9; <sup>19</sup>F NMR (282 MHz, CDCl<sub>3</sub>) δ: -81.0 (t, *J* = 12.4 Hz, 3F), -107.9—117.9 (m, 2F), -124.7 (br, 2F), -125.1~ -126.7 (m, 2F); HRMS *m/z* (ESI) C<sub>16</sub>H<sub>15</sub>F<sub>9</sub>NO [M+H]<sup>+</sup>:408.1005, found: 408.1004

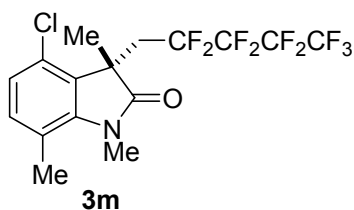

**Ethyl 4-chloro-1,3,7-trimethyl-3-(2,2,3,3,4,4,5,5,5-nonafluoropentyl)indolin-2-one (3m).** Yellowish solid. m.p. 98-99 °C. <sup>1</sup>H NMR (400 MHz, CDCl<sub>3</sub>) δ 6.97 (d, *J* = 8.4 Hz, 1H), 6.89 (d, *J* = 8.0 Hz, 1H), 3.51 (s, 3H), 3.13 (ddd, *J* = 31.2, 15.2, 7.6 Hz, 1H), 2.85 (dd, *J* = 35.2, 15.2 Hz, 1H), 2.56 (s, 3H), 1.51 (s, 3H); <sup>13</sup>C NMR (101 MHz, CDCl<sub>3</sub>) δ 178.8, 142.2, 133.4, 129.0, 127.9, 114.0-125.0 (m), 123.4, 118.8, 44.5, 36.1, 36.0 (t, *J* = 20.1 Hz), 29.9, 22.9, 16.9; <sup>19</sup>F NMR (376 MHz, CDCl<sub>3</sub>) δ: -81.0 (t, *J* = 8.0 Hz, 3F), -112.7 (A-B, *J*<sub>F-F</sub> = 270 Hz, 1F), -115.6 (A-B, *J*<sub>F-F</sub> = 272 Hz, 1F), -124.7 (br, 2F), -125.2~ -126.7 (m, 2F); HRMS *m/z* (ESI) calcd for C<sub>16</sub>H<sub>14</sub>ClF<sub>9</sub>NO [M+H]<sup>+</sup>: 442.0615, found: 442.0618.

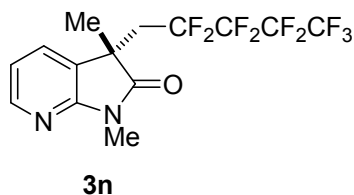

**1,3-dimethyl-3-(2,2,3,3,4,4,5,5,5-nonafluoropentyl)-1H-pyrrolo[2,3-b]pyridin-2(3H)-one (3n).** Yellowish solid. m.p. 83-84 °C. <sup>1</sup>H NMR (400 MHz, CDCl<sub>3</sub>) δ 8.23 (dd, *J* = 4.8, 1.2 Hz, 1H), 7.23-7.09 (m, 2H), 3.25(s, 3H), 2.94-2.77 (m, 2H), 1.46 (s, 3H); <sup>13</sup>C NMR (101 MHz, CDCl<sub>3</sub>) δ 176.9, 152.2, 143.0, 137.9, 114.0-

125.0 (m), 123.2, 114.7, 46.2, 36.1 (t,  $J = 20.3\text{Hz}$ ), 26.2, 24.1;  $^{19}\text{F}$  NMR (282 MHz,  $\text{CDCl}_3$ )  $\delta$ : -81.0 (t,  $J = 8.0$  Hz, 3F), -109.8 (A-B,  $J_{F-F} = 274$  Hz, 1F), -113..5 (A-B,  $J_{F-F} = 261$  Hz, 1F), -124.5 (br, 2F), -125.2~ -126.7 (m, 2F); HRMS  $m/z$  (ESI) calcd for  $\text{C}_{14}\text{H}_{12}\text{F}_9\text{N}_2\text{O}$   $[\text{M}+\text{H}]^+$ : 395.0801, found: 395.0798.

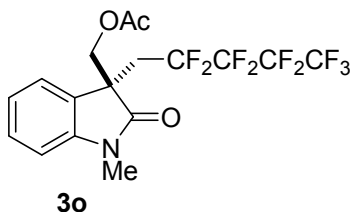

**(1-Methyl-3-(2,2,3,3,4,4,5,5,5-nonafluoropentyl)-2-oxoindolin-3-yl)methyl acetate (3o).** Yellowish oil,  $^1\text{H}$  NMR (400 MHz,  $\text{CDCl}_3$ )  $\delta$  7.38-7.24 (m, 2H), 7.07 (d,  $J = 7.6$  Hz, 1H), 6.86 (d,  $J = 8.0$  Hz, 1H), 4.38 (d,  $J = 10.8$  Hz, 1H), 4.07 (d,  $J = 10.8$  Hz, 1H), 2.99-2.69 (m, 2H), 1.97 (s, 3H);  $^{13}\text{C}$  NMR (101 MHz,  $\text{CDCl}_3$ )  $\delta$  175.2, 170.0, 143.5, 129.3, 126.9, 124.8-114.0 (m), 122.7, 108.6, 67.4, 47.9, 33.1 (t,  $J = 20.0$  Hz), 36.5, 20.5;  $^{19}\text{F}$  NMR (376 MHz,  $\text{CDCl}_3$ )  $\delta$ : -81.1 (t,  $J = 3.4$  Hz, 3F), -108.1 (A-B,  $J_{F-F} = 272$  Hz, 1F), -114.1 (A-B,  $J_{F-F} = 276$  Hz, 1F), -124.4 (br, 2F), -125.2~ -126.8 (m, 2F); HRMS  $m/z$  (ESI) calcd for  $\text{C}_{17}\text{H}_{15}\text{F}_9\text{NO}_3$   $[\text{M}+\text{H}]^+$ : 452.0903, found: 452.0907.

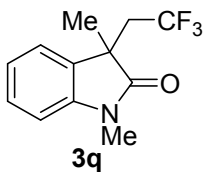

**1,3-Dimethyl-3-(2,2,2-trifluoroethyl)indolin-2-one (3q).**<sup>1a</sup>  $^1\text{H}$  NMR (500 MHz,  $\text{CDCl}_3$ )  $\delta$  7.36-7.26 (m, 2H), 7.11 (t,  $J = 7.5$  Hz, 1H), 6.90 (d,  $J = 7.5$  Hz, 1H), 3.26 (s, 3H), 2.90-2.78(m, 1H), 2.72-2.63 (m, 1H), 1.42 (s, 3H).

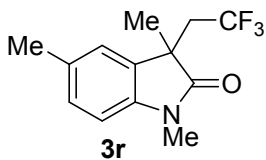

**1,3,5-Trimethyl-3-(2,2,2-trifluoroethyl)indolin-2-one (3r).**<sup>1b</sup>  $^1\text{H}$  NMR (500 MHz,  $\text{CDCl}_3$ )  $\delta$  7.15-7.08 (m, 2H), 6.79(d,  $J = 8.0$  Hz, 1H), 3.23 (s, 3H), 2.87-2.77 (m, 1H), 2.70-2.58 (m, 1H), 2.37 (s, 3H), 1.41 (s, 3H).

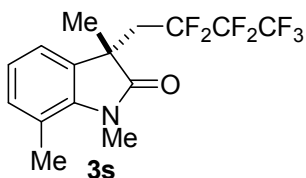

**3-(2,2,3,3,4,4,4-Heptafluorobutyl)-1,3,7-trimethylindolin-2-one (3s).** Yellowish solid. m.p. 87-88 °C.  $^1\text{H}$  NMR (500 MHz,  $\text{CDCl}_3$ )  $\delta$  7.11 (d,  $J = 7.5\text{Hz}$ , 2H), 7.07 (d,  $J = 7.5$  Hz, 1H), 6.98 (d,  $J = 7.5$  Hz, 1H), 3.53 (s, 3H), 2.89 (dd,  $J = 35.5$ , 15.5 Hz, 1H), 2.65-2.49 (m, 4H), 1.41(s, 3H);  $^{13}\text{C}$  NMR (125 MHz,  $\text{CDCl}_3$ )  $\delta$  179.3,

140.6, 132.8, 131.8, 122.5, 125.0-114.0 (m), 121.4, 120.1, 43.5, 36.9 (t,  $J=20.5$  Hz), 26.4, 24.8, 19.1;  $^{19}\text{F}$  NMR (470 MHz,  $\text{CDCl}_3$ )  $\delta$ : -80.3 (t,  $J = 8.0$  Hz, 3F), -109.6 (A-B,  $J_{F-F} = 270$  Hz, 1F), -115.6 (A-B,  $J_{F-F} = 271$  Hz, 1F), -127.2~ -128.6 (m, 2F); HRMS  $m/z$  (ESI) calcd for  $\text{C}_{15}\text{H}_{15}\text{F}_7\text{NO}$   $[\text{M}+\text{H}]^+$ : 358.1037, found: 358.1039.

### 5-Methoxy-1,3-dimethyl-3-

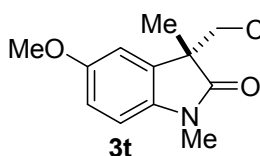

### (2,2,3,3,4,4,5,5,6,6,7,7,7-tridecafluoroheptyl)indolin-2-one (3t).

Yellowish solid. m.p. 92-93 °C.  $^1\text{H}$  NMR (400 MHz,  $\text{CDCl}_3$ )  $\delta$  6.92-6.75 (m, 3H), 3.78(s, 3H), 3.21(s,3H), 2.86 (dd,  $J = 35.2, 14.5$  Hz, 1H), 2.56 (ddd,  $J = 29.0, 14.5, 7.5$ Hz, 1H), 1.40 (s, 3H);  $^{13}\text{C}$  NMR (101 MHz,  $\text{CDCl}_3$ )  $\delta$  178.3, 136.0, 136.3, 132.7, 125.0-108.0 (m), 121.4, 112.5, 108.7, 55.8, 44.6, 36.9 (t,  $J = 20.2$  Hz), 26.5, 25.9;  $^{19}\text{F}$  NMR (376 MHz,  $\text{CDCl}_3$ )  $\delta$ : -80.8 (t,  $J = 8.0$  Hz, 3F), -108.6 (A-B,  $J_{F-F} = 268$  Hz, 1F), -114.9 (A-B,  $J_{F-F} = 262$  Hz, 1F), -121.7 (br, 2F), -122.9 (br, 2F), -123.7 (br, 2F), -125.2~ -126.7 (m, 2F); HRMS  $m/z$  (ESI) calcd for  $\text{C}_{18}\text{H}_{15}\text{F}_3\text{NO}_2$   $[\text{M}+\text{H}]^+$ : 524.0890, found: 524.0893.

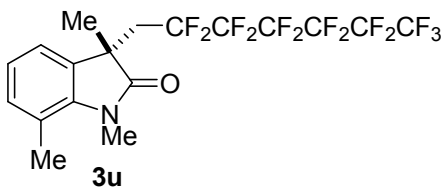

### 1,3,7-Trimethyl-3-(2,2,3,3,4,4,5,5,6,6,7,7,7-tridecafluoroheptyl)indolin-2-one (3u).

Yellowish solid. m.p. 83-84 °C.  $^1\text{H}$  NMR (400 MHz,  $\text{CDCl}_3$ )  $\delta$  7.15-6.90 (m, 3H), 3.51(s, 3H), 2.86 (dd,  $J = 35.2, 15.2$  Hz, 1H), 2.6-2.45 (m, 4H), 1.39 (s, 3H);  $^{13}\text{C}$  NMR (101 MHz,  $\text{CDCl}_3$ )  $\delta$  179.3, 140.5, 132.1, 131.8, 125.0-107.0 (m), 122.4, 121.3, 120.1, 43.5, 37.2 (t,  $J = 20.4$  Hz), 26.3, 25.3, 18.9;  $^{19}\text{F}$  NMR (282 MHz,  $\text{CDCl}_3$ )  $\delta$ : -80.8 (t,  $J = 8.0$  Hz, 3F), -108.6 (A-B,  $J_{F-F} = 268$  Hz, 1F), -114.4 (A-B,  $J_{F-F} = 262$  Hz, 1F), -121.7 (br, 2F), -122.8 (br, 2F), -123.7 (br, 2F), -125.3~ -126.8 (m, 2F); HRMS  $m/z$  (ESI) calcd for  $\text{C}_{18}\text{H}_{15}\text{F}_{13}\text{NO}$   $[\text{M}+\text{H}]^+$ : 508.0941, found: 508.0937.

### 1,3-Dimethyl-3-(2,2,3,3,4,4,5,5,6,6,7,7,7-tridecafluoroheptyl)-1H-pyrrolo[2,3-

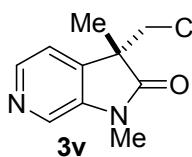

### c]pyridin-2(3H)-one (3v). Yellowish oil. $^1\text{H}$ NMR (500 MHz, $\text{CDCl}_3$ ) $\delta$ 8.26 (dd, $J = 5.5, 8.4$ Hz, 1H),



7.55 (d,  $J = 7.0$  Hz, 1H), 7.02 (dd,  $J = 7.5, 5.0$  Hz, 1H), 3.36 (s, 3H), 2.90 (dd,  $J = 35.5, 15.5$  Hz, 1H), 2.63 (ddd,  $J = 31.0, 15.5, 8.0$  Hz, 1H), 1.49 (s, 3H);  $^{13}\text{C}$  NMR (125 MHz,  $\text{CDCl}_3$ )  $\delta$  178.2, 156.2, 147.5, 131.2, 125.7, 125.0-109.0 (m), 118.2.8, 43.9, 36.7 (t,  $J = 20.4$  Hz), 25.6, 25.1;  $^{19}\text{F}$  NMR (470 MHz,  $\text{CDCl}_3$ )  $\delta$ : -80.8 (t,  $J = 8.0$  Hz, 3F), -108.3 (A-B,  $J_{F-F} = 272$  Hz, 1F), -114.0 (A-B,  $J_{F-F} = 270$  Hz, 1F), -121.7 (br, 2F), -122.9 (br, 2F), -123.7 (br, 2F), -125.4~ -126.9 (m, 2F); HRMS  $m/z$  (ESI) calcd for  $\text{C}_{20}\text{H}_{15}\text{F}_{13}\text{N}_2\text{O}$   $[\text{M}+\text{H}]^+$ : 495.0737, found: 495.0734.

**3-(2,2,3,3,4,4,5,5,6,6,7,7,8,8,9,9,9-Heptadecafluorononyl)-1,3,7-trimethylindolin-2-**

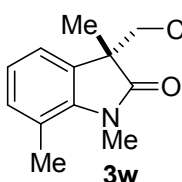

**one (3w).** Yellowish solid. m.p. 101-102 °C.  $^1\text{H}$  NMR (500 MHz,  $\text{CDCl}_3$ )  $\delta$  7.15-6.93 (m, 3H), 3.53 (s, 3H), 2.90 (dd,  $J = 35.5, 15.5$  Hz, 1H), 2.68-2.50 (m, 4H), 1.41 (s, 3H);  $^{13}\text{C}$  NMR (125 MHz,  $\text{CDCl}_3$ )  $\delta$  179.3, 140.6, 132.2, 131.8, 125.0-108.0 (m), 122.4, 121.4, 120.3, 120.1, 120.0-108.0 (m), 43.5, 37.2 (t,  $J = 20.2$  Hz), 29.8, 26.4, 19.0;  $^{19}\text{F}$  NMR (470 MHz,  $\text{CDCl}_3$ )  $\delta$ : -80.9 (t,  $J = 8.0$  Hz, 3F), -108.9 (A-B,  $J_{F-F} = 269$  Hz, 1F), -114.0 (A-B,  $J_{F-F} = 270$  Hz, 1F), -121.8 (br, 2F), -122.1 (br, 4F), -122.9 (br, 2F), -123.8 (br, 2F), -126.1~ -126.8 (m, 2F); HRMS  $m/z$  (ESI) calcd for  $\text{C}_{20}\text{H}_{15}\text{F}_{17}\text{NO}$   $[\text{M}+\text{H}]^+$ : 608.0877, found: 608.0879.

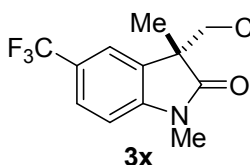

**3-(2,2,3,3,4,4,5,5,6,6,7,7,8,8,9,9,10,10,11,11,11-Trifluoroundecyl)-1,3-dimethyl-5-(trifluoromethyl)indolin-2-one (3x).** Yellowish solid. m.p. 121-123 °C.  $^1\text{H}$  NMR (500 MHz,  $\text{CDCl}_3$ )  $\delta$  7.63 (dd,  $J = 8.0, 6.0$  Hz, 1H), 7.54 (s, 1H), 6.99 (d,  $J = 8.5$  Hz), 3.30 (s, 3H), 2.96 (dd,  $J = 35.5, 15.5$  Hz, 1H), 2.68 (ddd,  $J = 30.5, 15.5, 8.0$  Hz, 1H), 1.40 (s, 3H);  $^{13}\text{C}$  NMR (125 MHz,  $\text{CDCl}_3$ )  $\delta$  178.4, 145.7, 131.7, 126.3 (q,  $J = 4.0$  Hz), 125.1 (q,  $J = 32.5$  Hz), 125.0-108.0 (m), 121.4, 120.7, 44.1, 37.1 (t,  $J = 20.4$  Hz), 26.6, 25.8;  $^{19}\text{F}$  NMR (470 MHz,  $\text{CDCl}_3$ )  $\delta$ : -62.0 (s, 3F), -80.7 (t,  $J = 8.0$  Hz, 3F), -108.4 (A-B,  $J_{F-F} = 270$  Hz, 1F), -114.0 (A-B,  $J_{F-F} = 272$  Hz, 1F), -121.6 (br, 2F), 121.6-122.2 (m, 8F),

-122.8 (br, 4F), -123.9 (br, 2F), -126.1~ -126.8 (m, 2F); HRMS  $m/z$  (ESI) calcd for  $C_{22}H_{12}F_{24}NO$   $[M+H]^+$ : 762.0631, found: 762.0628.

1. (a) Tang, X.-J., Thomason, C. S. and Dolbier Jr., W. R. *Org. Lett.* **2014**, *16*, 4594. (b)  
(b) Mu, X.; Wu, T.; Wang, H.; Guo, Y.; Liu, G. *J. Am. Chem. Soc.*, **2012**, *134*, 878.

## 1 Copies of $^1H$ NMR and $^{13}C$ NMR spectra

1,3-dimethyl-3-(2,2,3,3,4,4,5,5,5-nonafluoropentyl)indolin-2-one (3a)

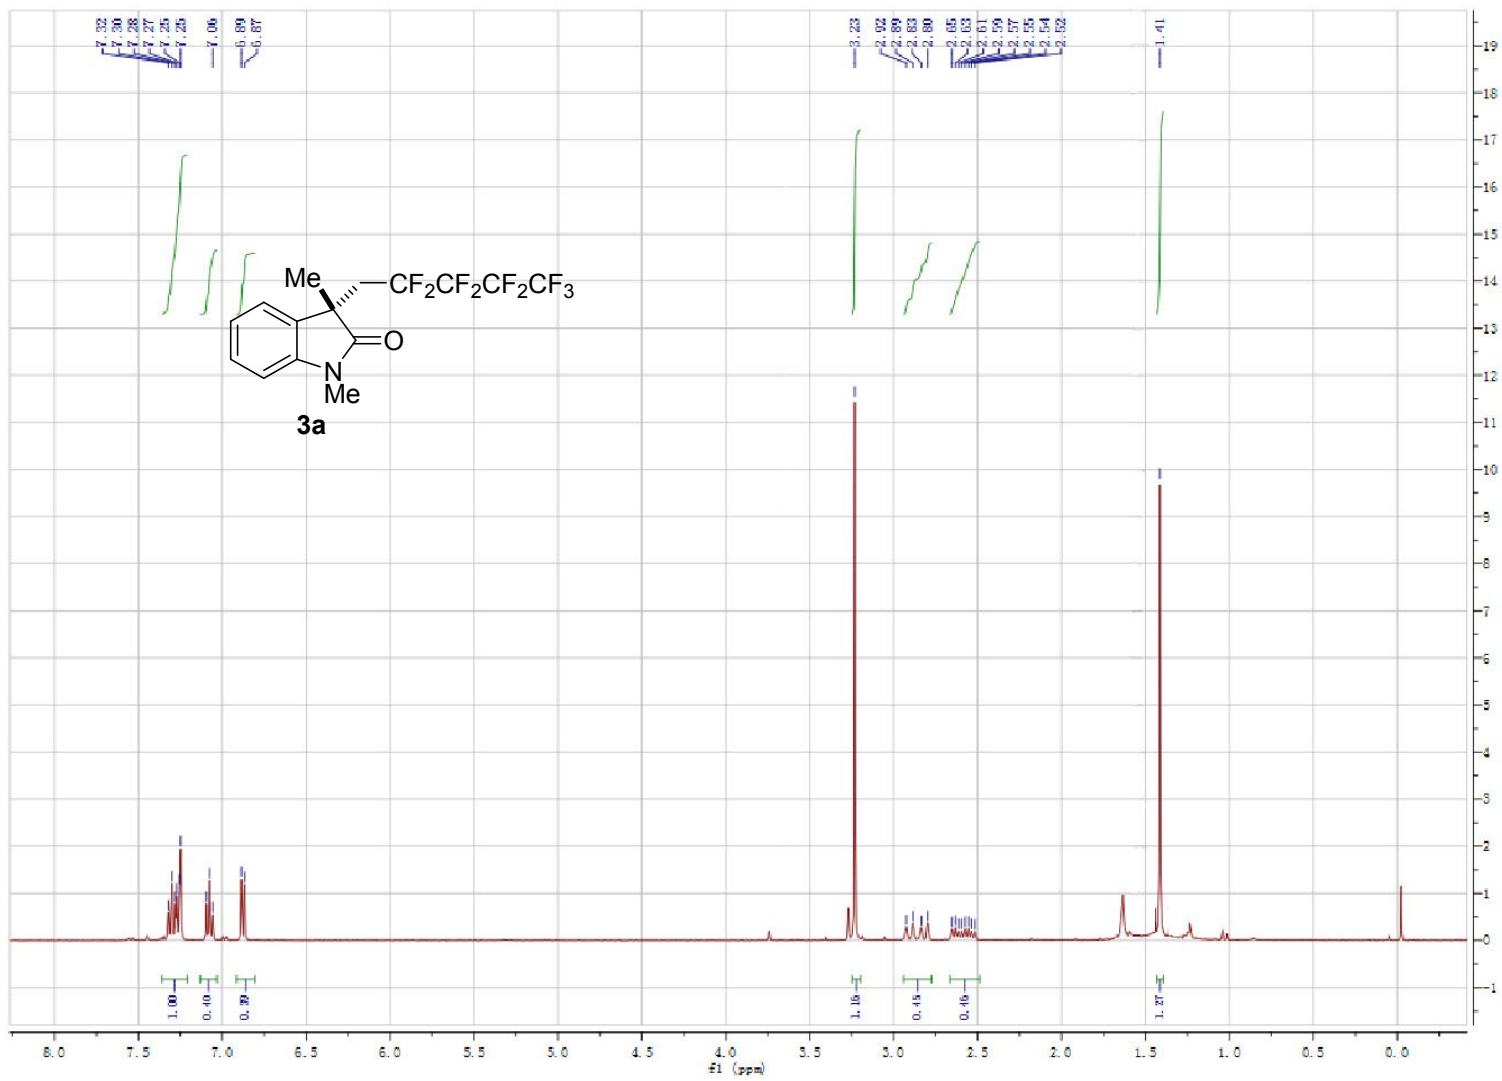

### 3-dimethyl-3-(2,2,3,3,4,4,5,5,5-nonafluoropentyl)indolin-2-one (3a)

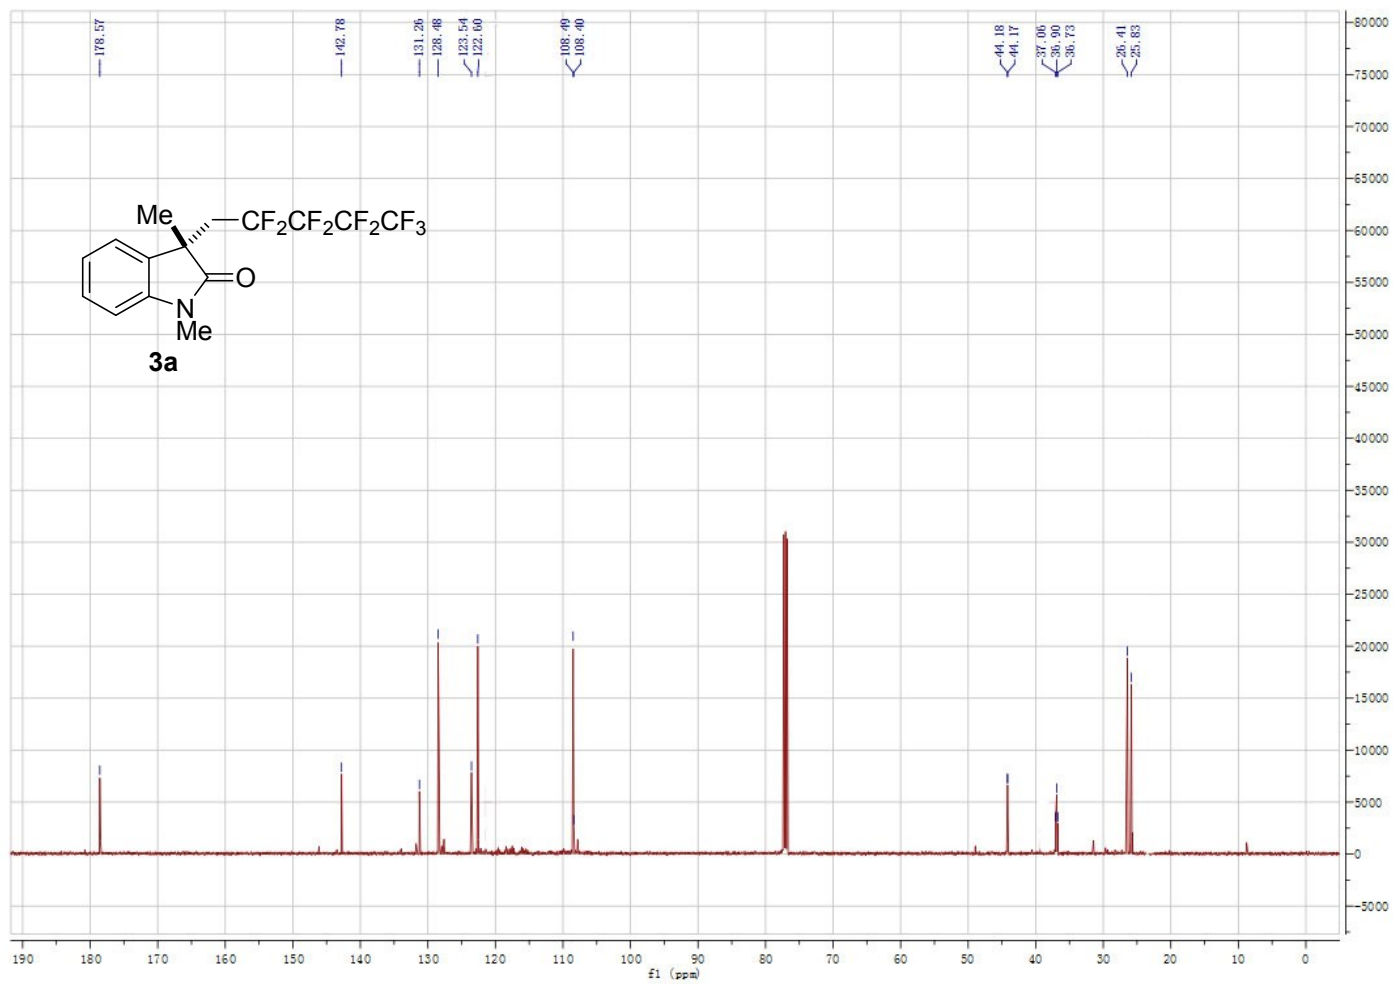

**3-dimethyl-3-(2,2,3,3,4,4,5,5,5-nonafluoropentyl)indolin-2-one (3a)**

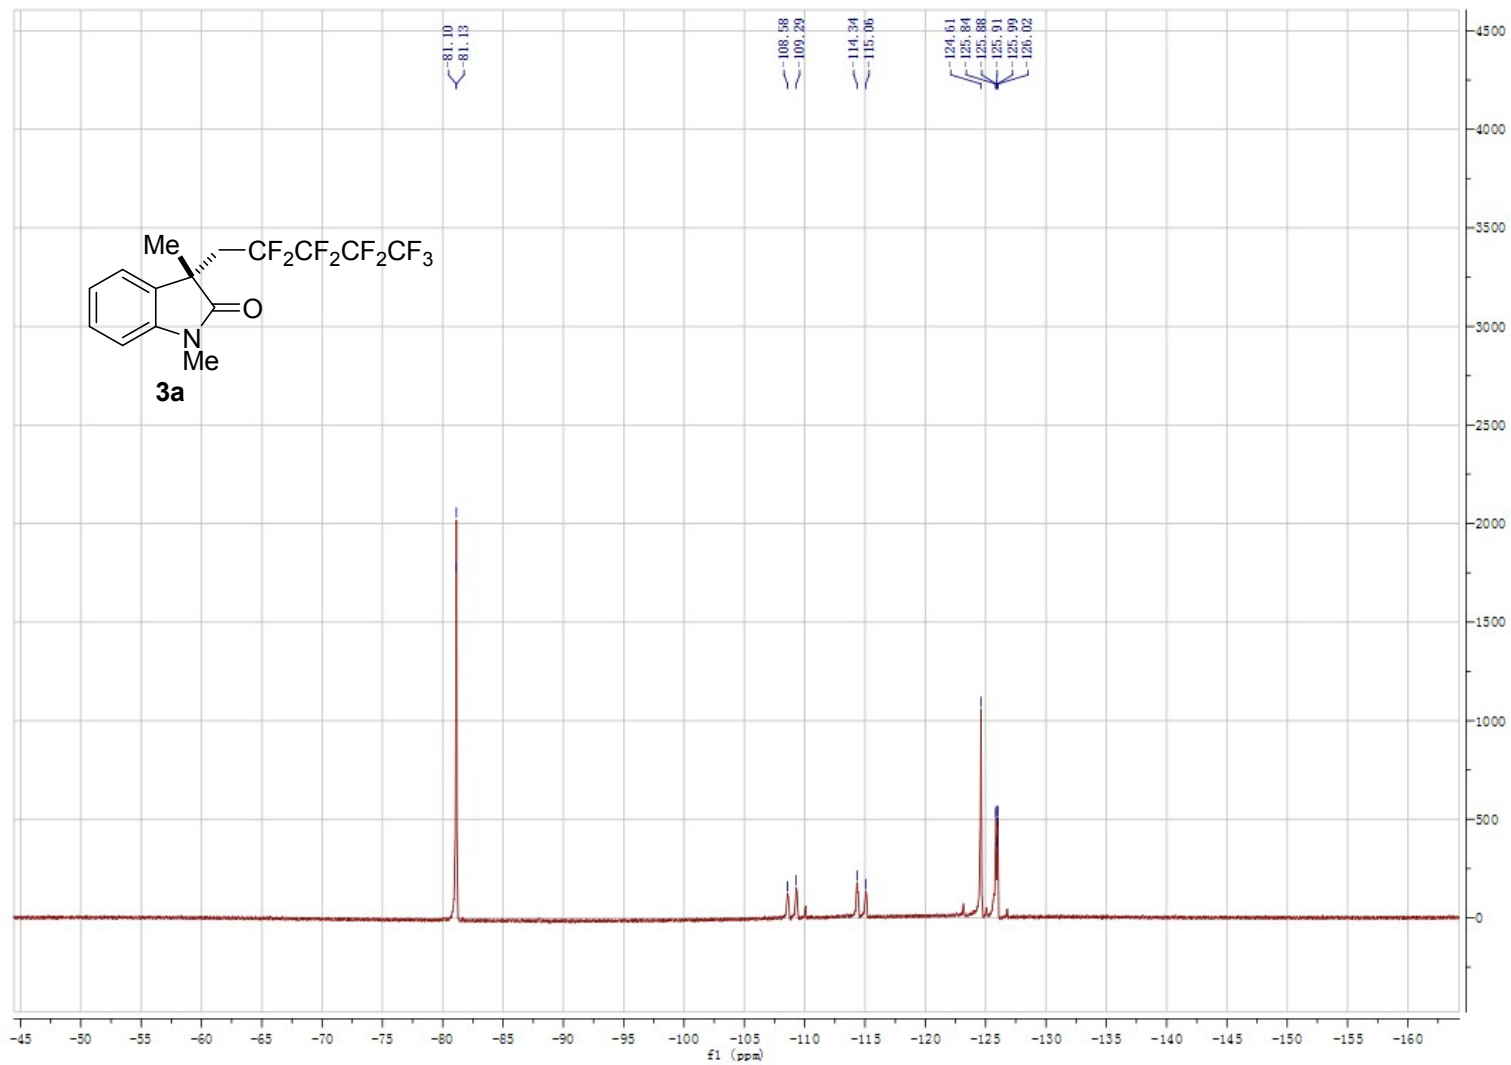

**1-ethyl-3-methyl-3-(2,2,3,3,4,4,5,5,5-nonafluoropentyl)indolin-2-one (3b)**

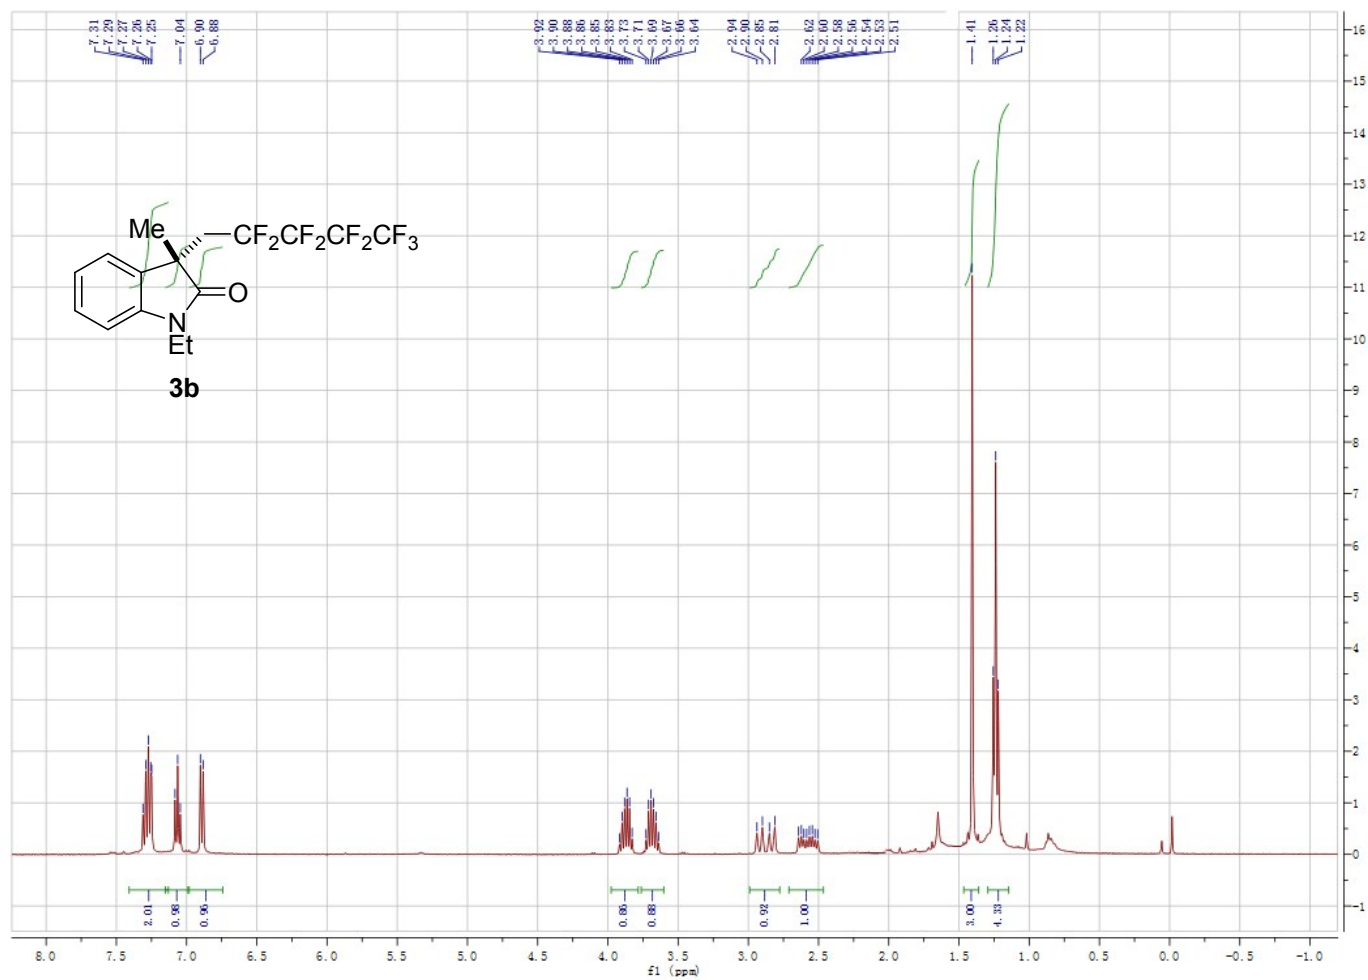

### 1-ethyl-3-methyl-3-(2,2,3,3,4,4,5,5,5-nonafluoropentyl)indolin-2-one (3b)

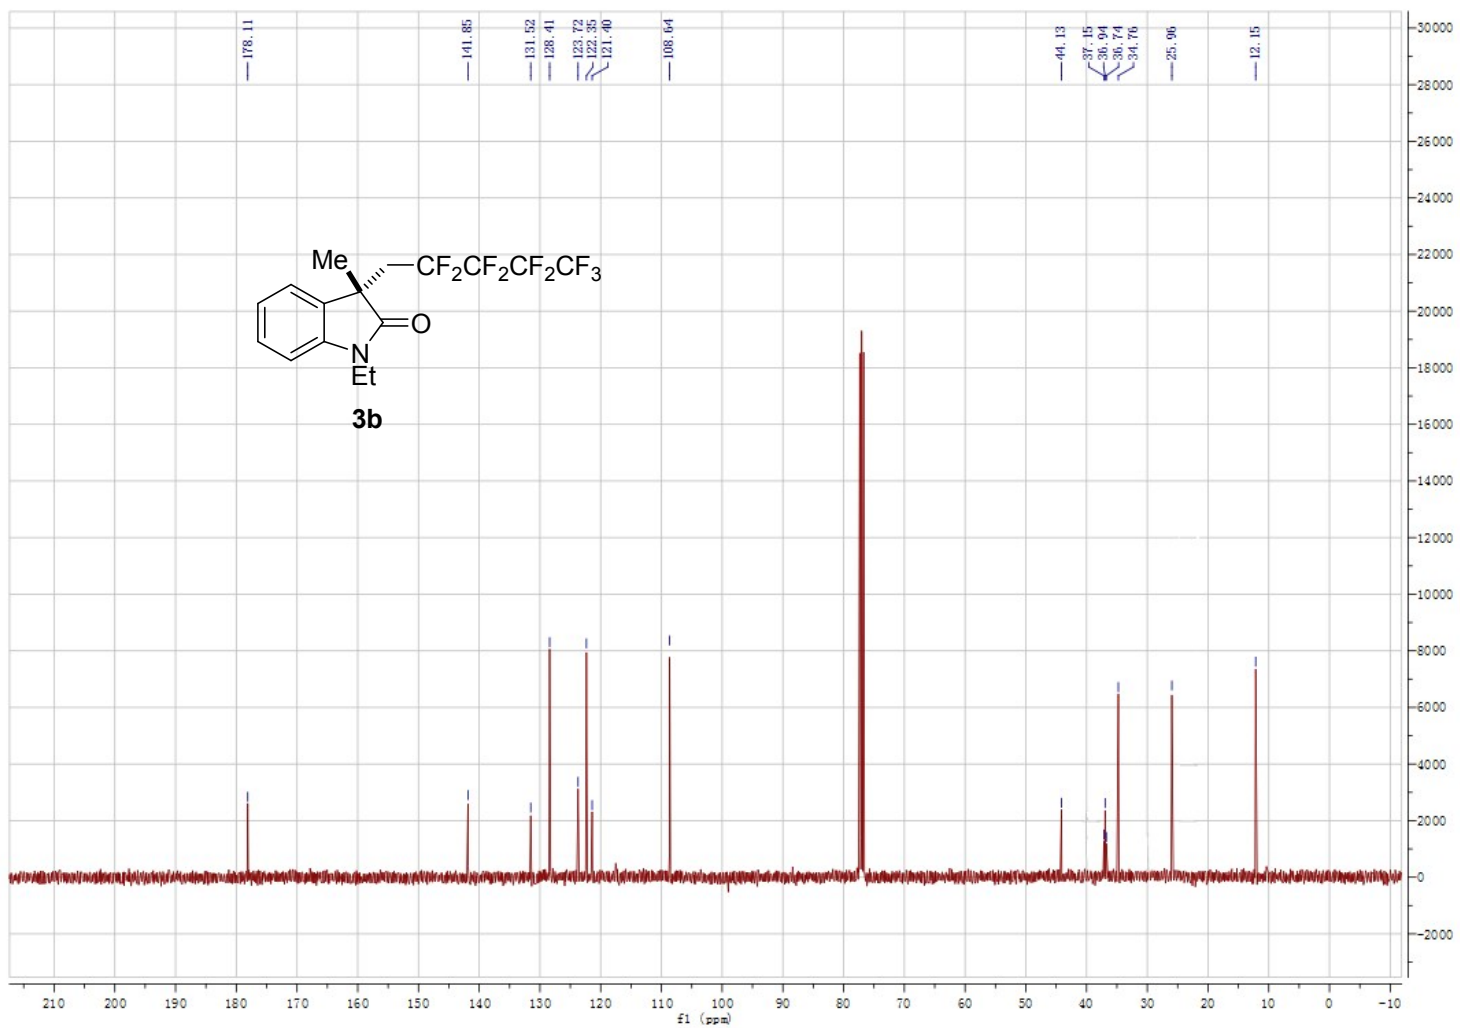

1-ethyl-3-methyl-3-(2,2,3,3,4,4,5,5,5-nonafluoropentyl)indolin-2-one (3b)

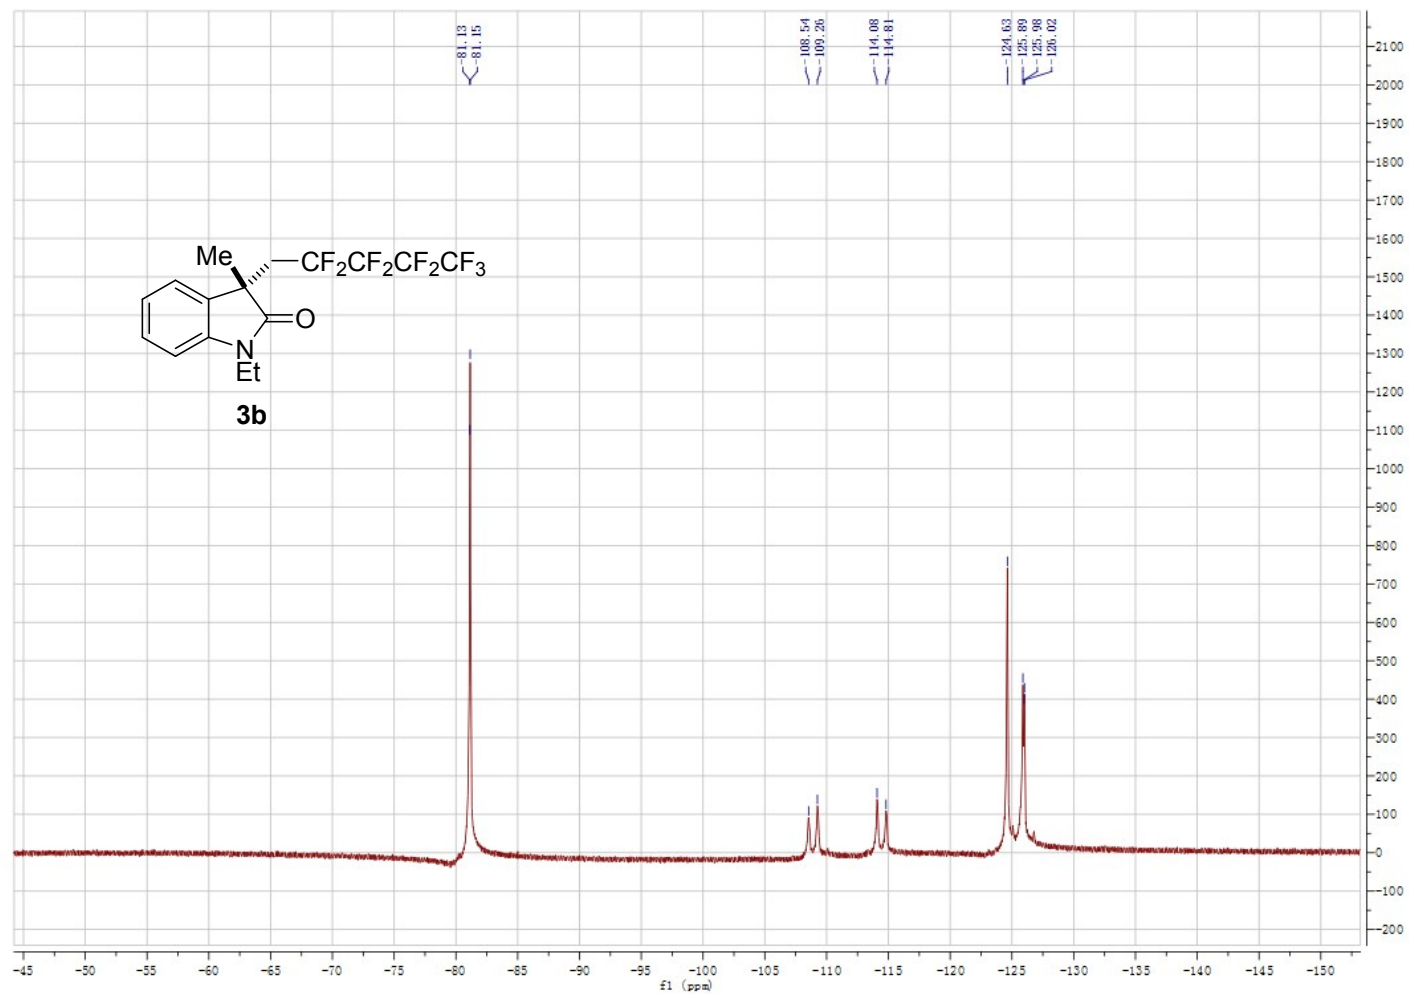



3-(1-Benzyl-3-methyl-2-oxindolin-3-yl)-2,2-dimethylpropanenitrile (3c)

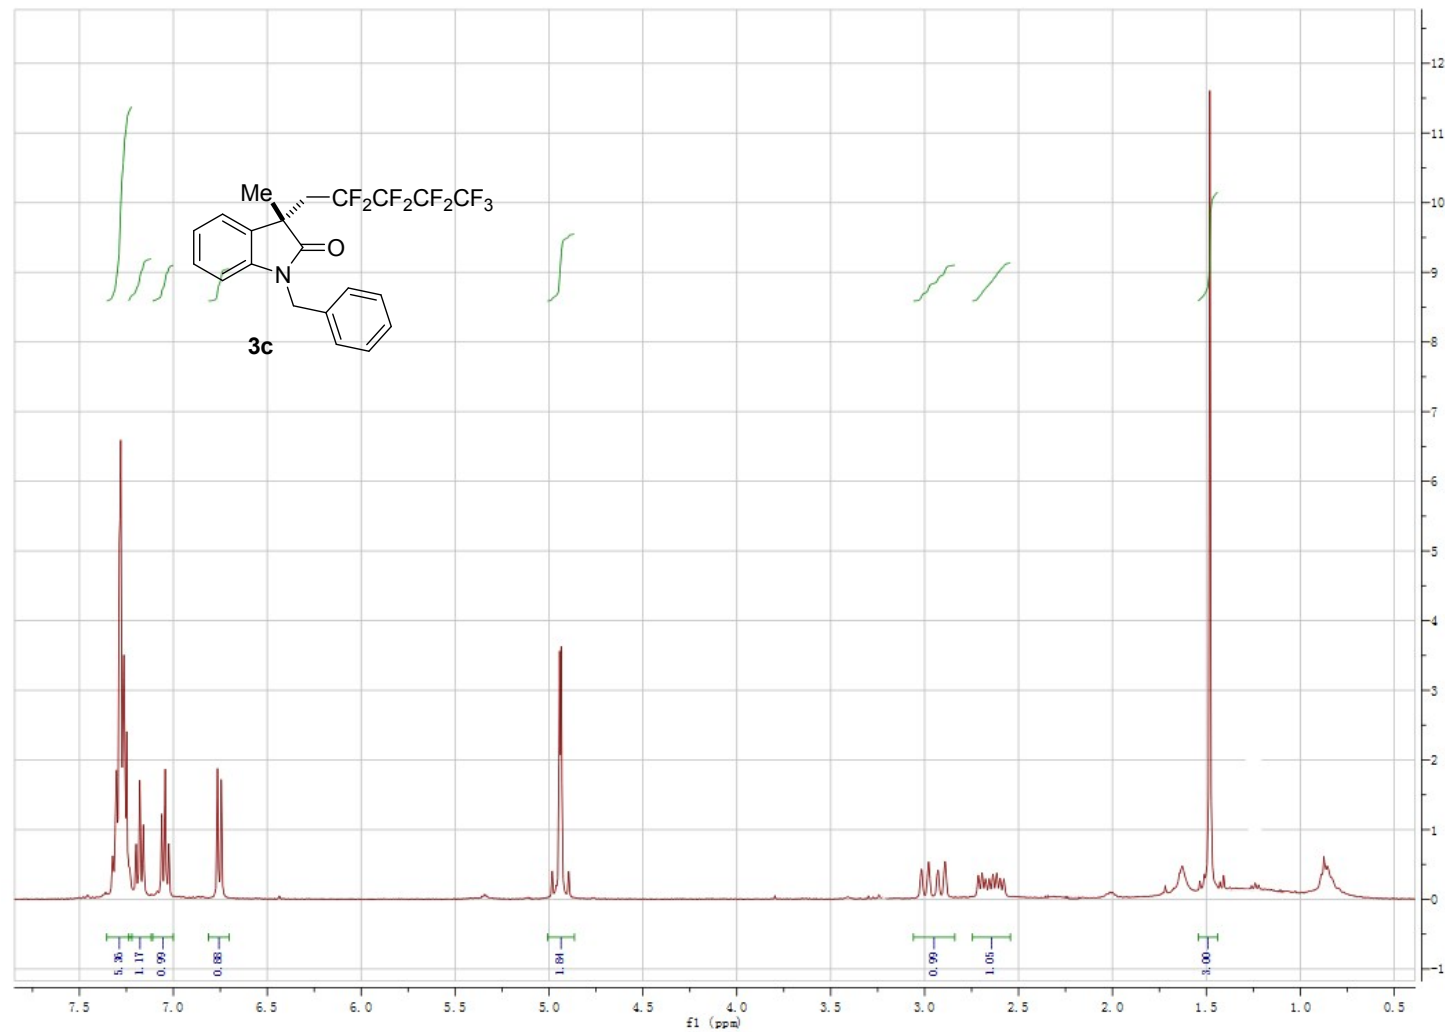

### 3-(1-Benzyl-3-methyl-2-oxindolin-3-yl)-2,2-dimethylpropanenitrile(3c)

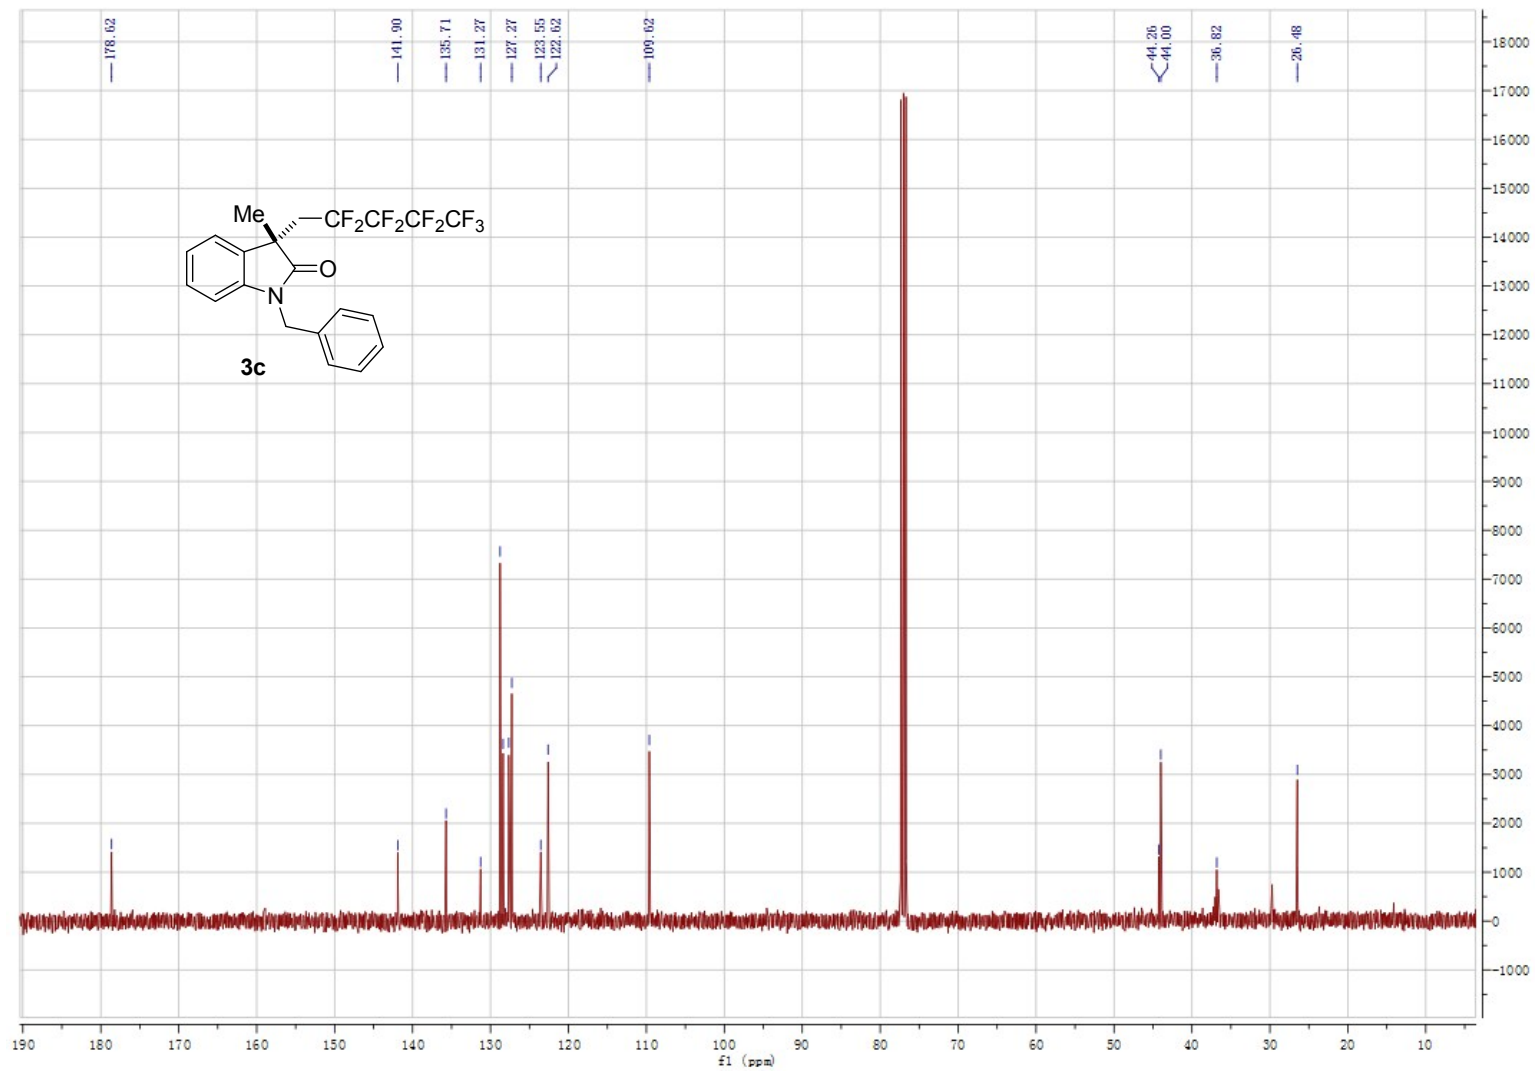

### 3-(1-Benzyl-3-methyl-2-oxindolin-3-yl)-2,2-dimethylpropanenitrile(3c)

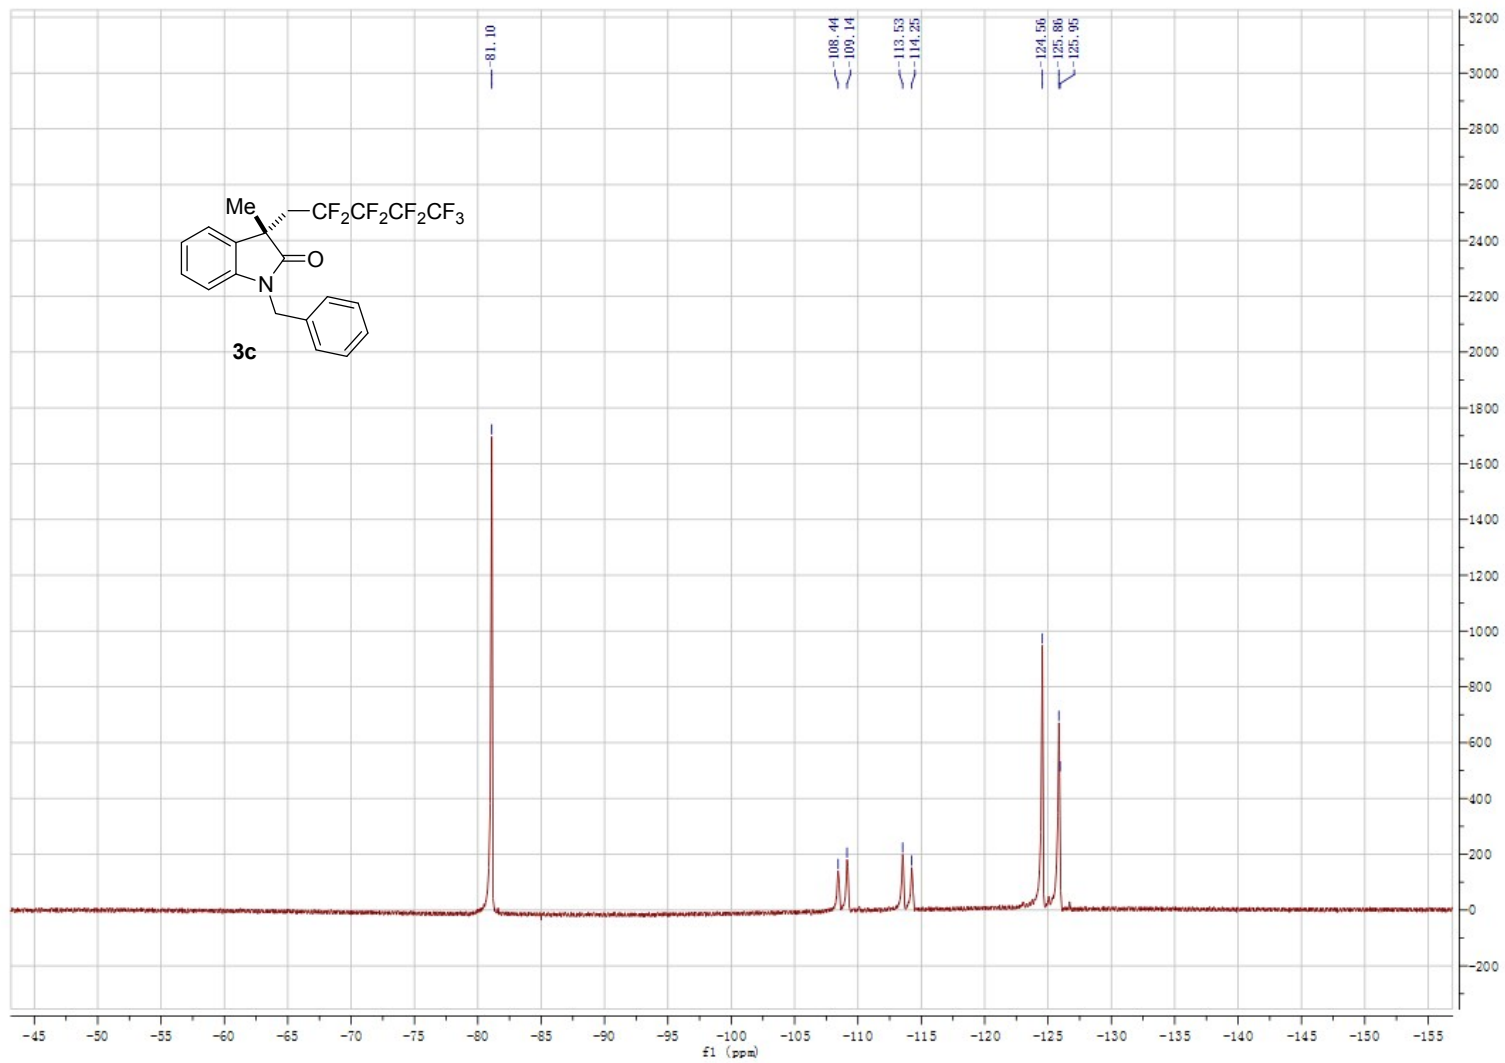

# 1,3,5-trimethyl-3-(2,2,3,3,4,4,5,5,5-nonafluoropentyl)indolin-2-one (3e)

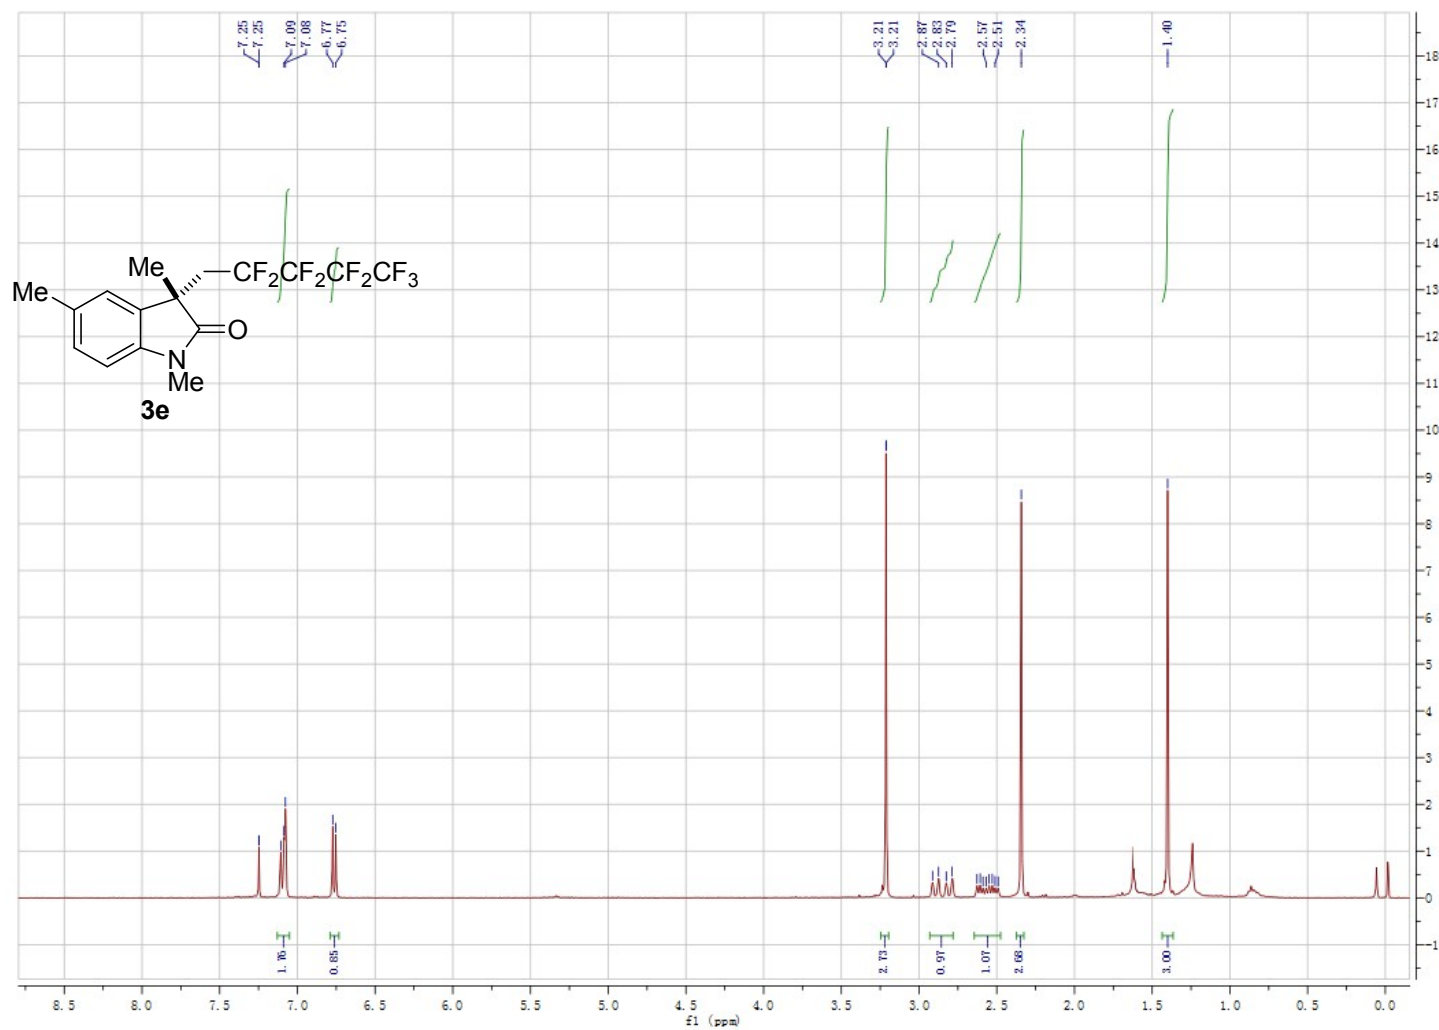

1,3,5-

trimethyl-3-(2,2,3,3,4,4,5,5,5-nonafluoropentyl)indolin-2-one (3e)

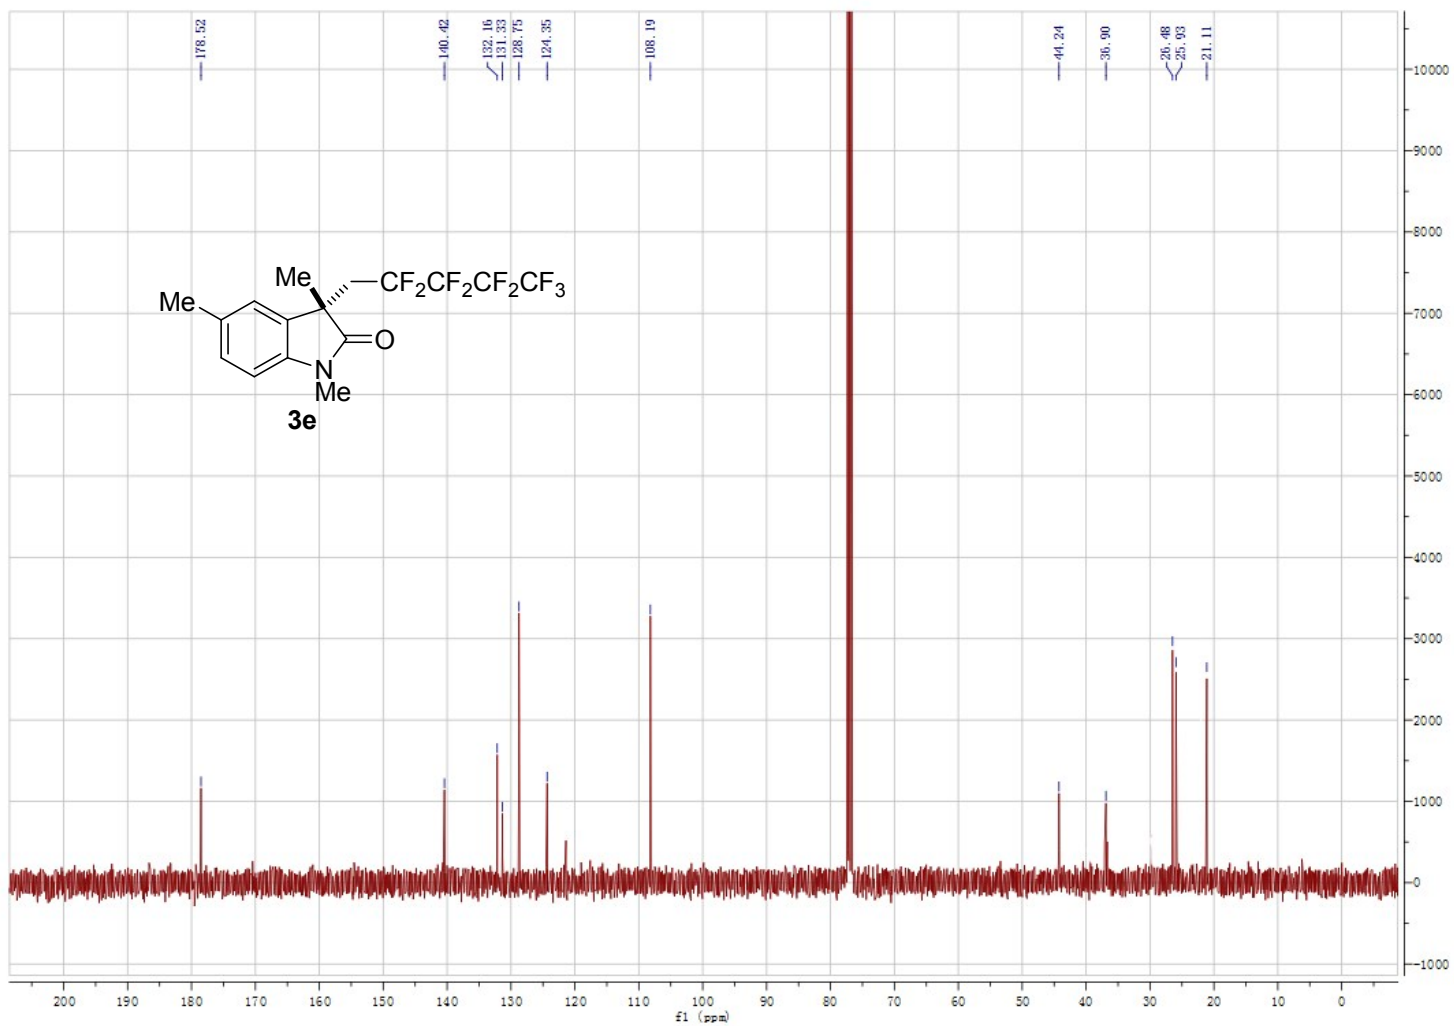

1,3,5-trimethyl-3-(2,2,3,3,4,4,5,5,5-nonafluoropentyl)indolin-2-one (3e)

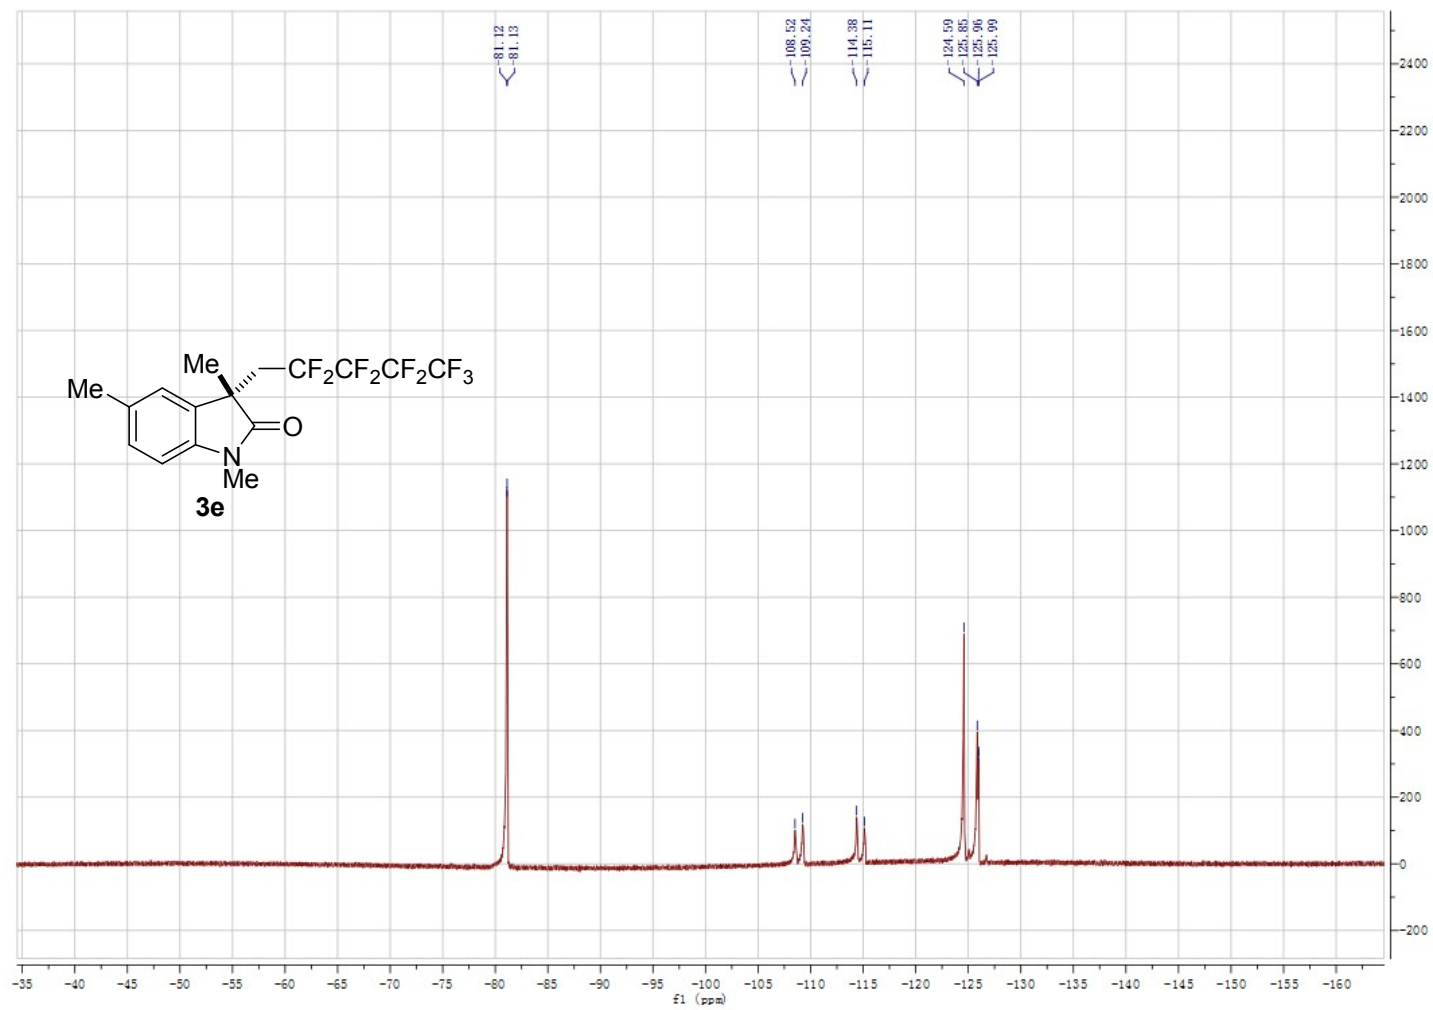

5-methoxy-1,3-dimethyl-3-(2,2,3,3,4,4,5,5,5-nonafluoropentyl)indolin-2-one (3f).

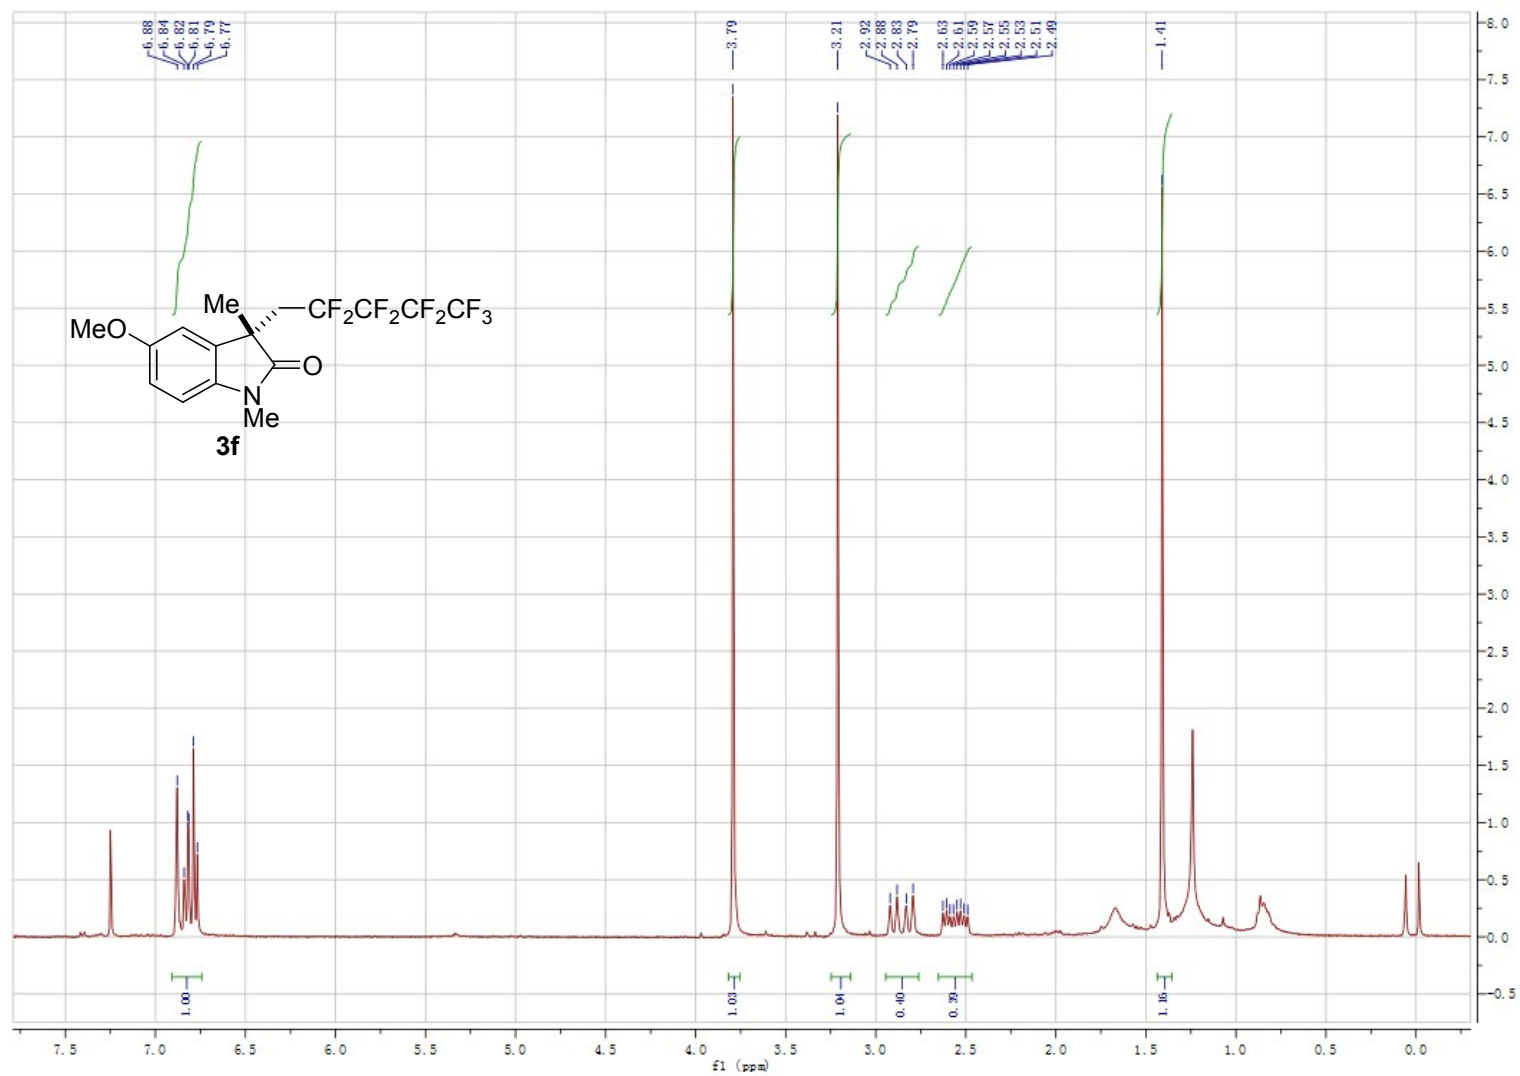

methoxy-1,3-dimethyl-3-(2,2,3,3,4,4,5,5,5-nonafluoropentyl)indolin-2-one (3f).

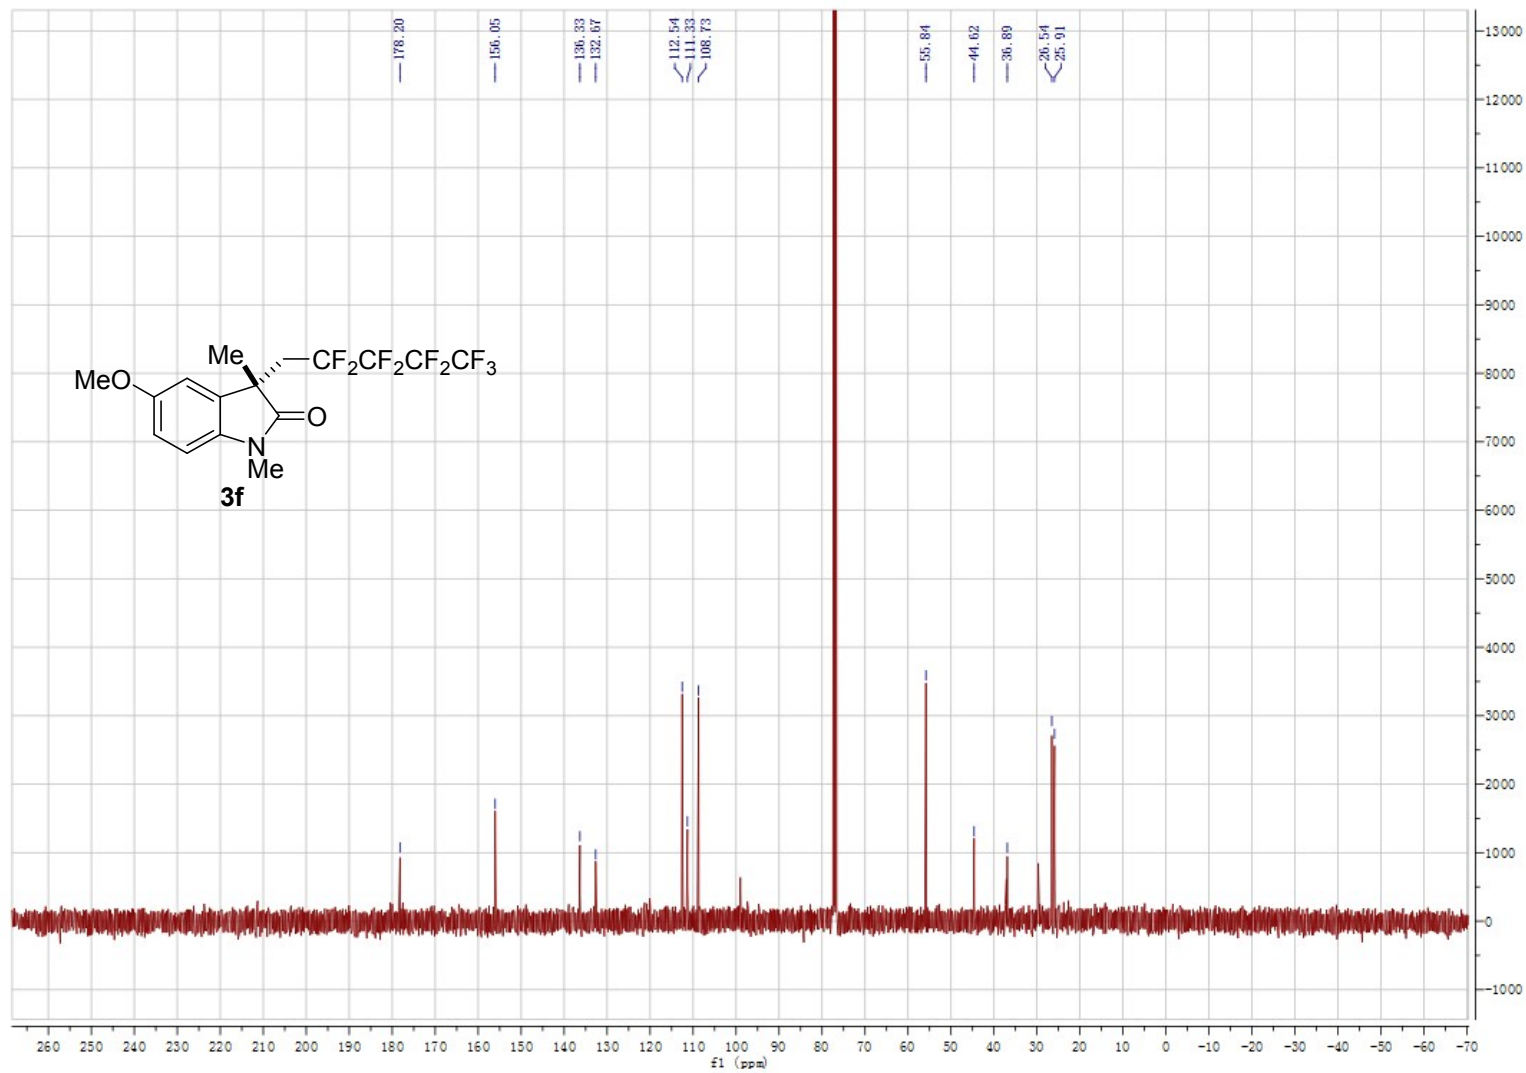



**5-methoxy-1,3-dimethyl-3-(2,2,3,3,4,4,5,5,5-nonafluoropentyl)indolin-2-one (3f).**

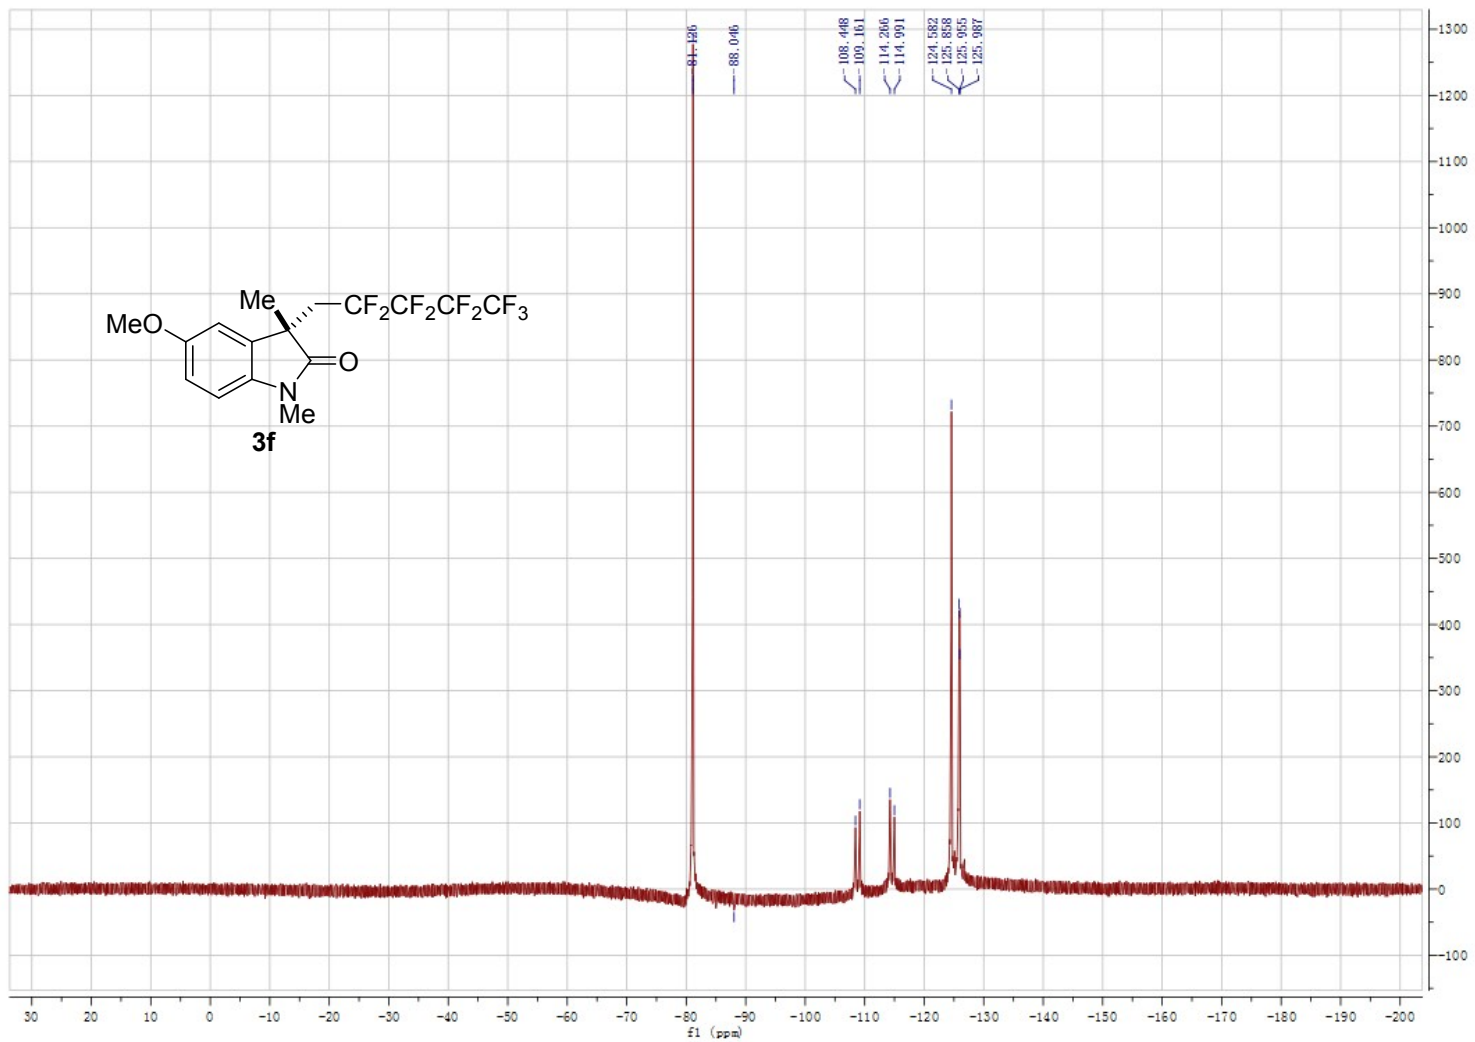

5-fluoro-1,3-dimethyl-3-(2,2,3,3,4,4,5,5,5-nonafluoropentyl)indolin-2-one (3g)

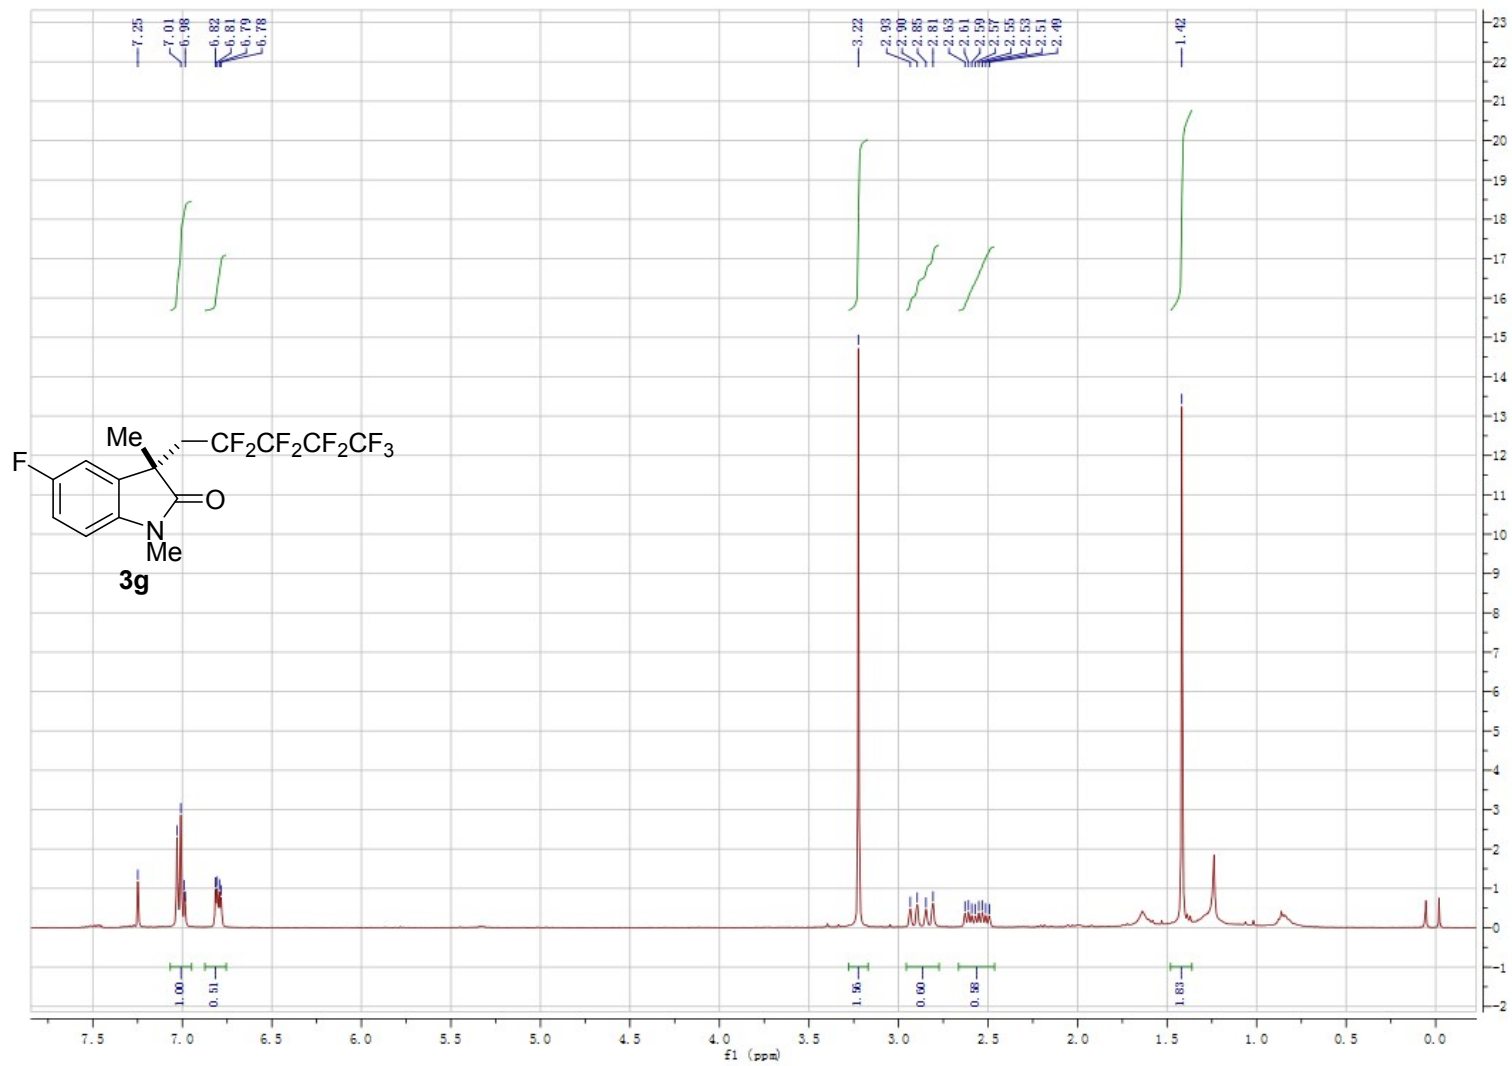

5-fluoro-1,3-dimethyl-3-(2,2,3,3,4,4,5,5,5-nonafluoropentyl)indolin-2-one (3g)

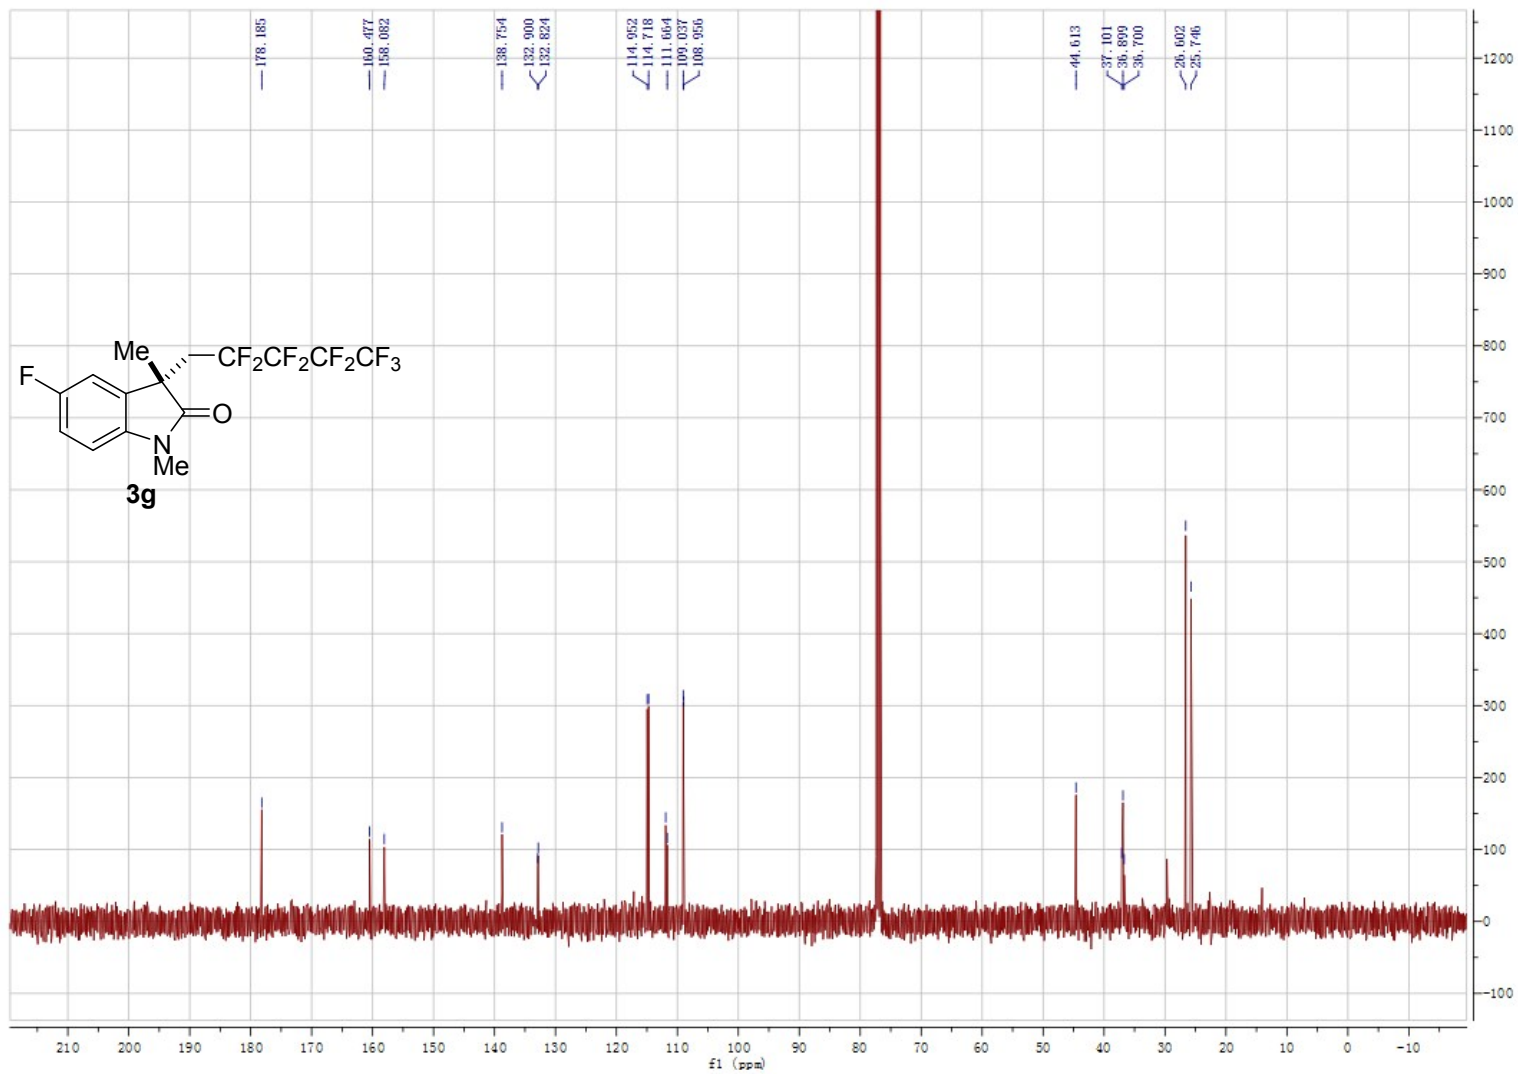

5-fluoro-1,3-dimethyl-3-(2,2,3,3,4,4,5,5,5-nonafluoropentyl)indolin-2-one (3g)

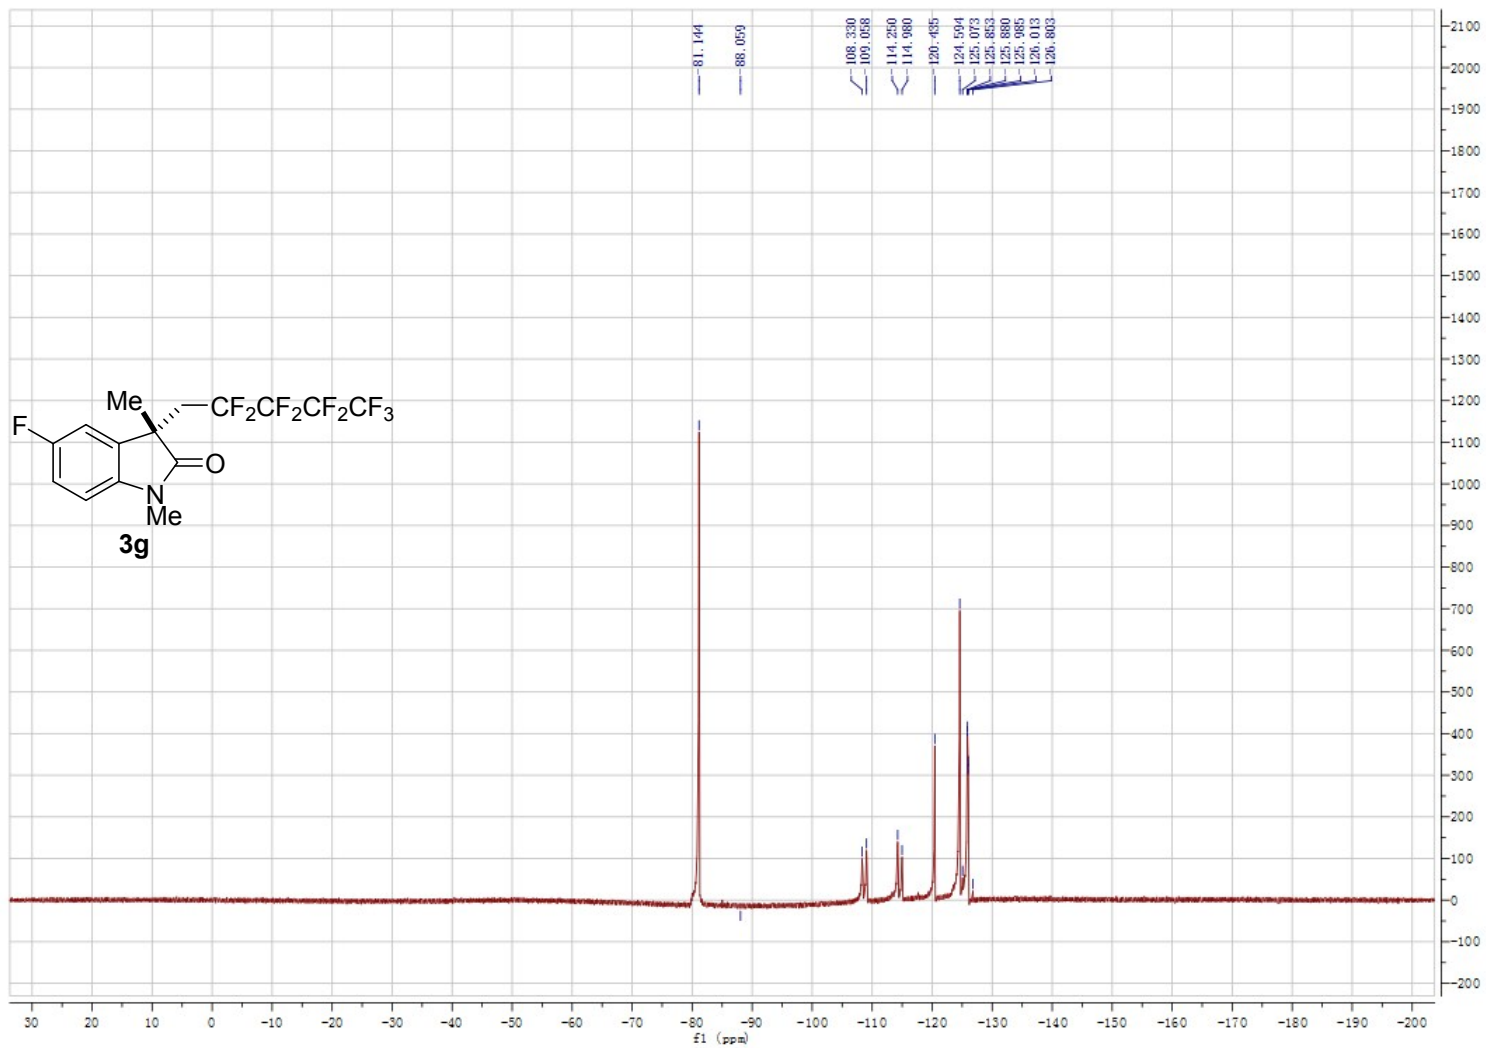

chloro-1,3-dimethyl-3-(2,2,3,3,4,4,5,5,5-nonafluoropentyl)indolin-2-one (3h)

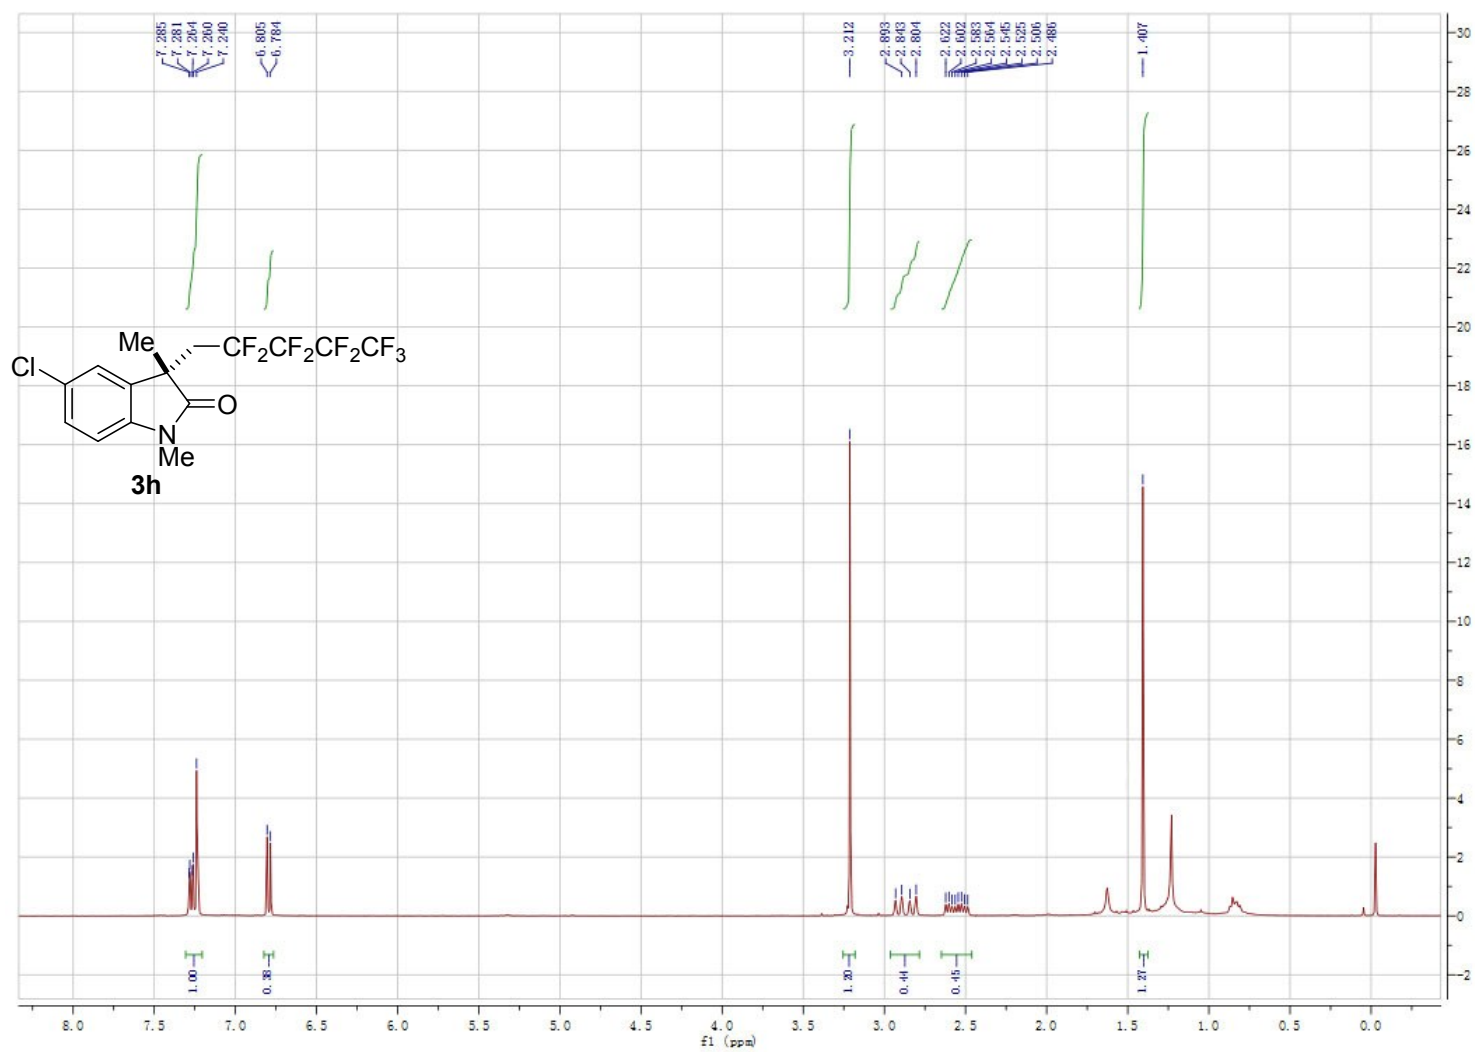

chloro-

1,3-

dimethyl-3-(2,2,3,3,4,4,5,5,5-nonafluoropentyl)indolin-2-one (3h)

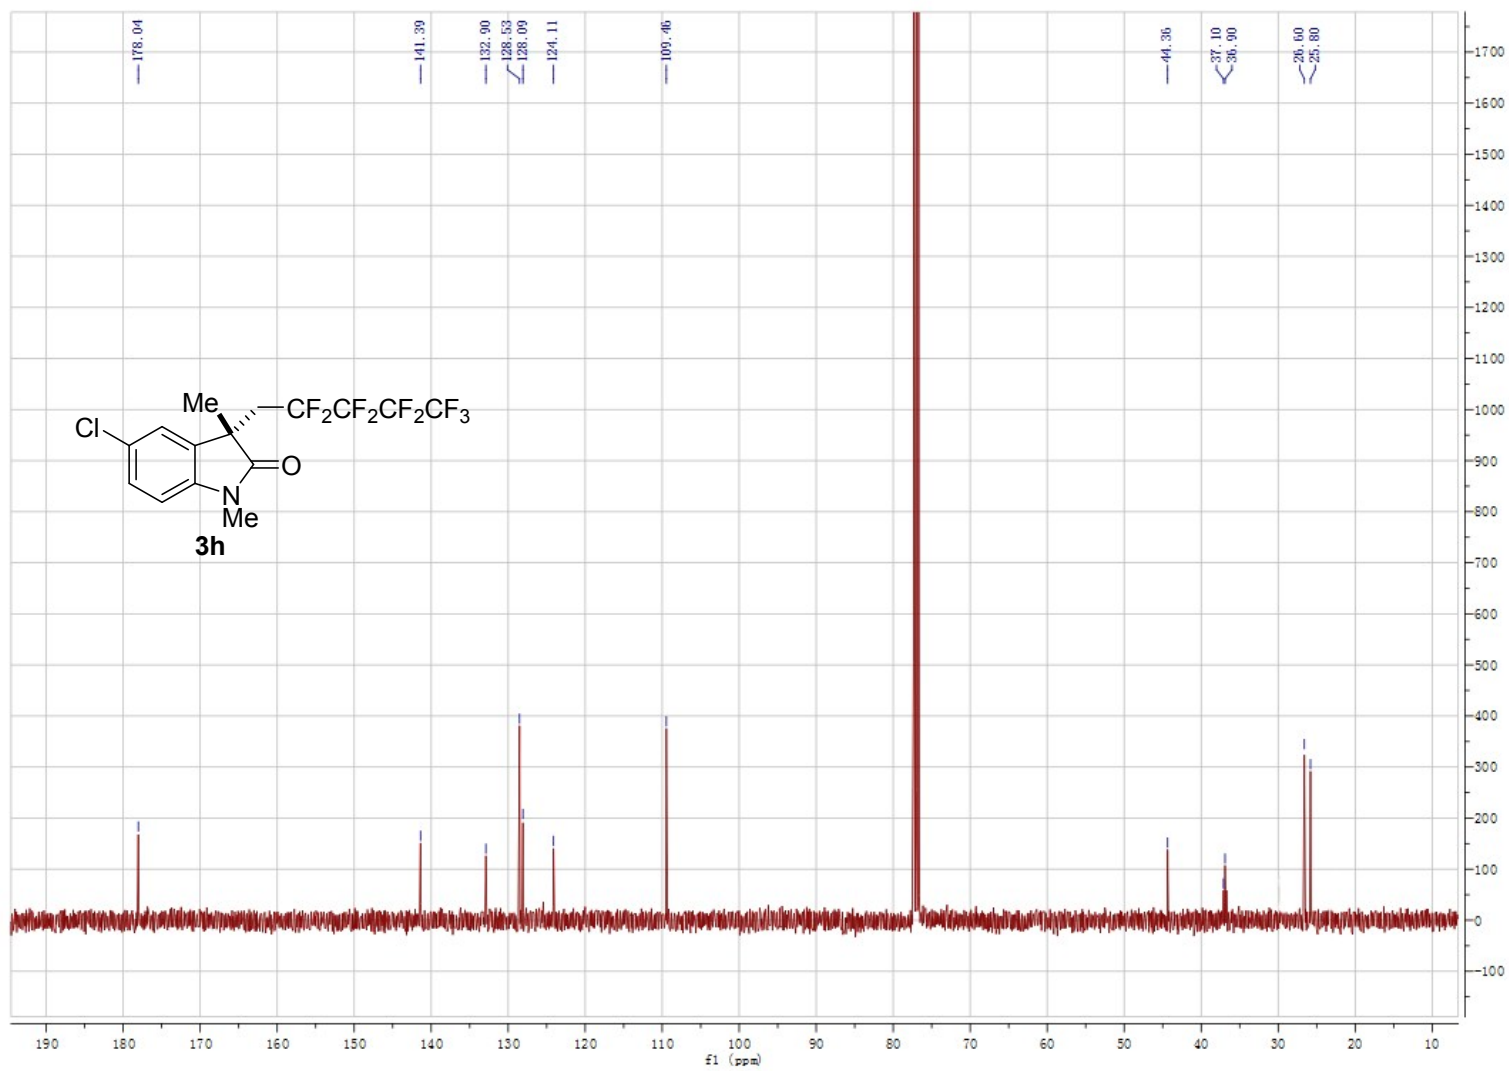

chloro-1,3-dimethyl-3-(2,2,3,3,4,4,5,5,5-nonafluoropentyl)indolin-2-one (3h)

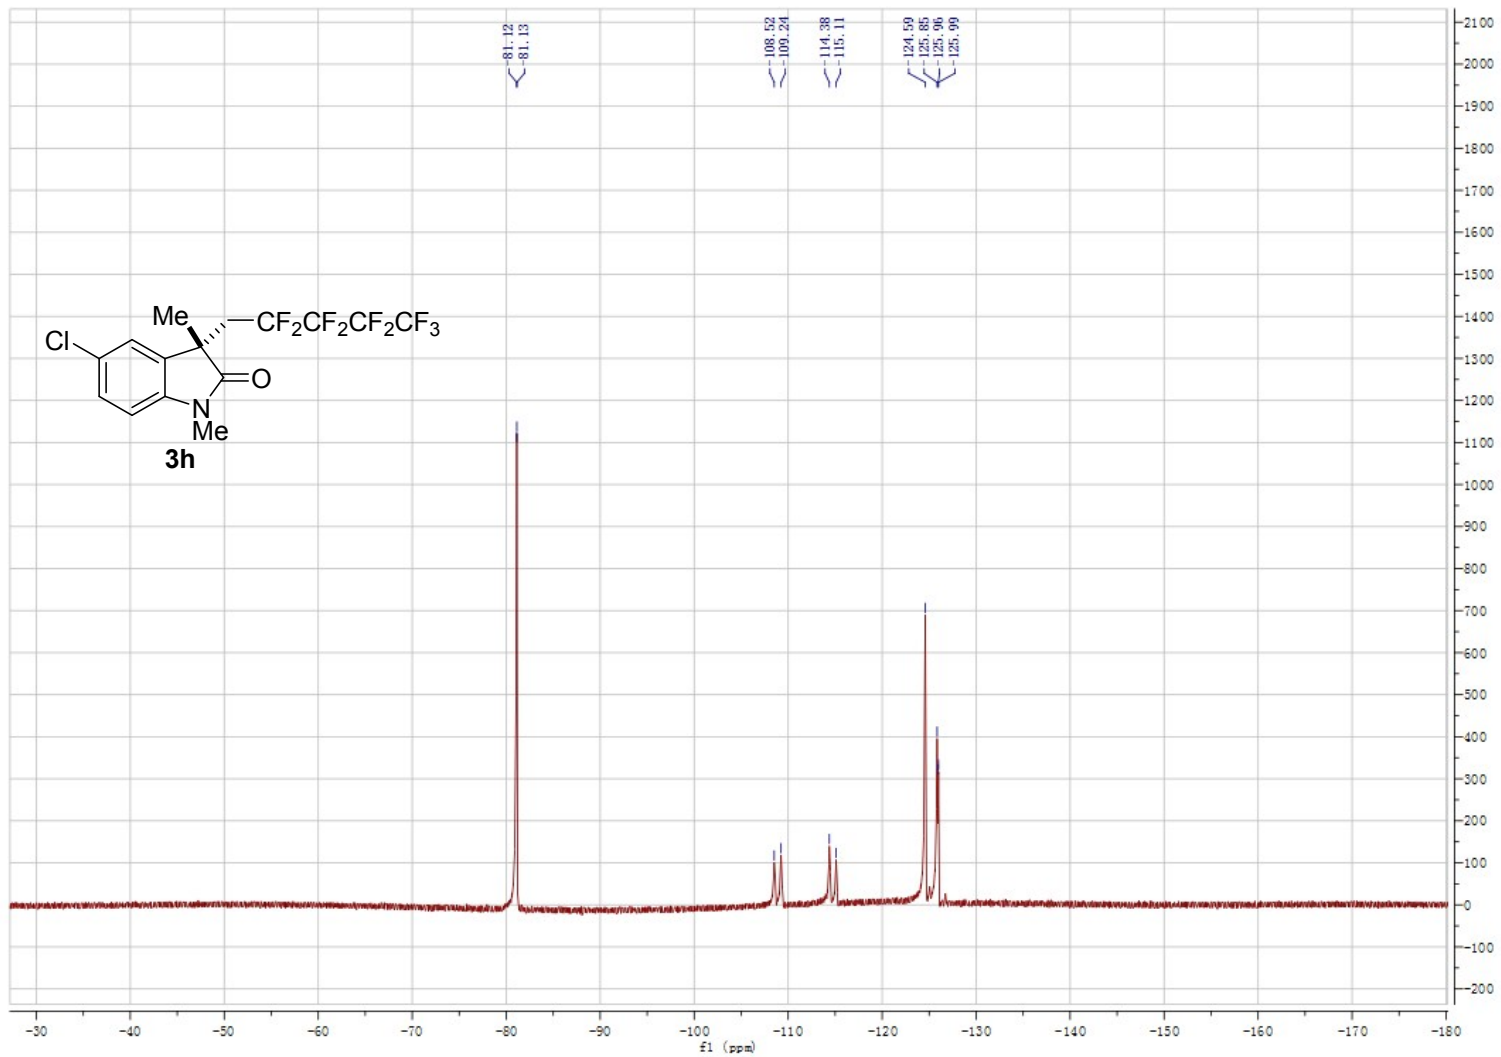

1,3-dimethyl-3-(2,2,3,3,4,4,5,5,5-nonafluoropentyl)-5-(trifluoromethyl)indolin-2-one (3i)

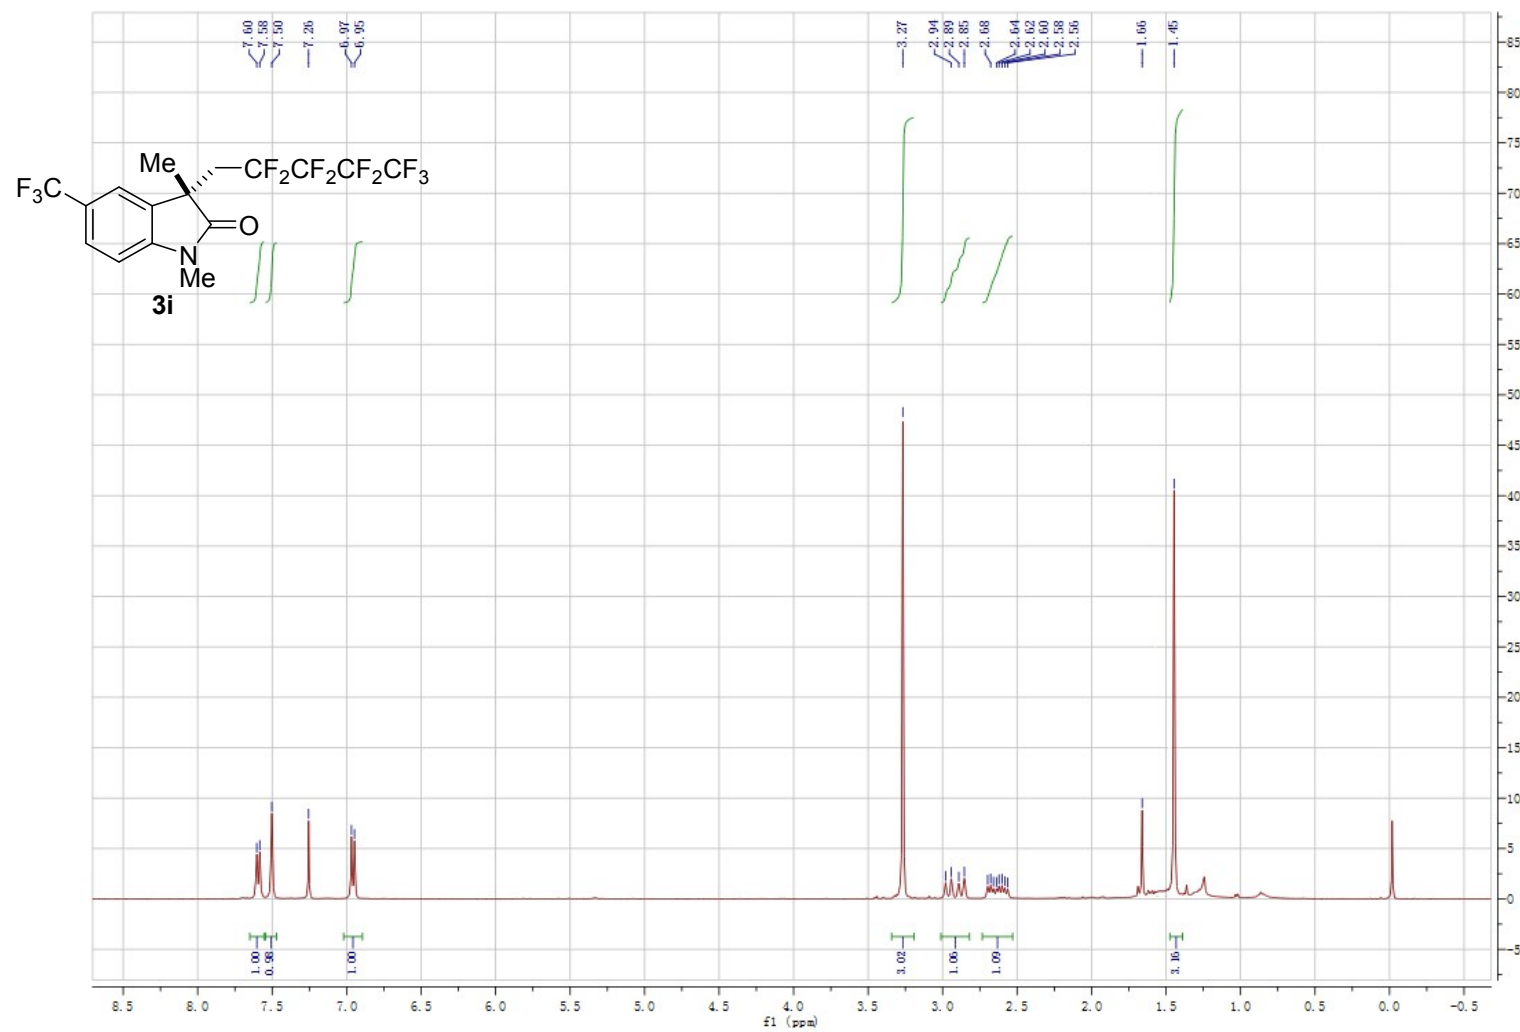

1,3-





1,3-dimethyl-3-(2,2,3,3,4,4,5,5,5-nonafluoropentyl)-5-(trifluoromethyl)indolin-2-one (3i)

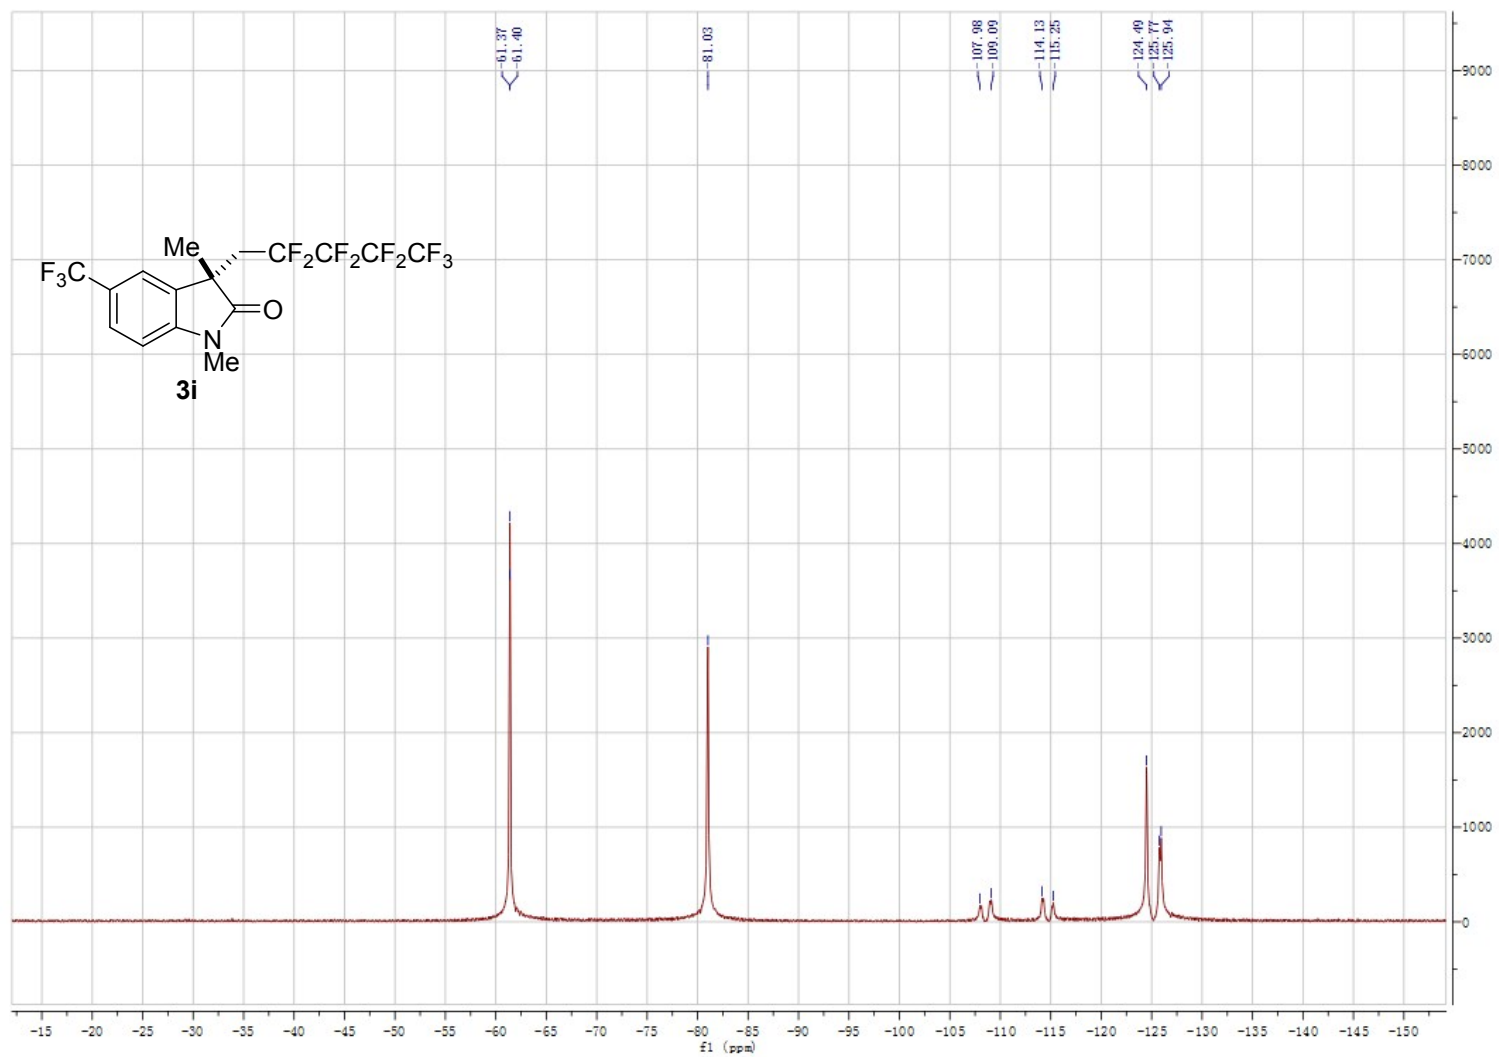

# Ethyl 1,3-dimethyl-3-(2,2,3,3,4,4,5,5,5-nonafluoropentyl)-2-oxindoline-5-carboxylate (3j)

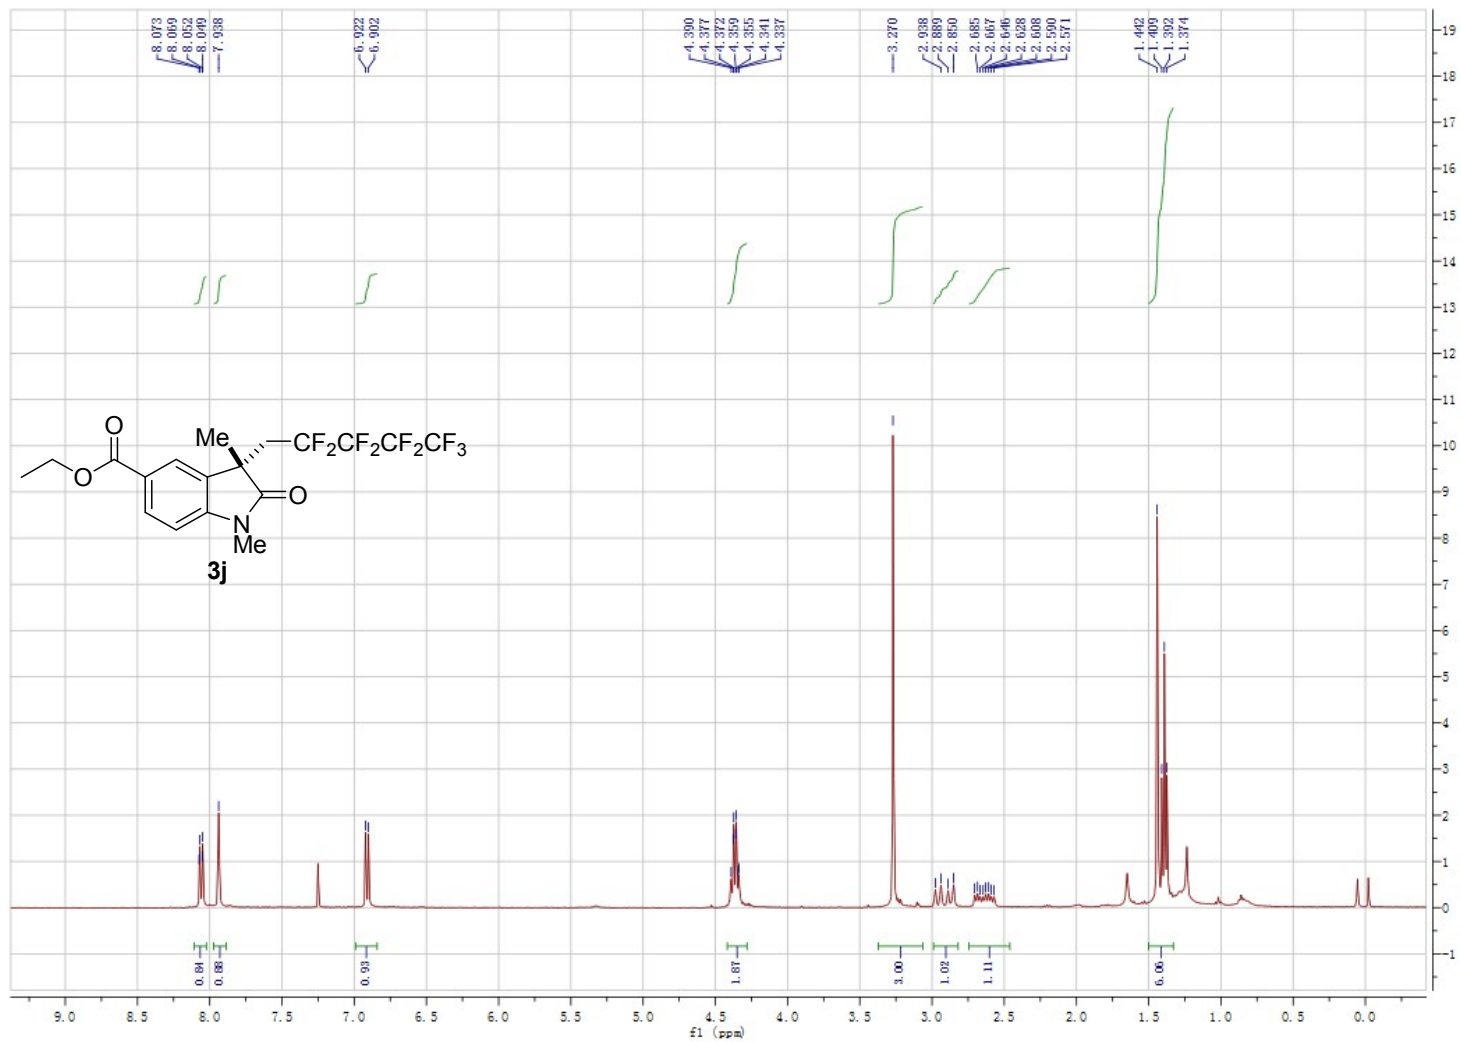

Ethyl 1,3-dimethyl-3-(2,2,3,3,4,4,5,5,5-nonafluoropentyl)-2-oxindoline-5-carboxylate (**3j**)

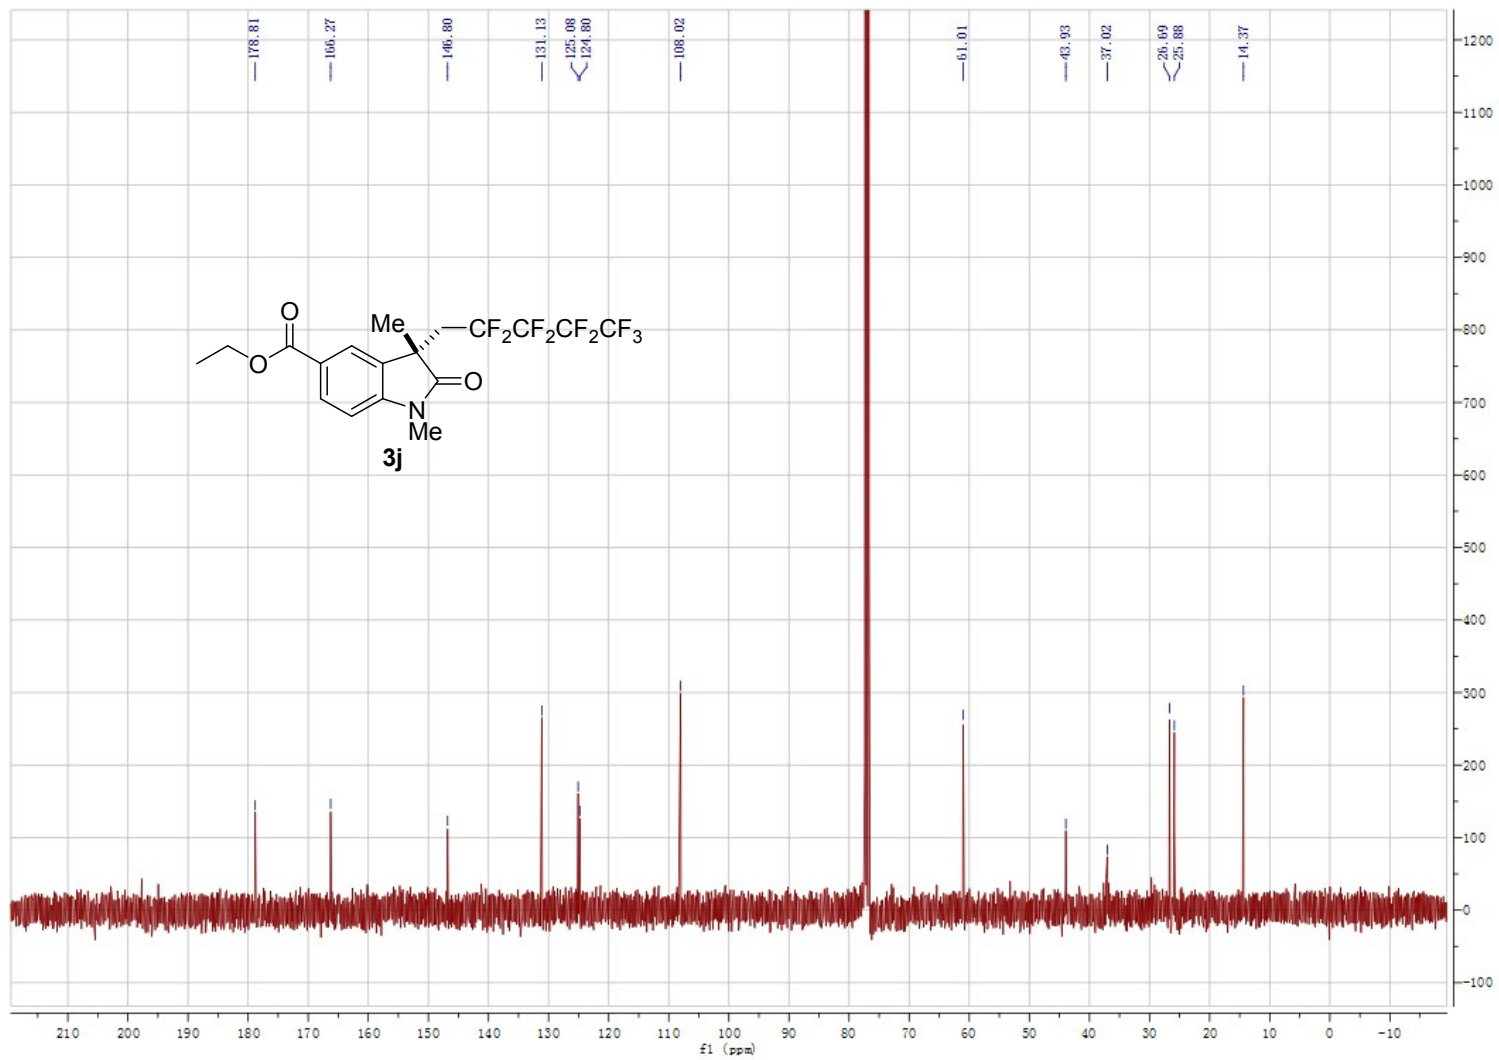

Ethyl 1,3-dimethyl-3-(2,2,3,3,4,4,5,5,5-nonafluoropentyl)-2-oxindoline-5-carboxylate (3j)

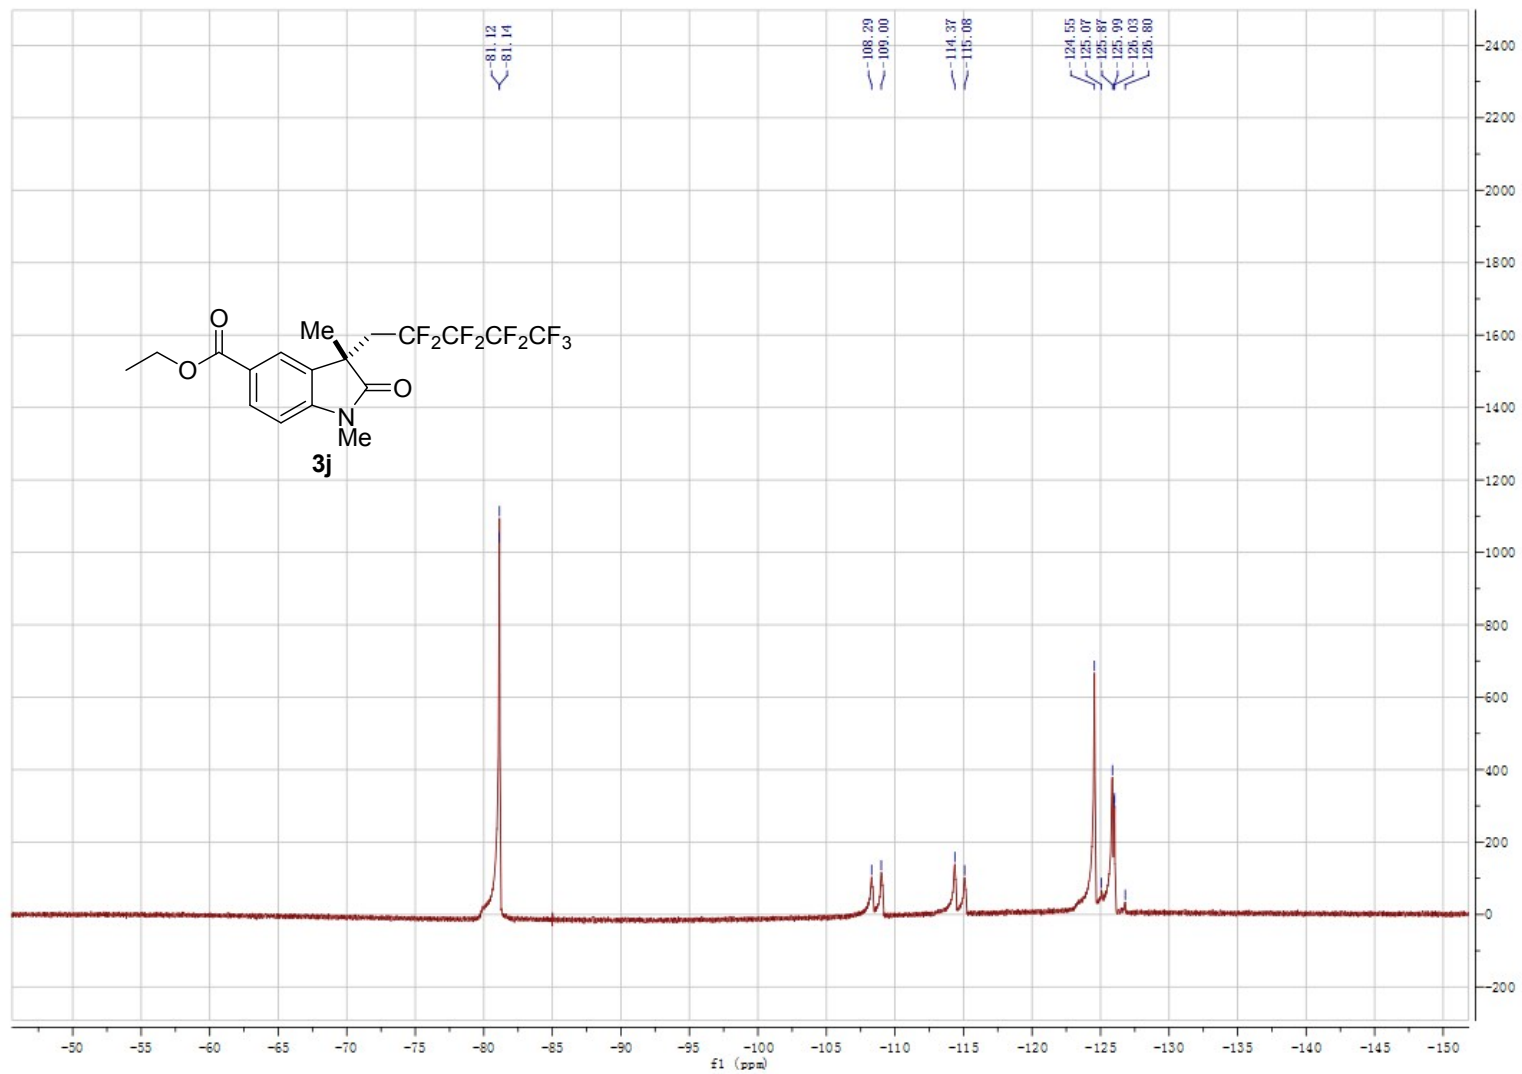

Ethyl 1,3,7-trimethyl-3-(2,2,3,3,4,4,5,5,5-nonafluoropentyl)indolin-2-one (3k).

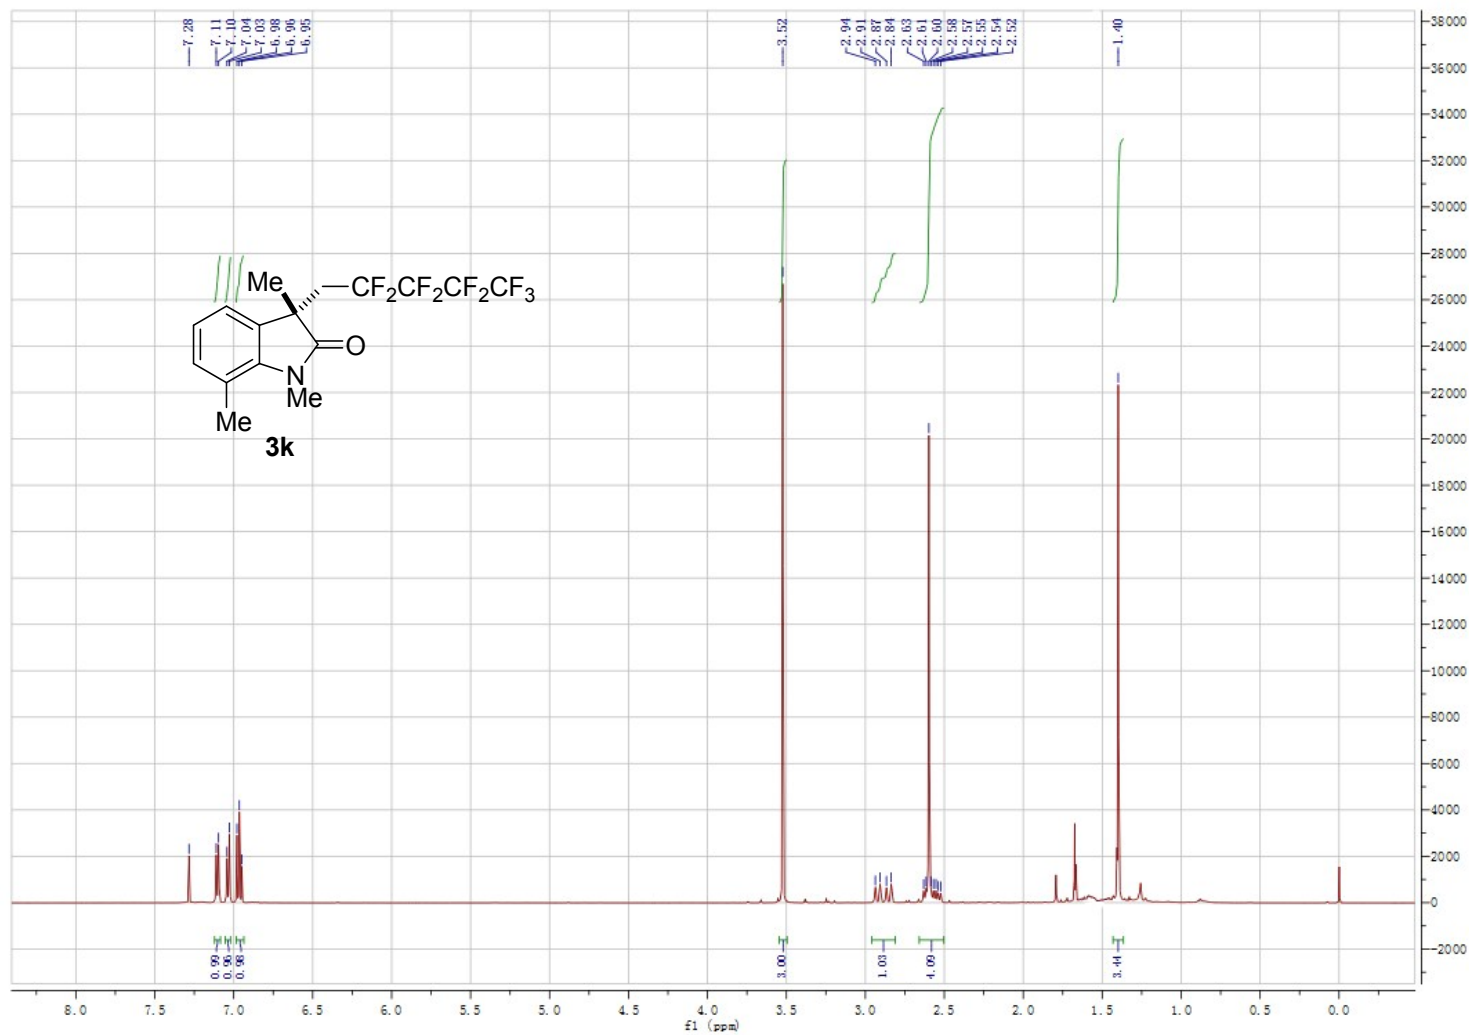

Ethyl

1,3,7-trimethyl-3-(2,2,3,3,4,4,5,5,5-nonafluoropentyl)indolin-2-one (3k).

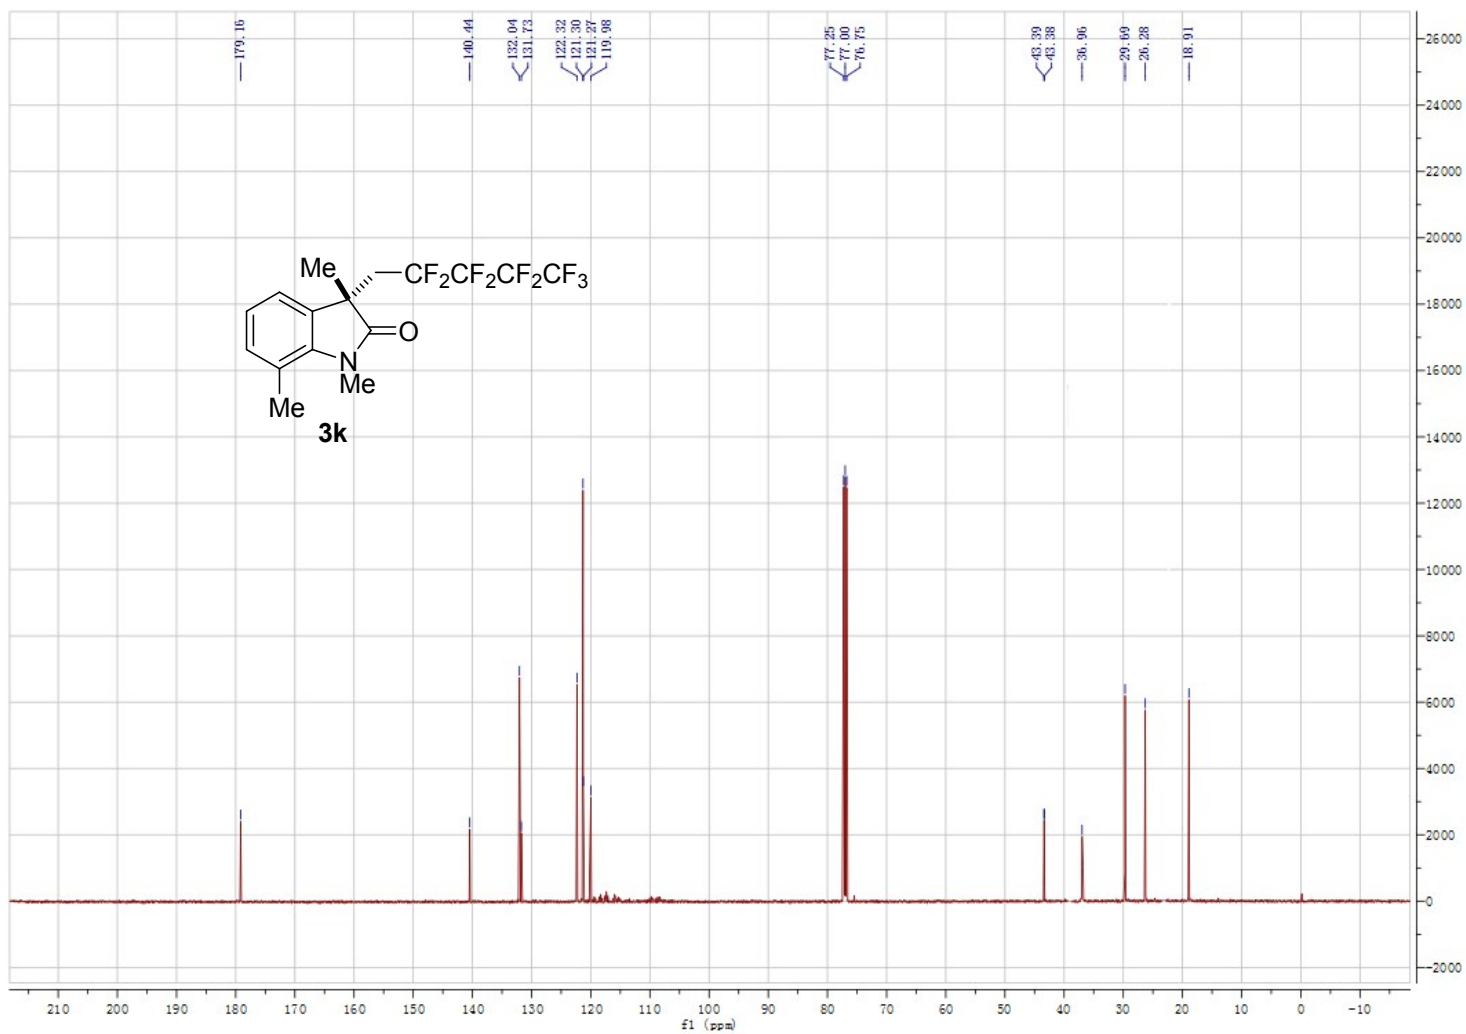

Ethyl 1,3,7-trimethyl-3-(2,2,3,3,4,4,5,5,5-nonafluoropentyl)indolin-2-one (3k).

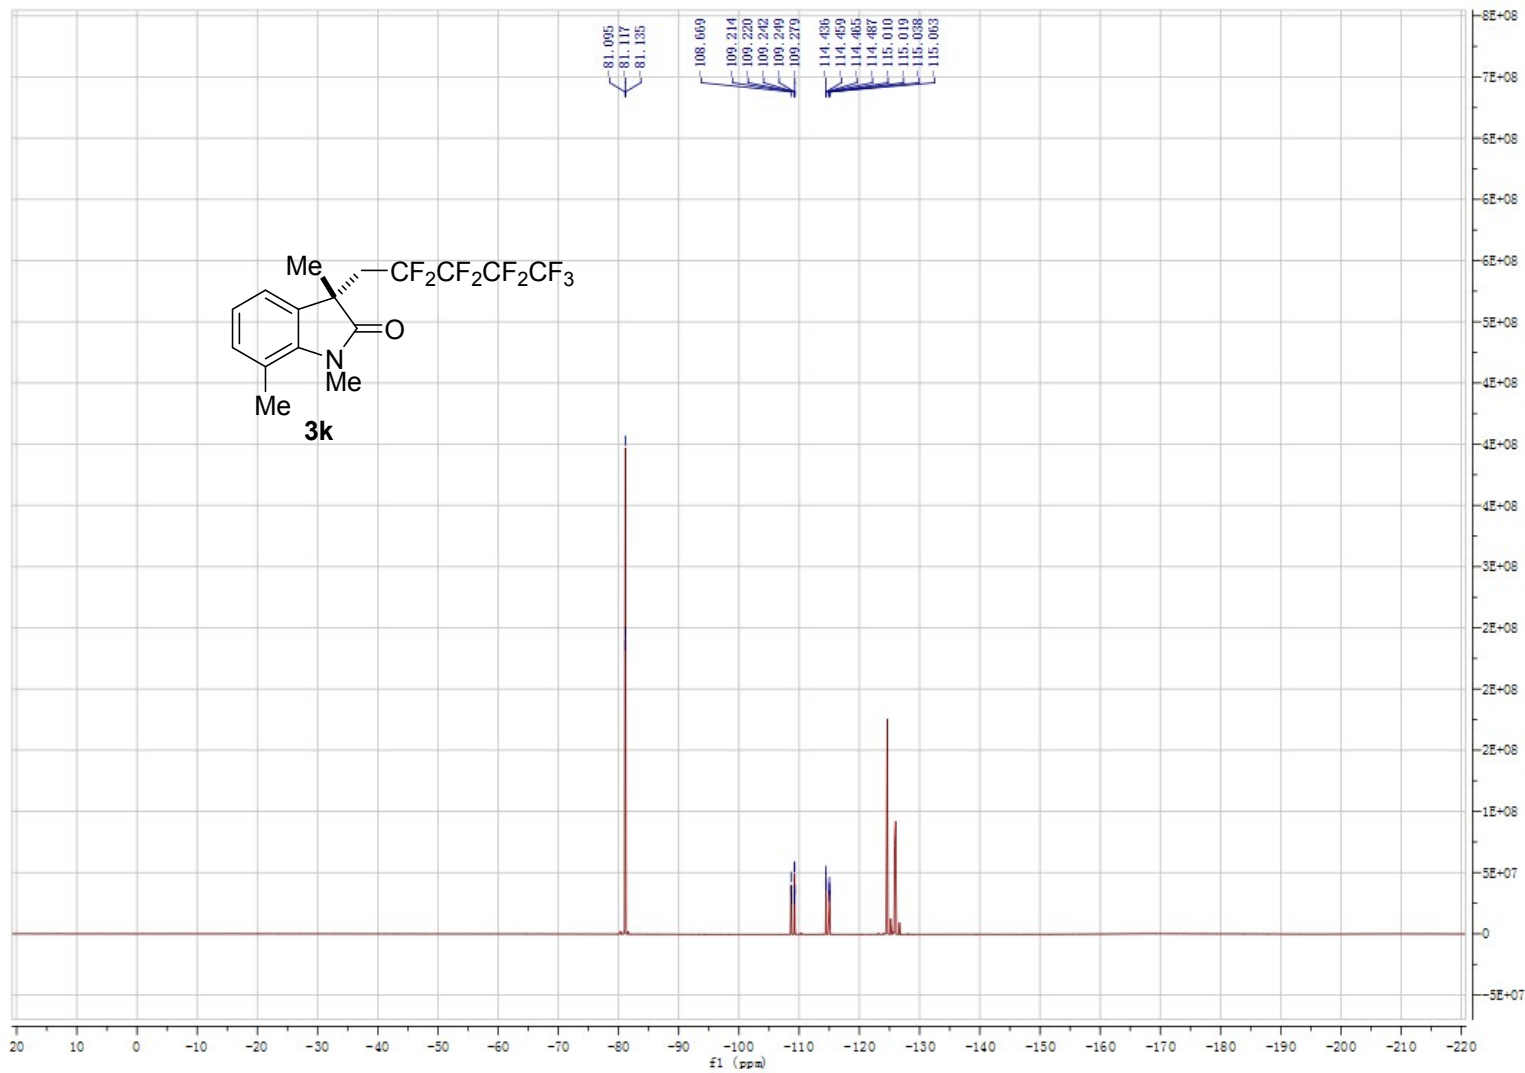



mixture of 1,3,4-trimethyl-3-(2,2,3,3,4,4,5,5,5-nonafluoropentyl)indolin-2-one (3I) and 1,3,6-trimethyl-3-(2,2,3,3,4,4,5,5,5-nonafluoropentyl)indolin-2-one (3I')

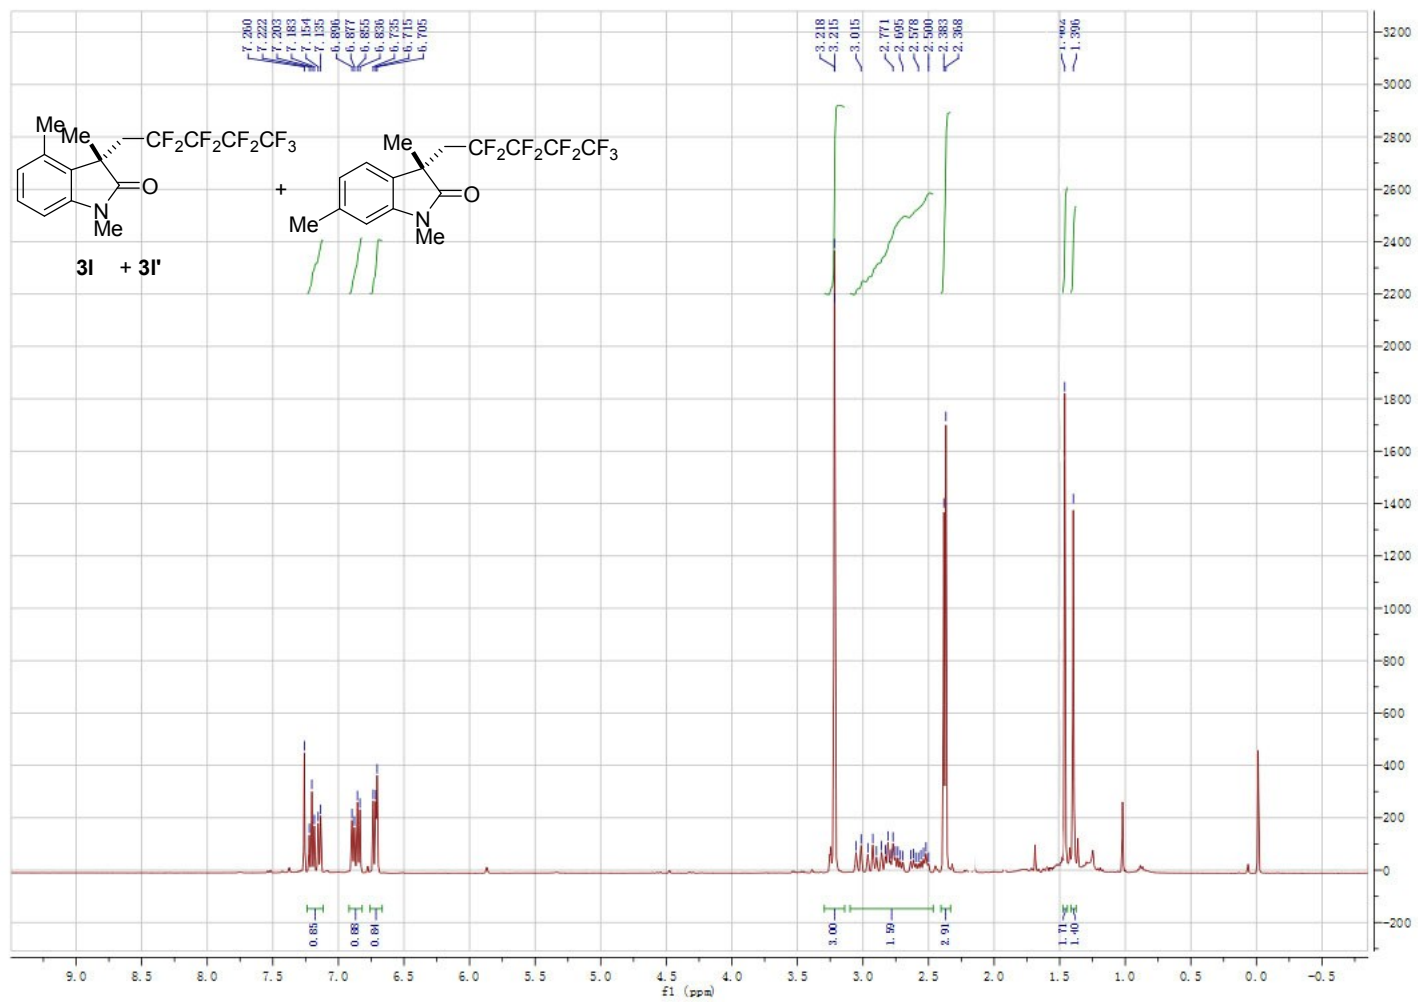

mixture of 1,3,4-trimethyl-3-(2,2,3,3,4,4,5,5,5-nonafluoropentyl)indolin-2-one (3I) and 1,3,6-trimethyl-3-(2,2,3,3,4,4,5,5,5-nonafluoropentyl)indolin-2-one (3I')

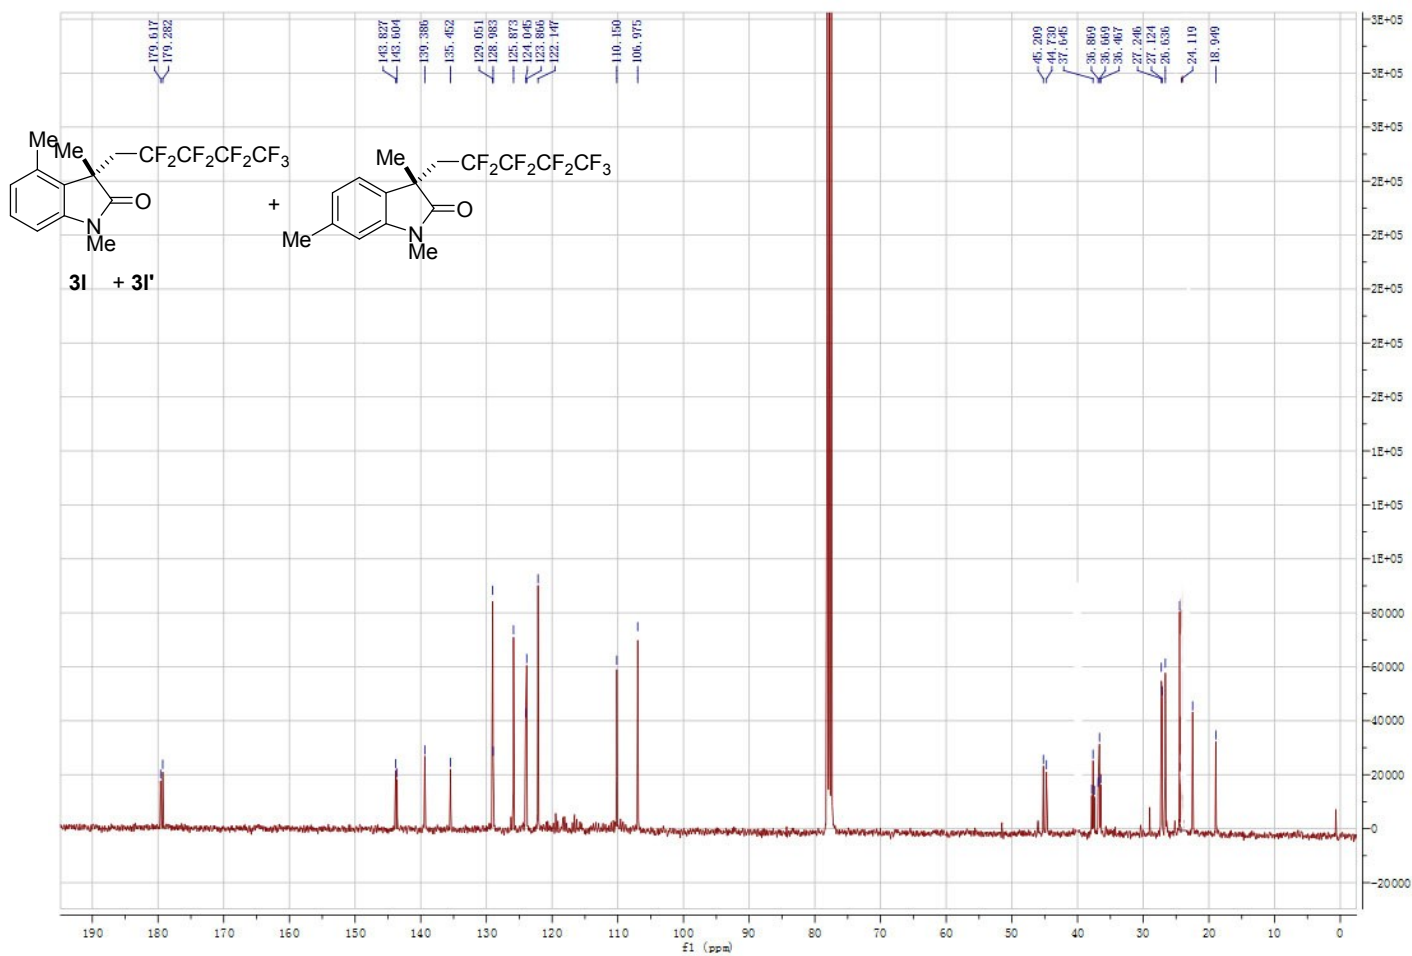

mixture of

**1,3,4-trimethyl-3-(2,2,3,3,4,4,5,5,5-nonafluoropentyl)indolin-2-one (3I) and 1,3,6-trimethyl-3-(2,2,3,3,4,4,5,5,5-nonafluoropentyl)indolin-2-one (3I')**

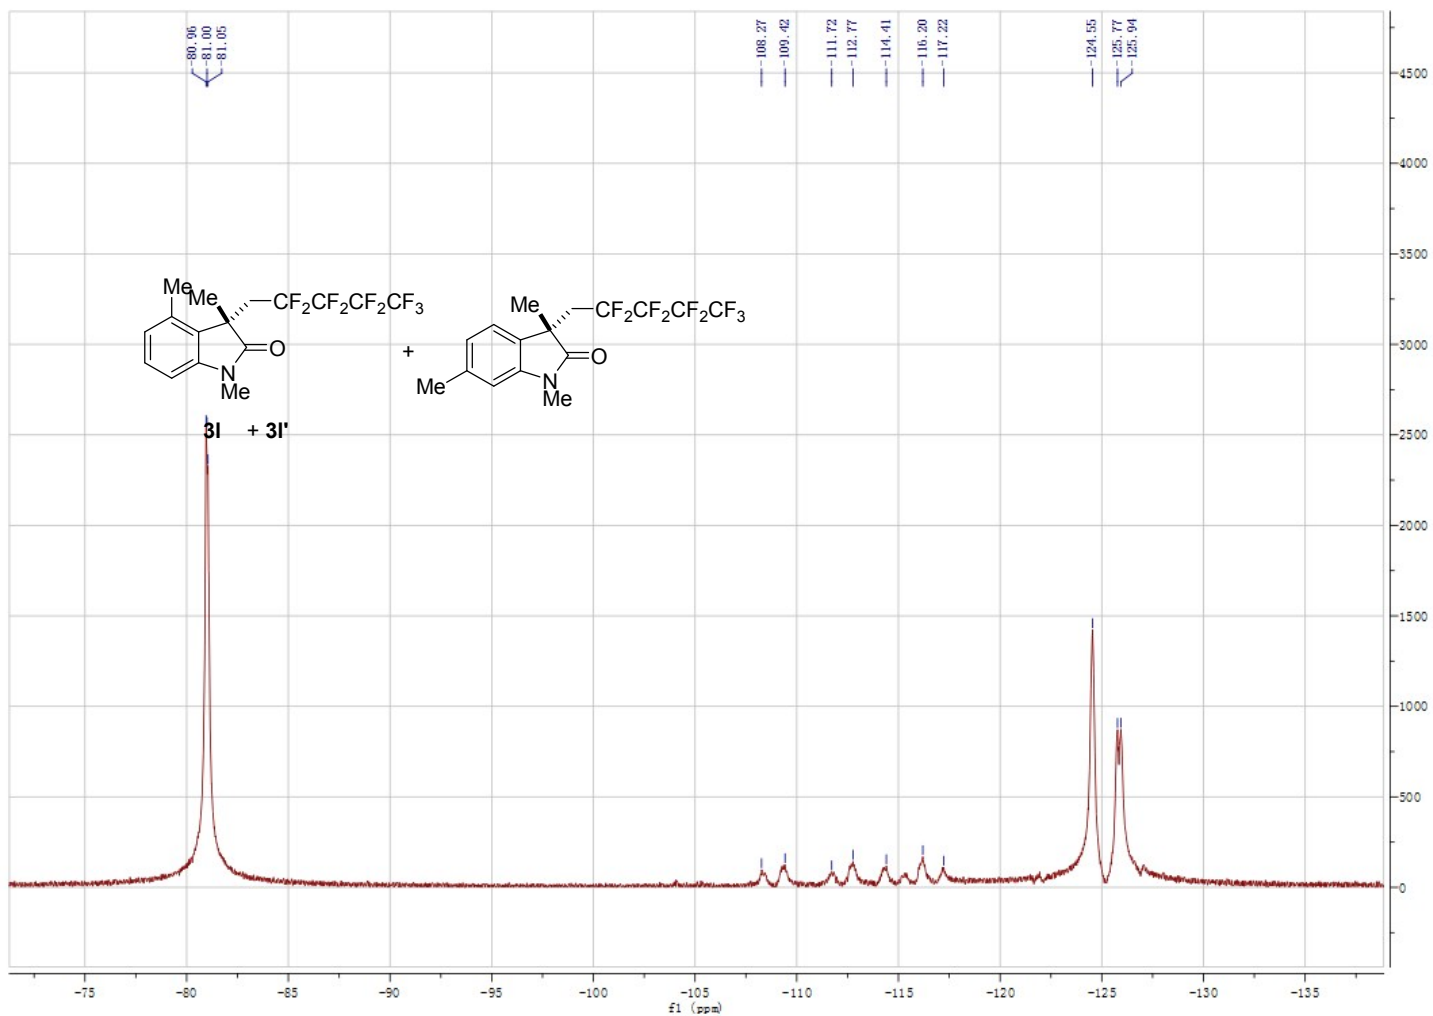

4-chloro-1,3,7-trimethyl-3-(2,2,3,3,4,4,5,5,5-nonafluoropentyl)indolin-2-one (3m)

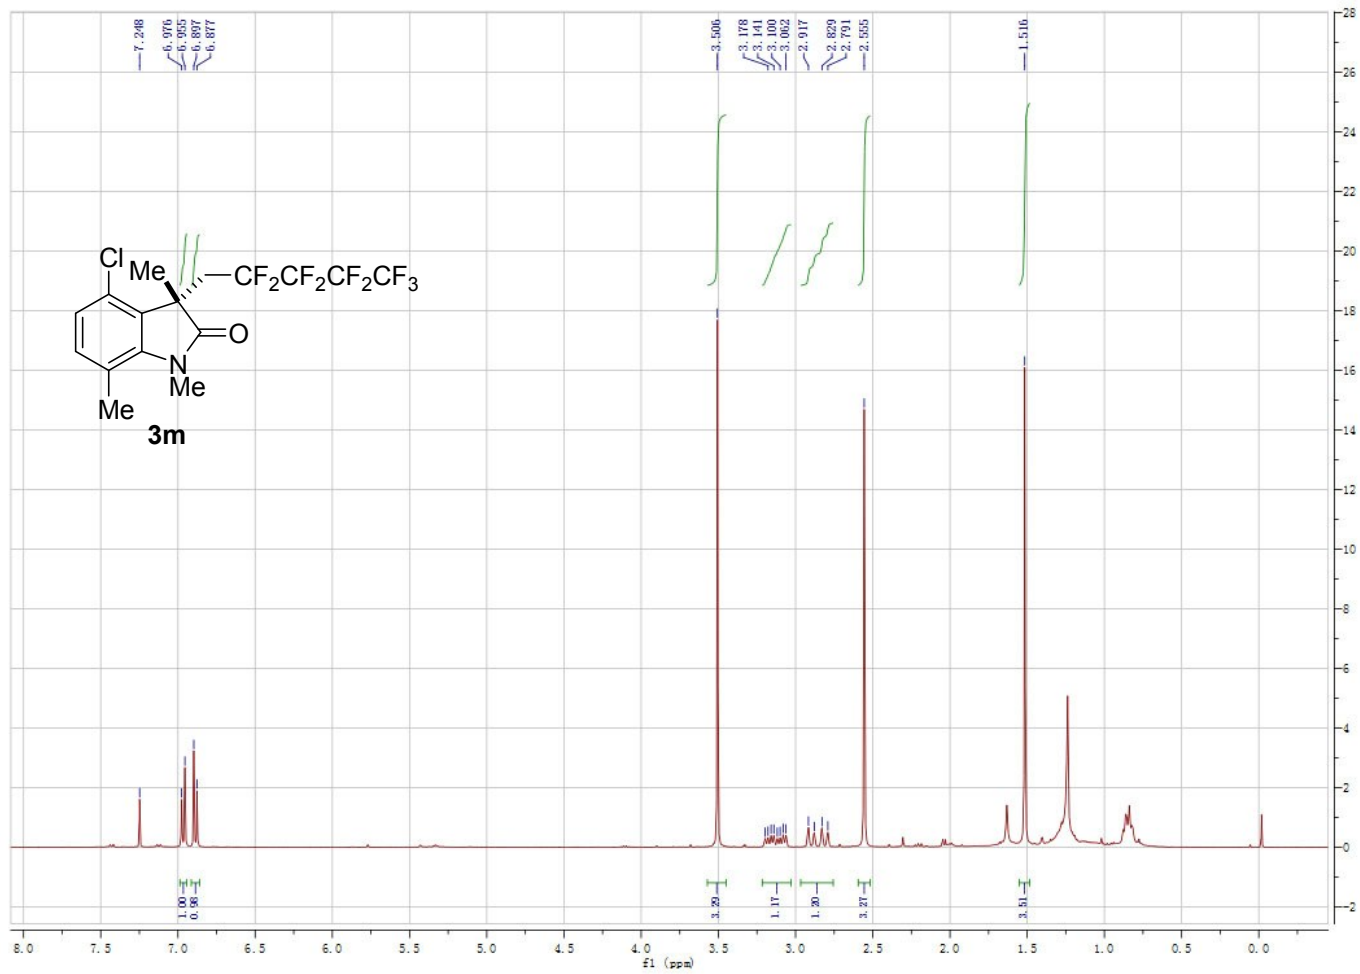

4-chloro-1,3,7-trimethyl-3-(2,2,3,3,4,4,5,5,5-nonafluoropentyl)indolin-2-one (3m)

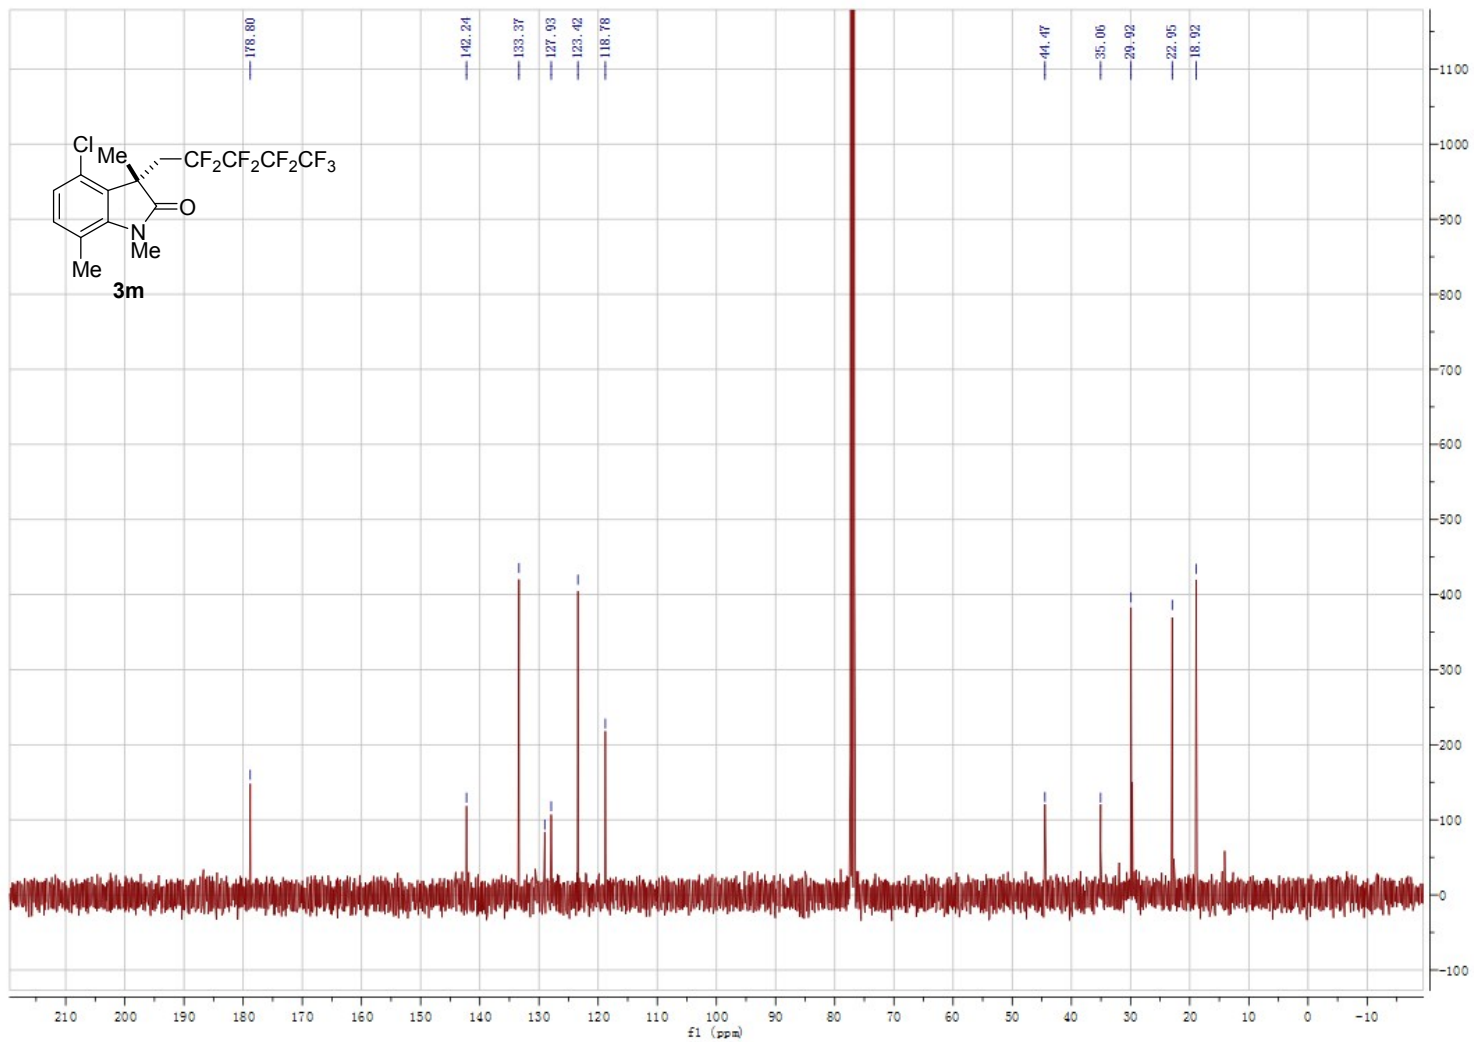

4-chloro-1,3,7-trimethyl-3-(2,2,3,3,4,4,5,5,5-nonafluoropentyl)indolin-2-one (3m)

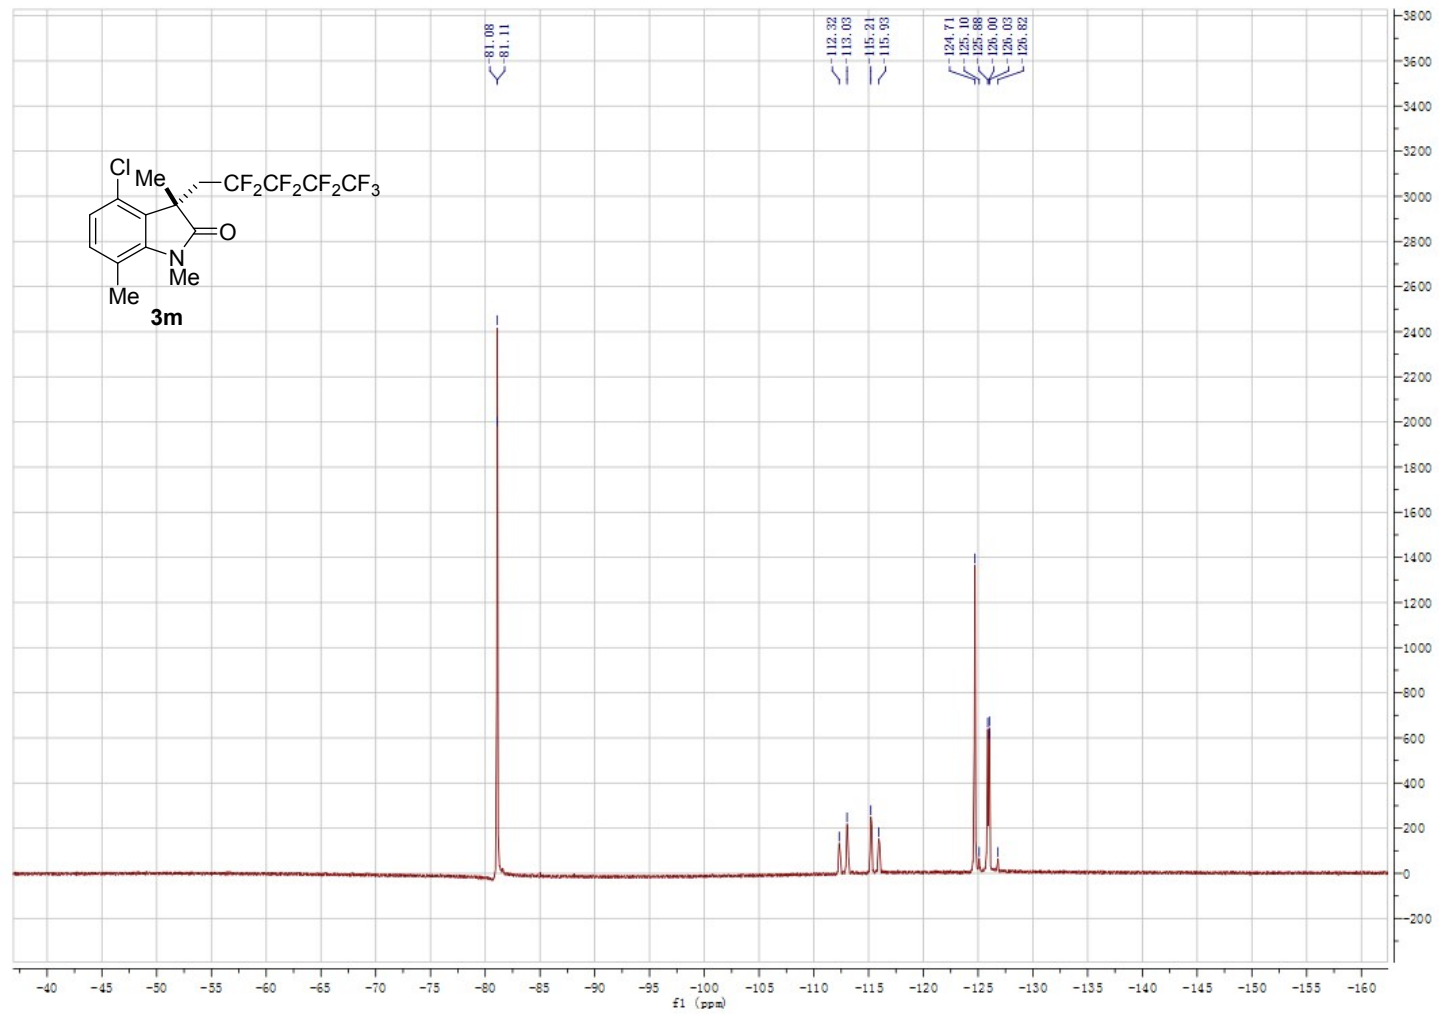

1,3-dimethyl-3-(2,2,3,3,4,4,5,5,5-nonafluoropentyl)-1H-pyrrolo[2,3-b]pyridin-2(3H)-one (3n)

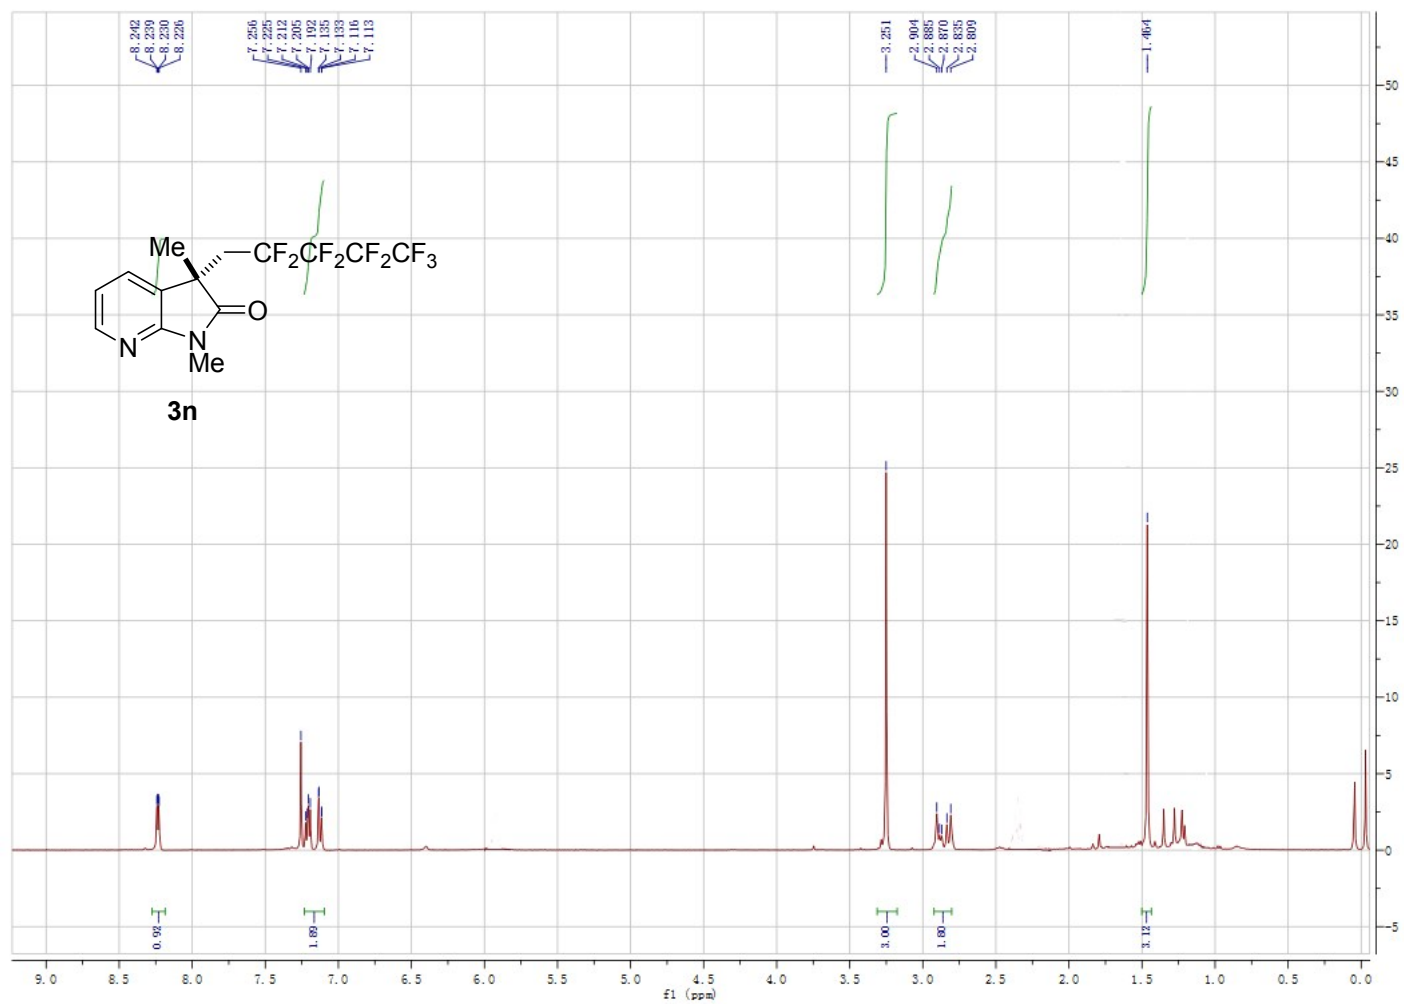

1,3-dimethyl-3-(2,2,3,3,4,4,5,5,5-nonafluoropentyl)-1H-pyrrolo[2,3-b]pyridin-2(3H)-one (3n)

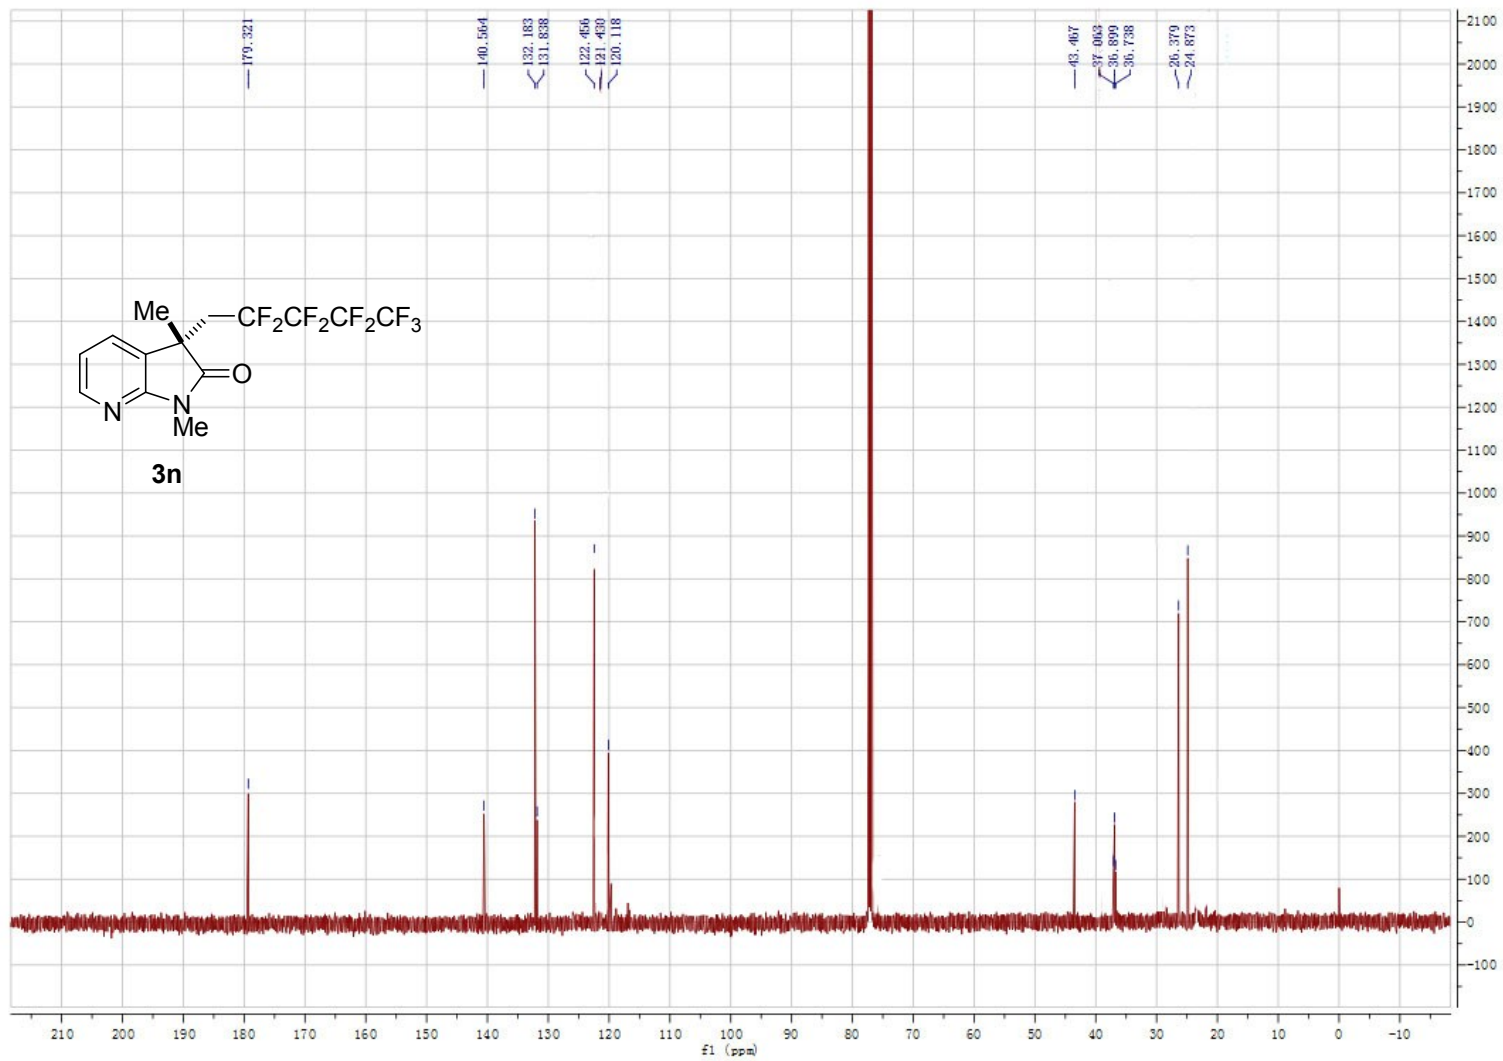



1,3-dimethyl-3-(2,2,3,3,4,4,5,5,5-nonafluoropentyl)-1H-pyrrolo[2,3-b]pyridin-2(3H)-one (3n)

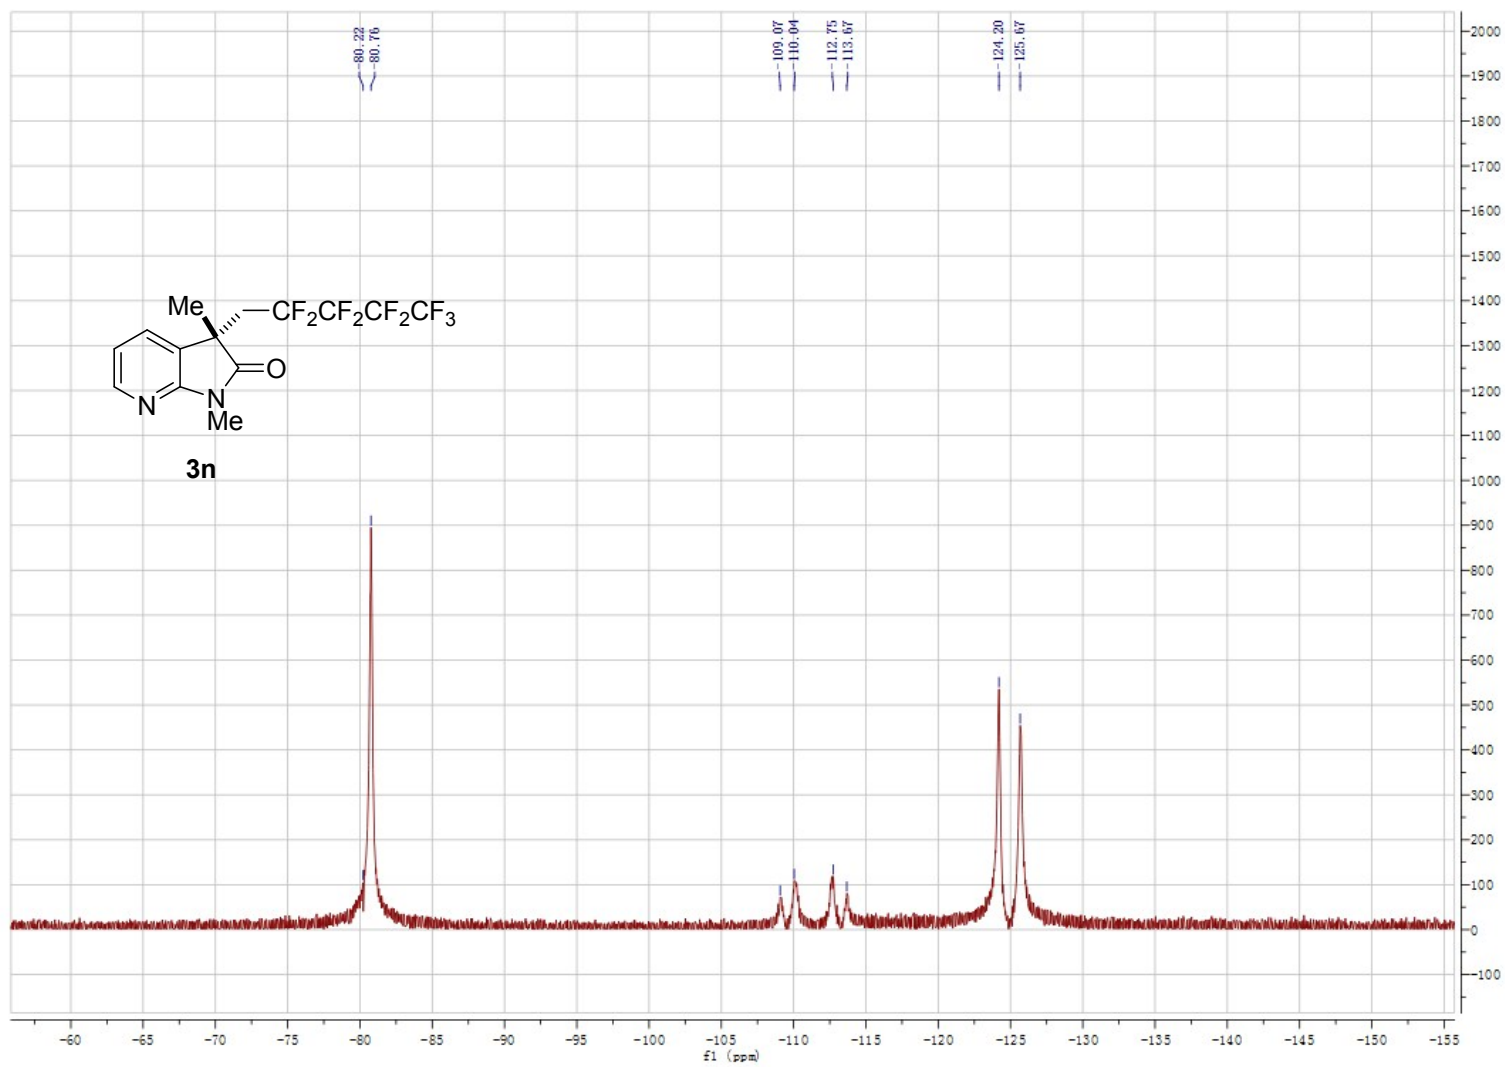

(1-Methyl-3-(2,2,3,3,4,4,5,5,5-nonafluoropentyl)-2-oxindolin-3-yl)methyl acetate (3o)

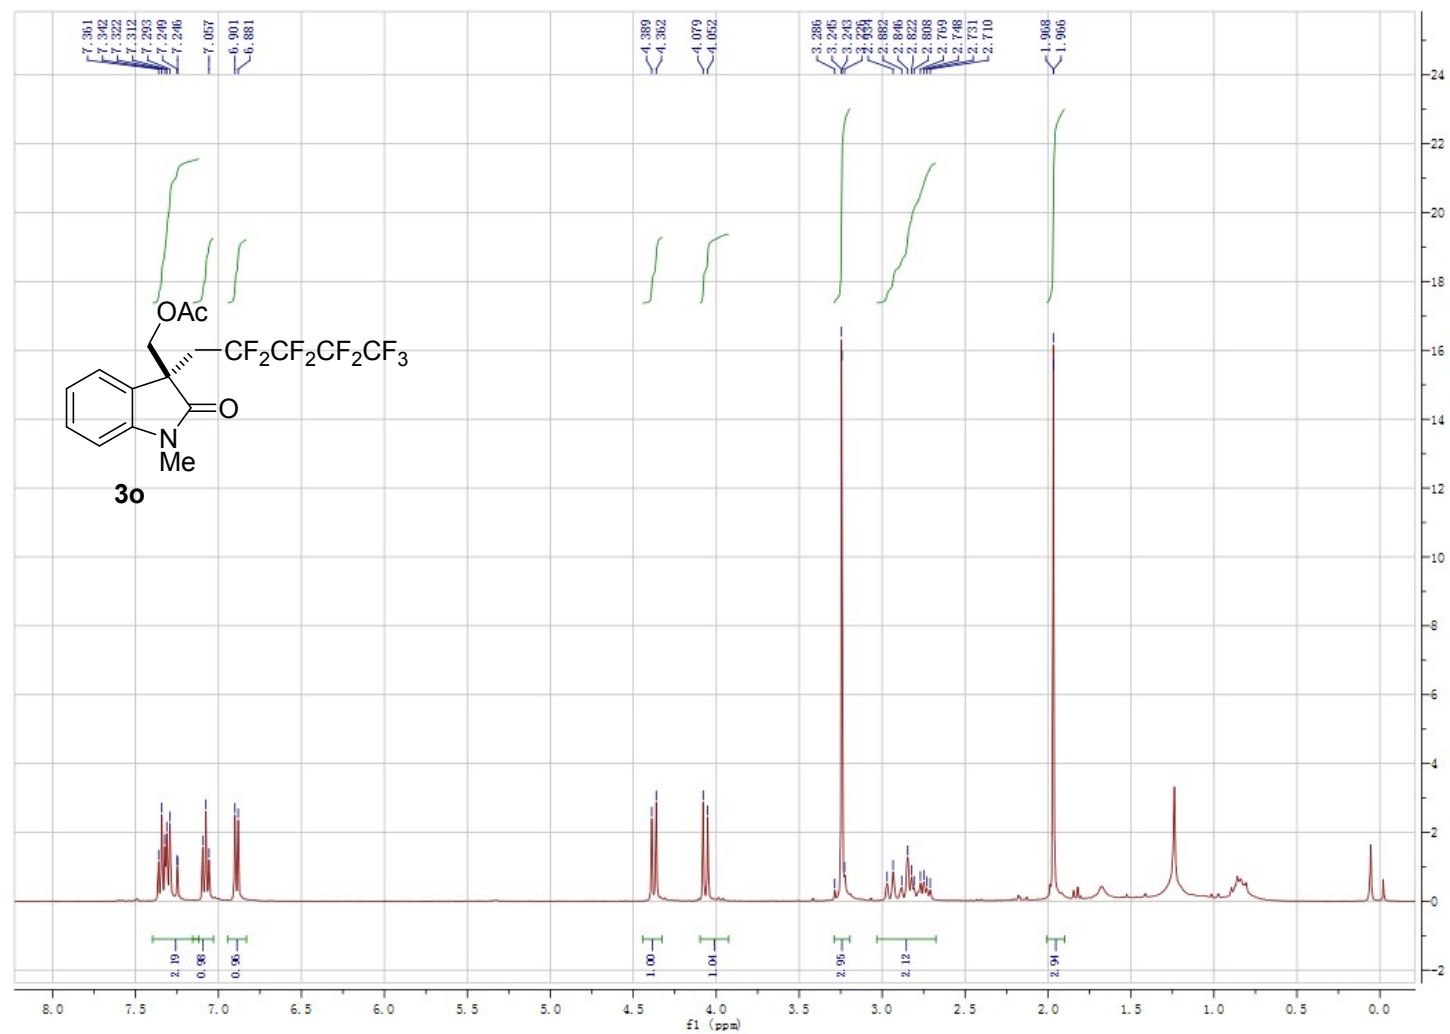

**(1-Methyl-3-(2,2,3,3,4,4,5,5,5-nonafluoropentyl)-2-oxindolin-3-yl)methyl acetate (3o)**

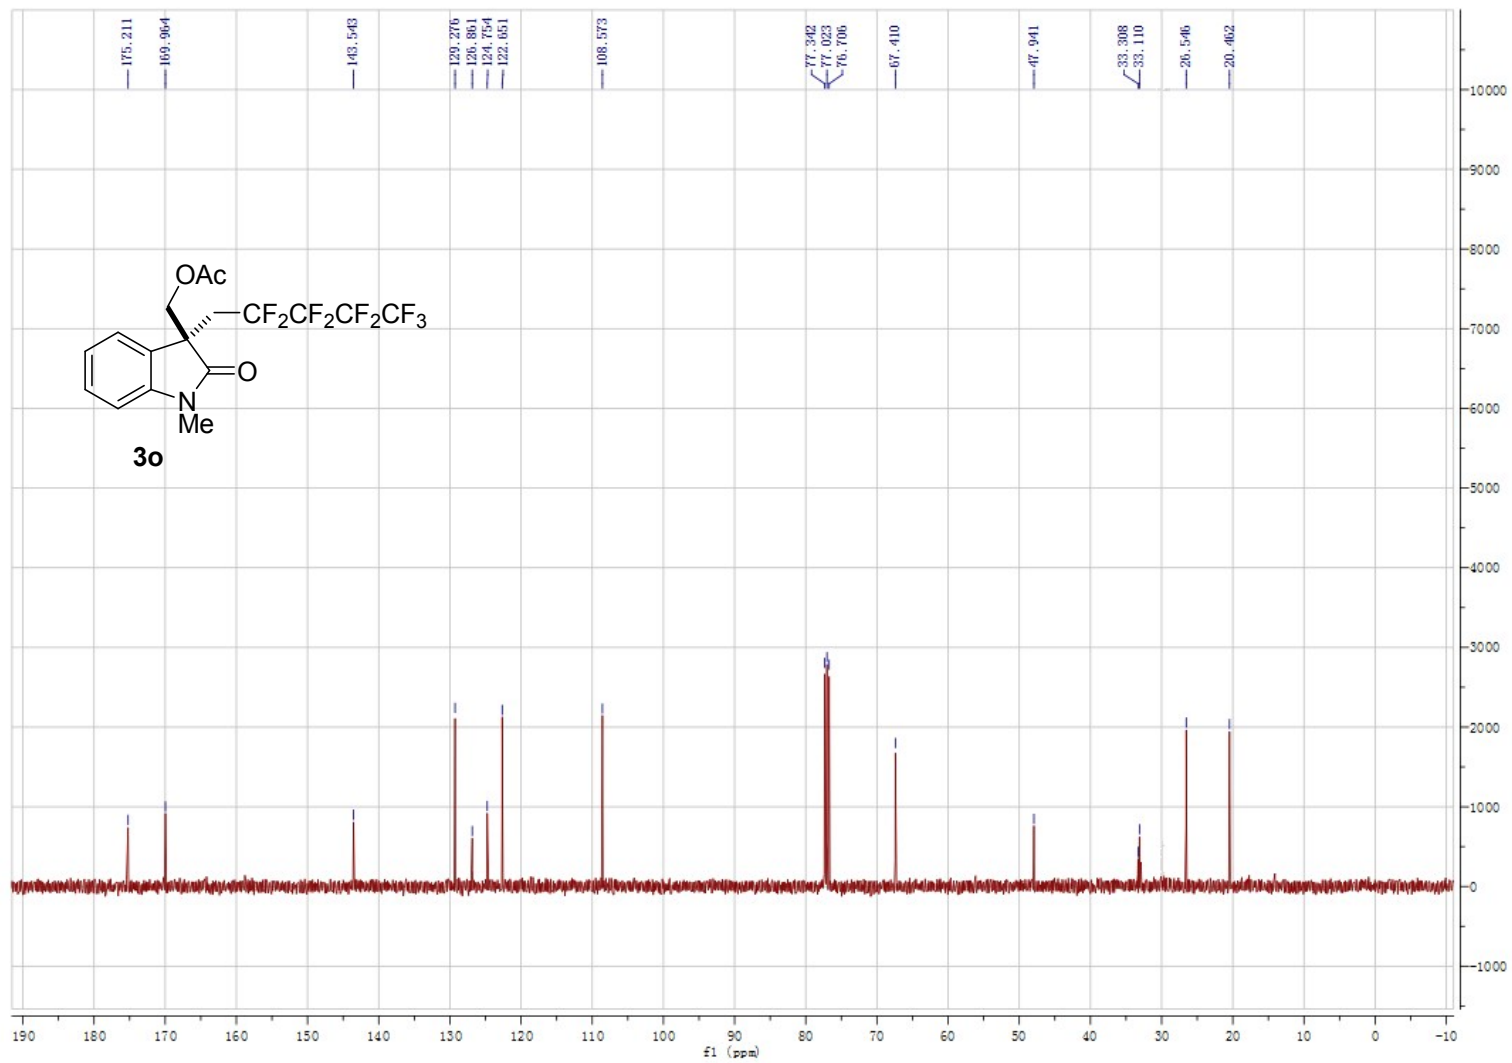

(1-Methyl-3-(2,2,3,3,4,4,5,5,5-nonafluoropentyl)-2-oxindolin-3-yl)methyl acetate (3o)

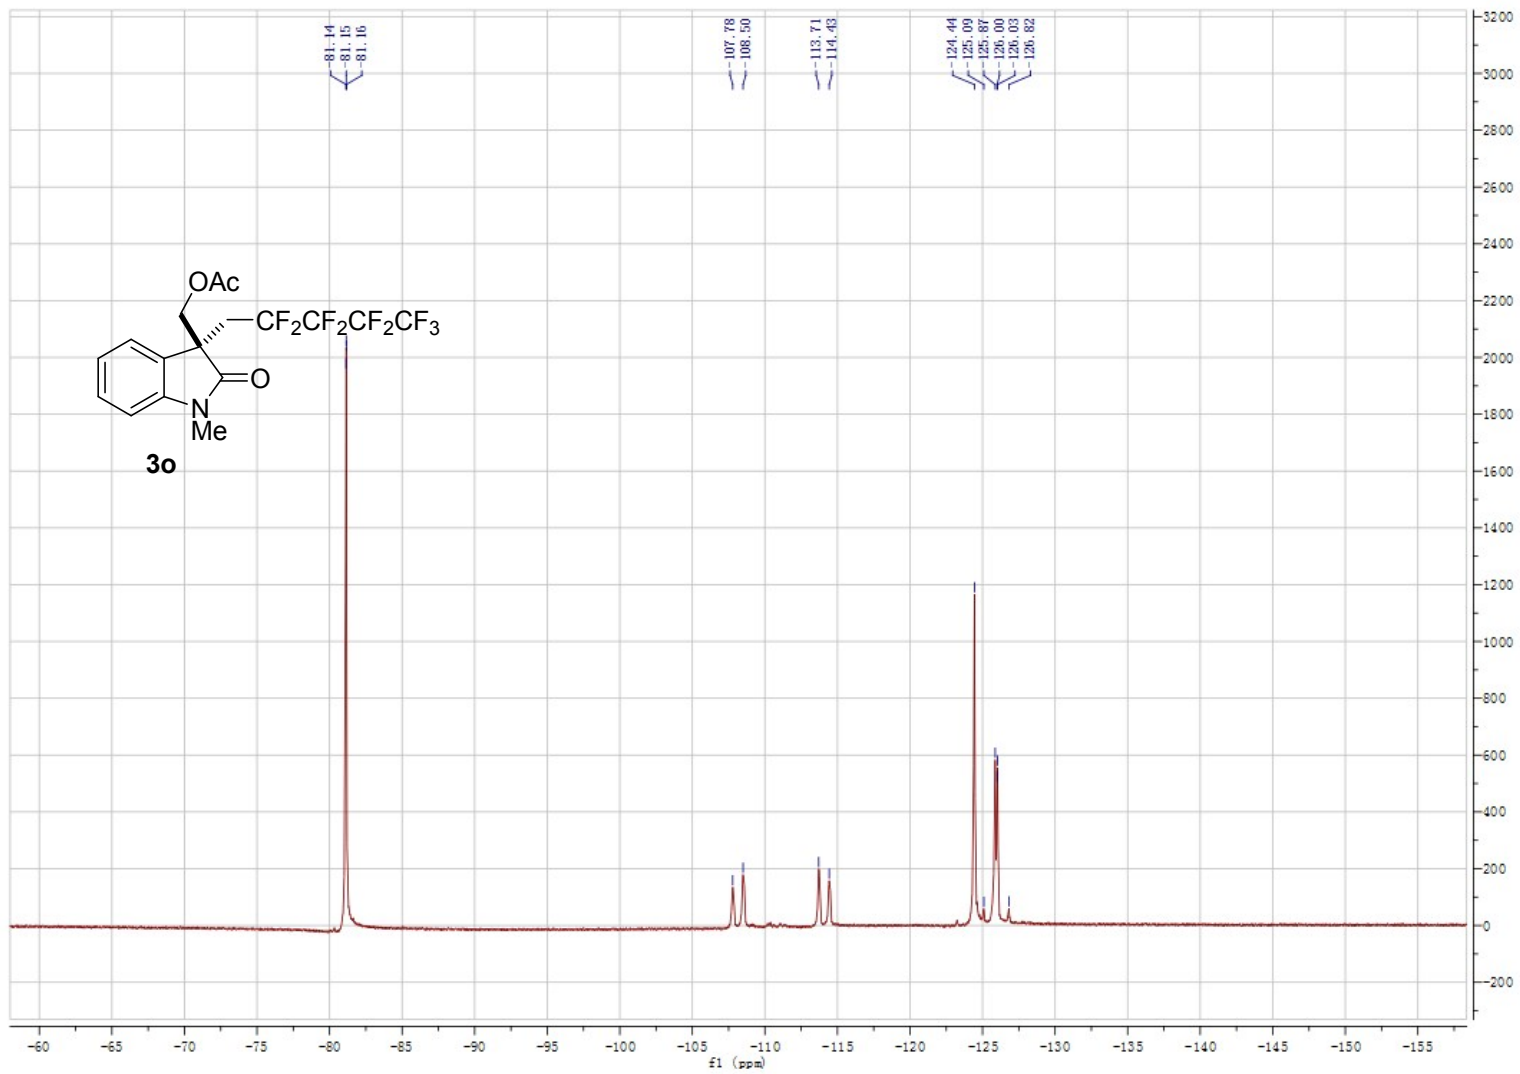

# 1,3-dimethyl-3-(2,2,2-trifluoroethyl)indolin-2-one (3q)

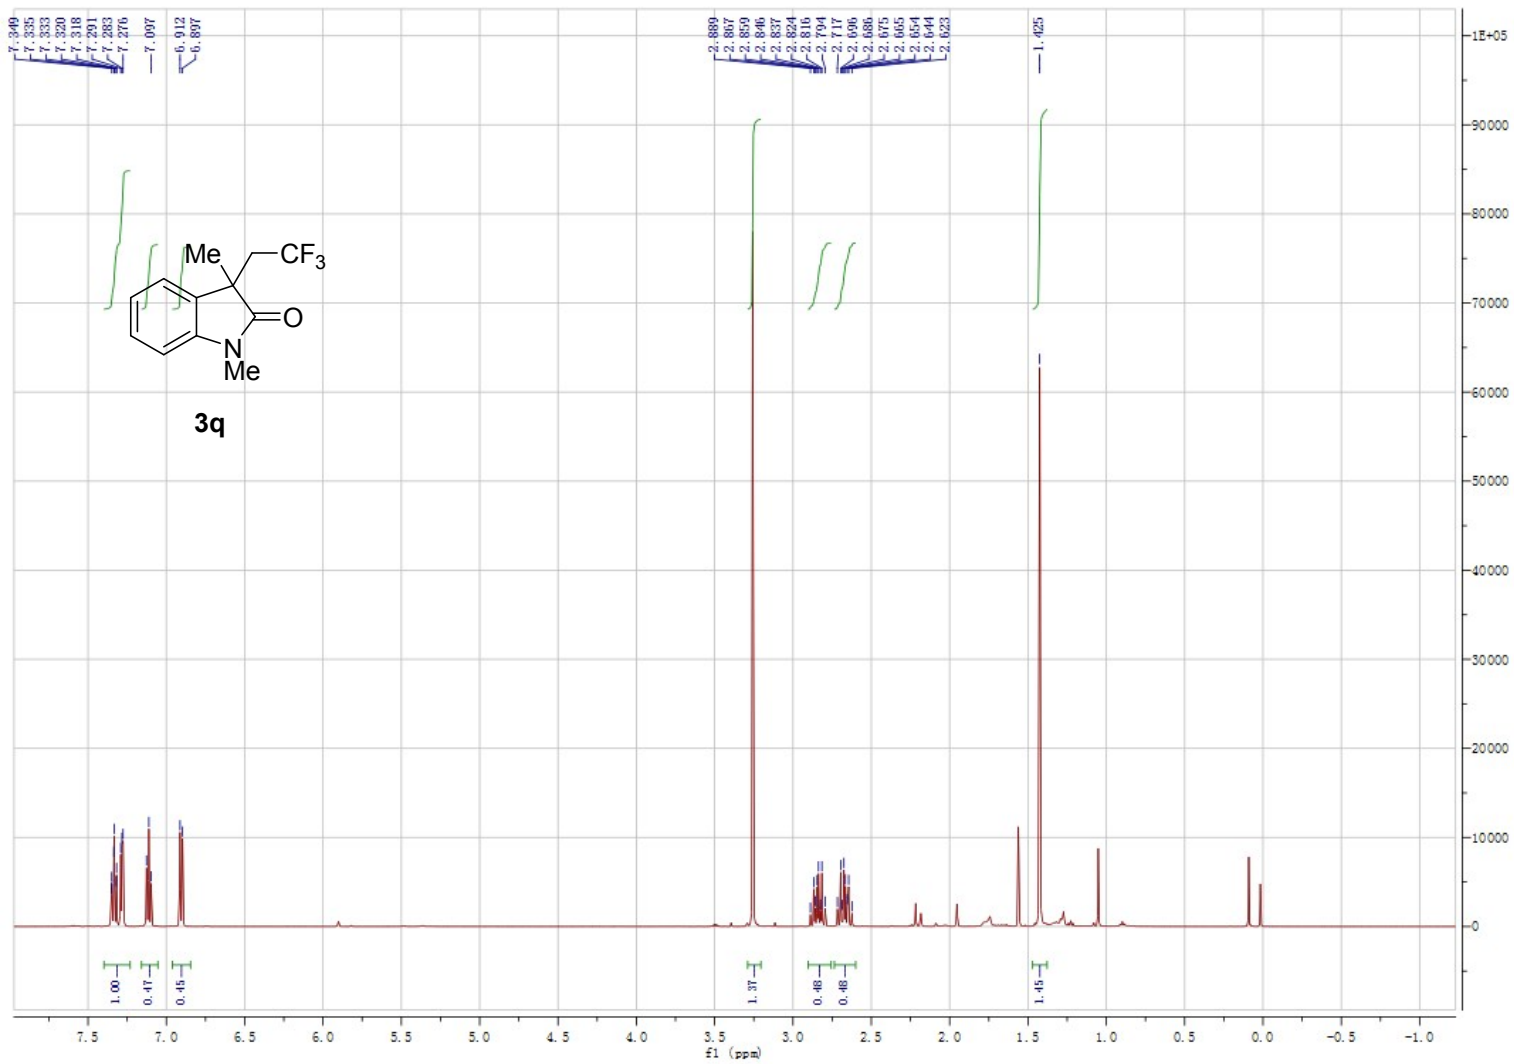

# 1,3-dimethyl-3-(2,2,2-trifluoroethyl)indolin-2-one (3q)

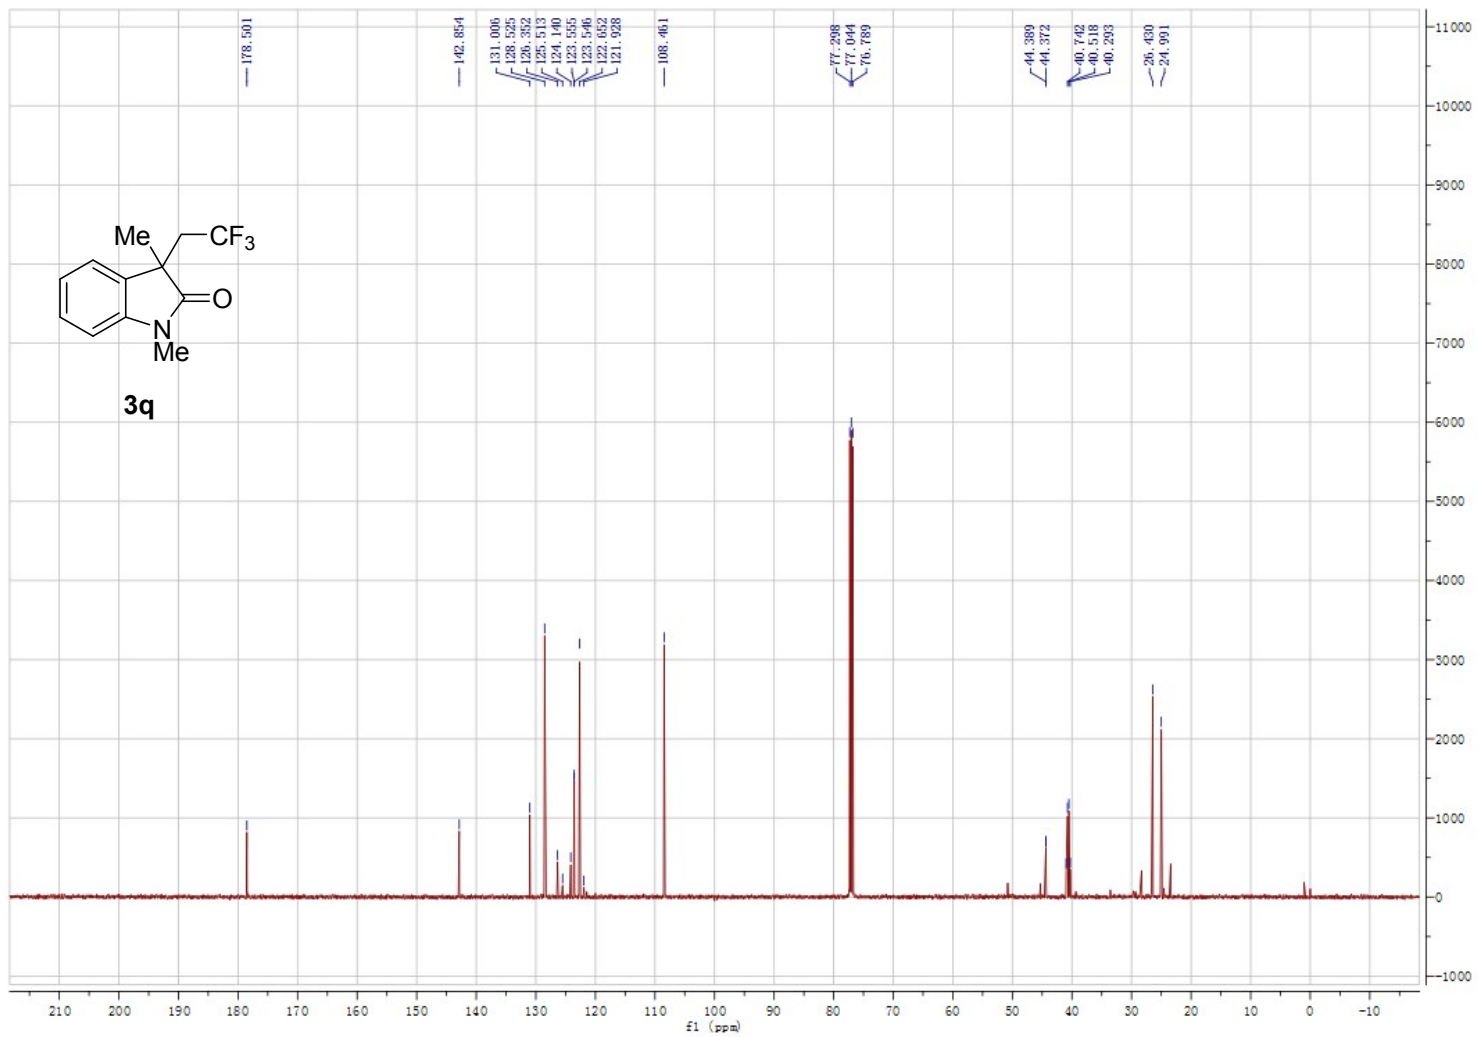

# 1,3,5-trimethyl-3-(2,2,2-trifluoroethyl)indolin-2-one (3r)

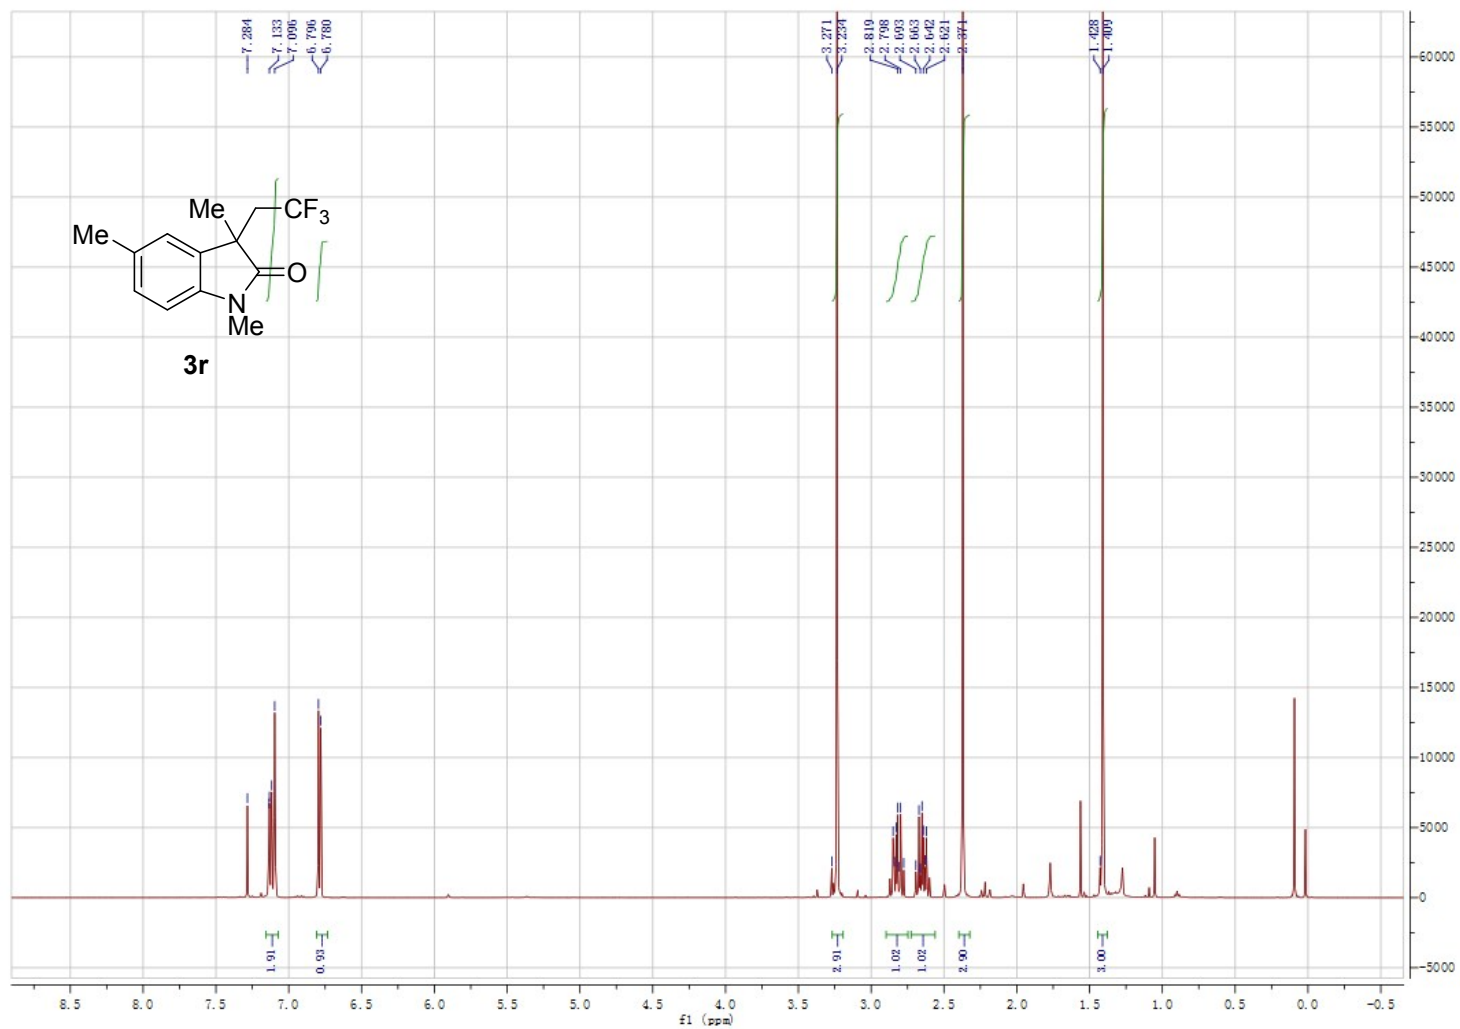

# 1,3,5-trimethyl-3-(2,2,2-trifluoroethyl)indolin-2-one (3r)

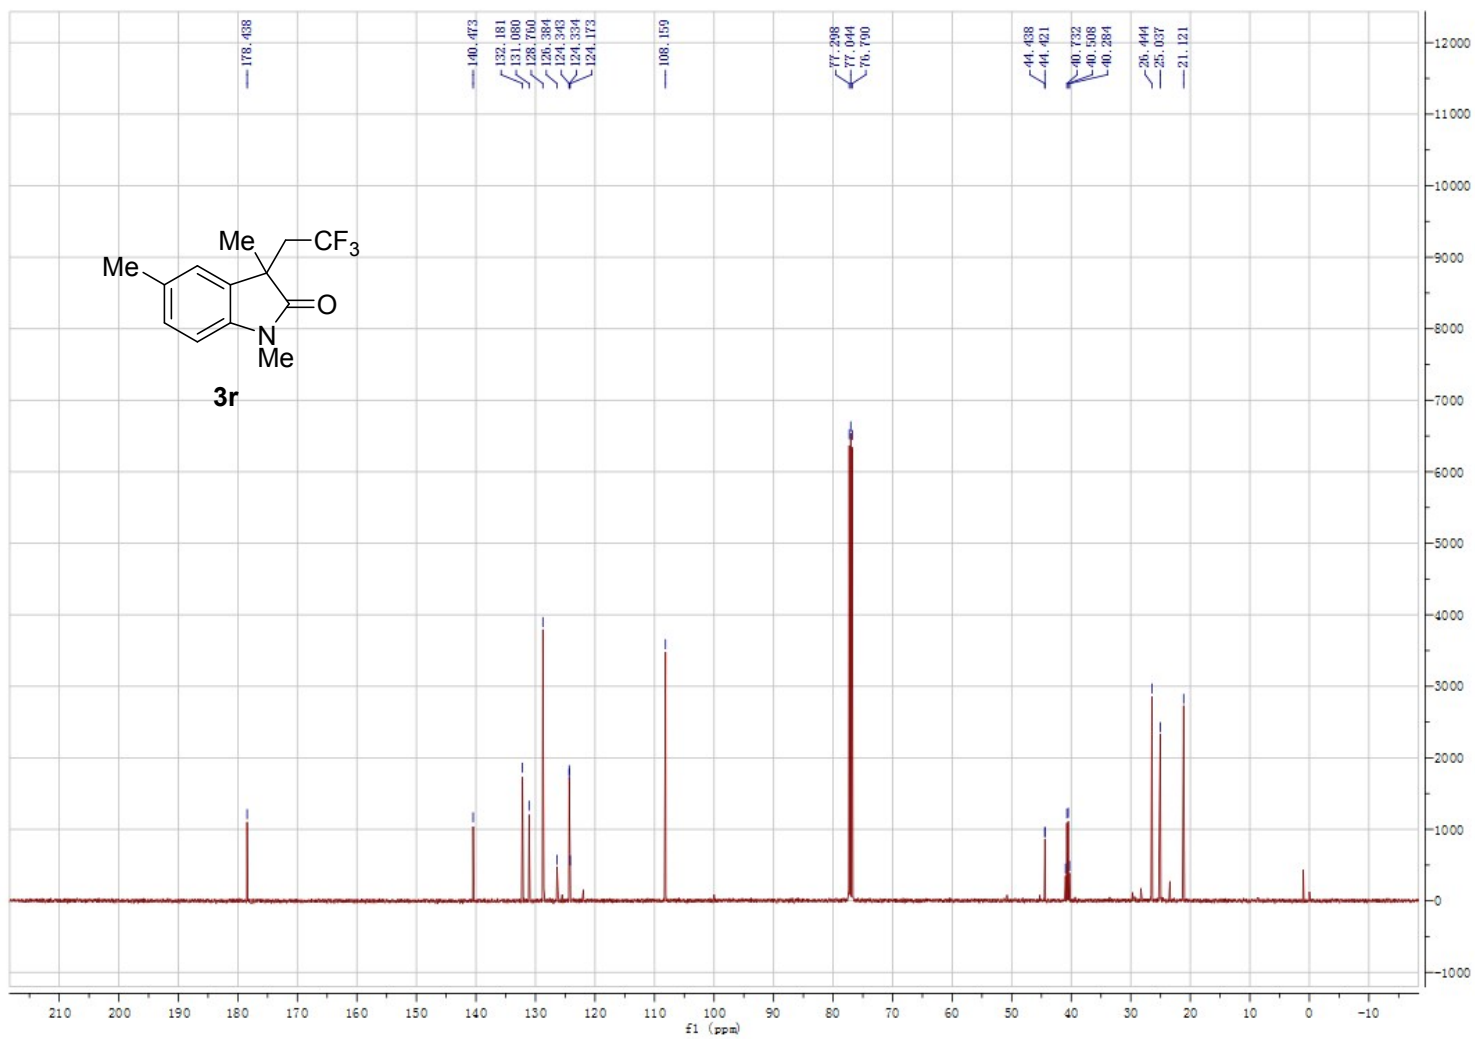



**3-(2,2,3,3,4,4,4-heptafluorobutyl)-1,3,7-trimethylindolin-2-one (3s)**

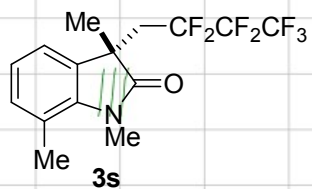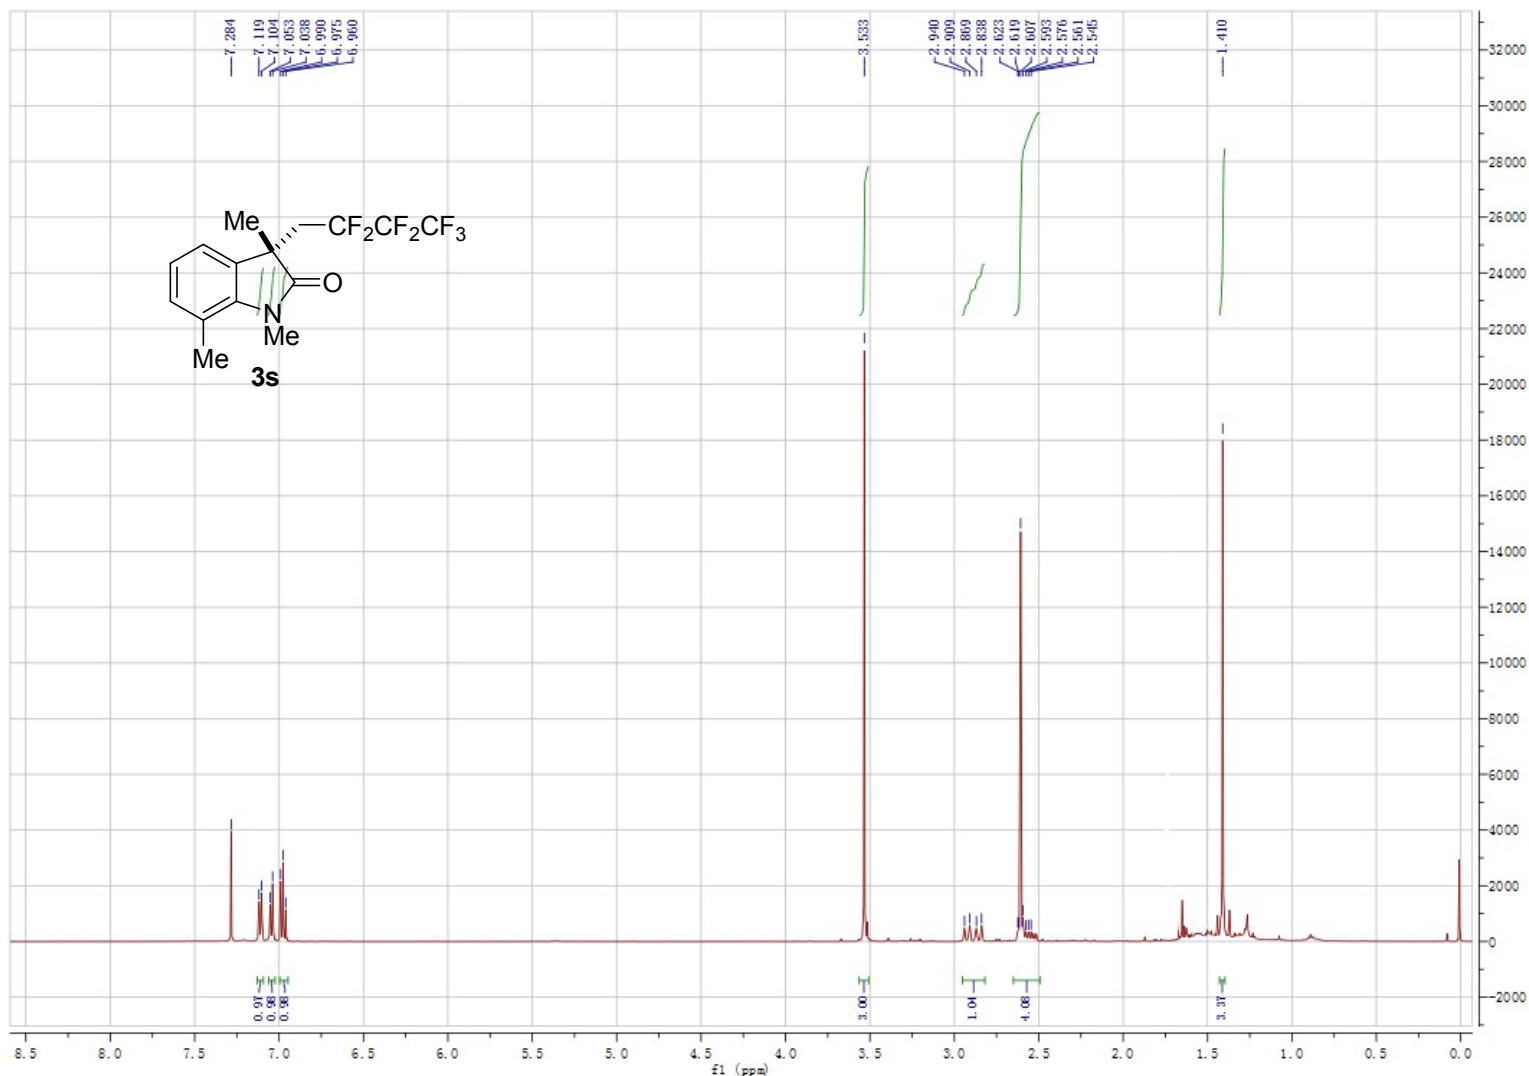

3-  
(2,2,

### 3,3,4,4,4-heptafluorobutyl)-1,3,7-trimethylindolin-2-one (3s)

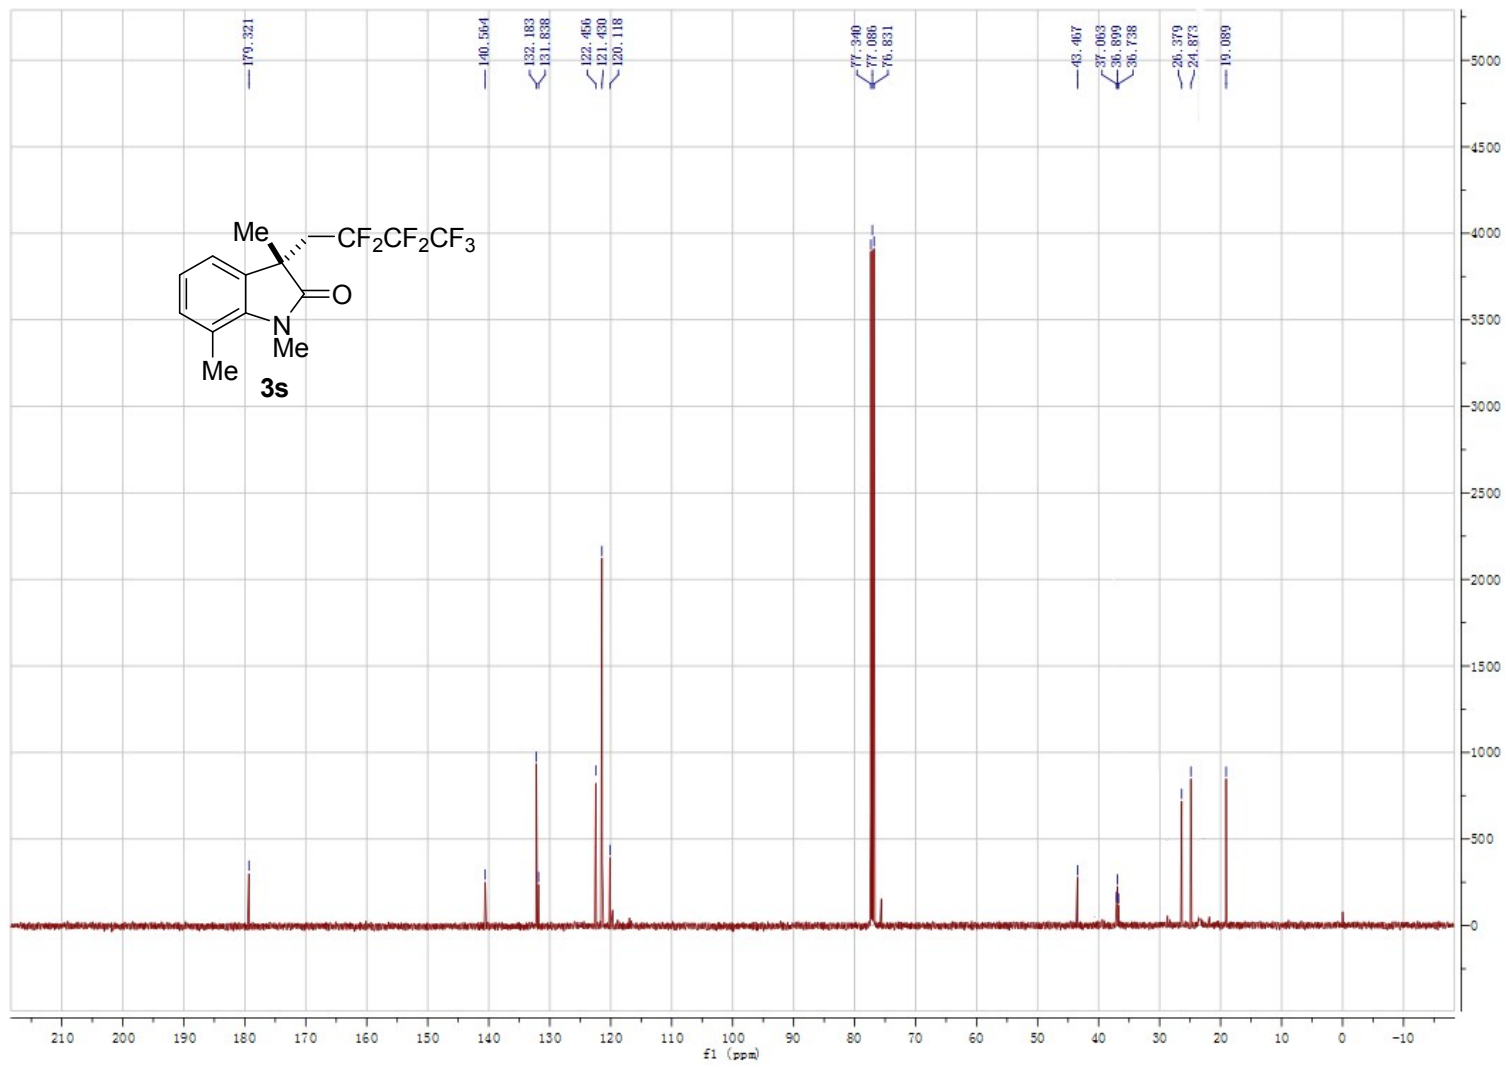

### 3-(2,2,3,3,4,4,4-heptafluorobutyl)-1,3,7-trimethylindolin-2-one (3s)

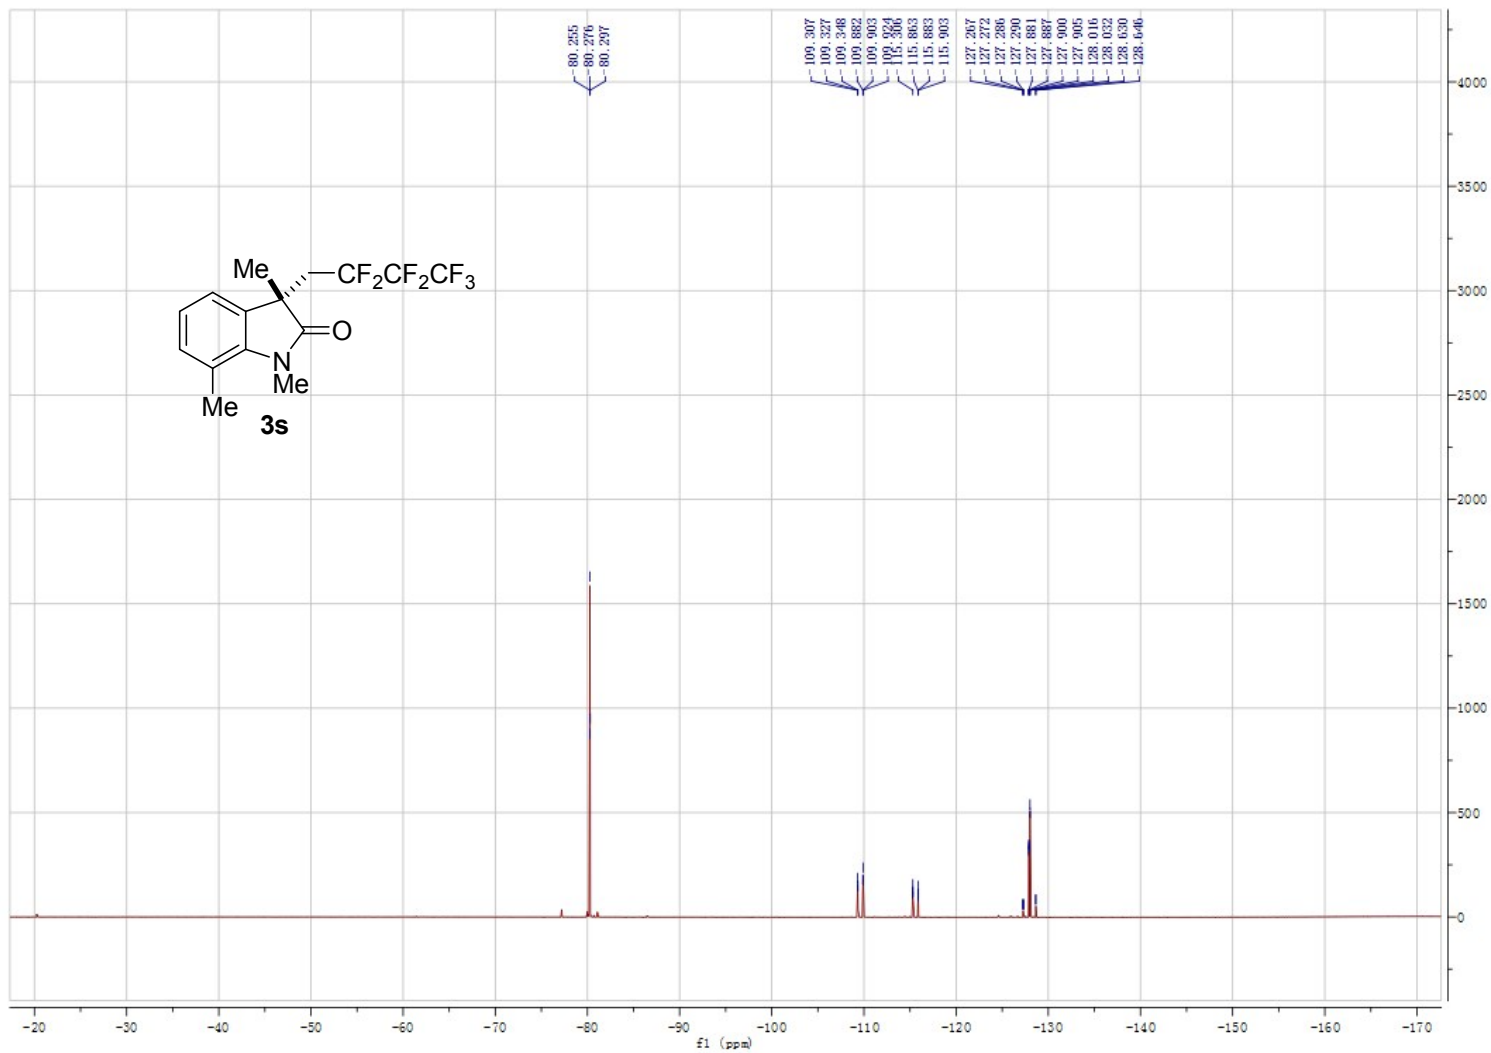



methoxy-1,3-dimethyl-3-(2,2,3,3,4,4,5,5,6,6,7,7,7-tridecafluoroheptyl)indolin-2-one (3t)

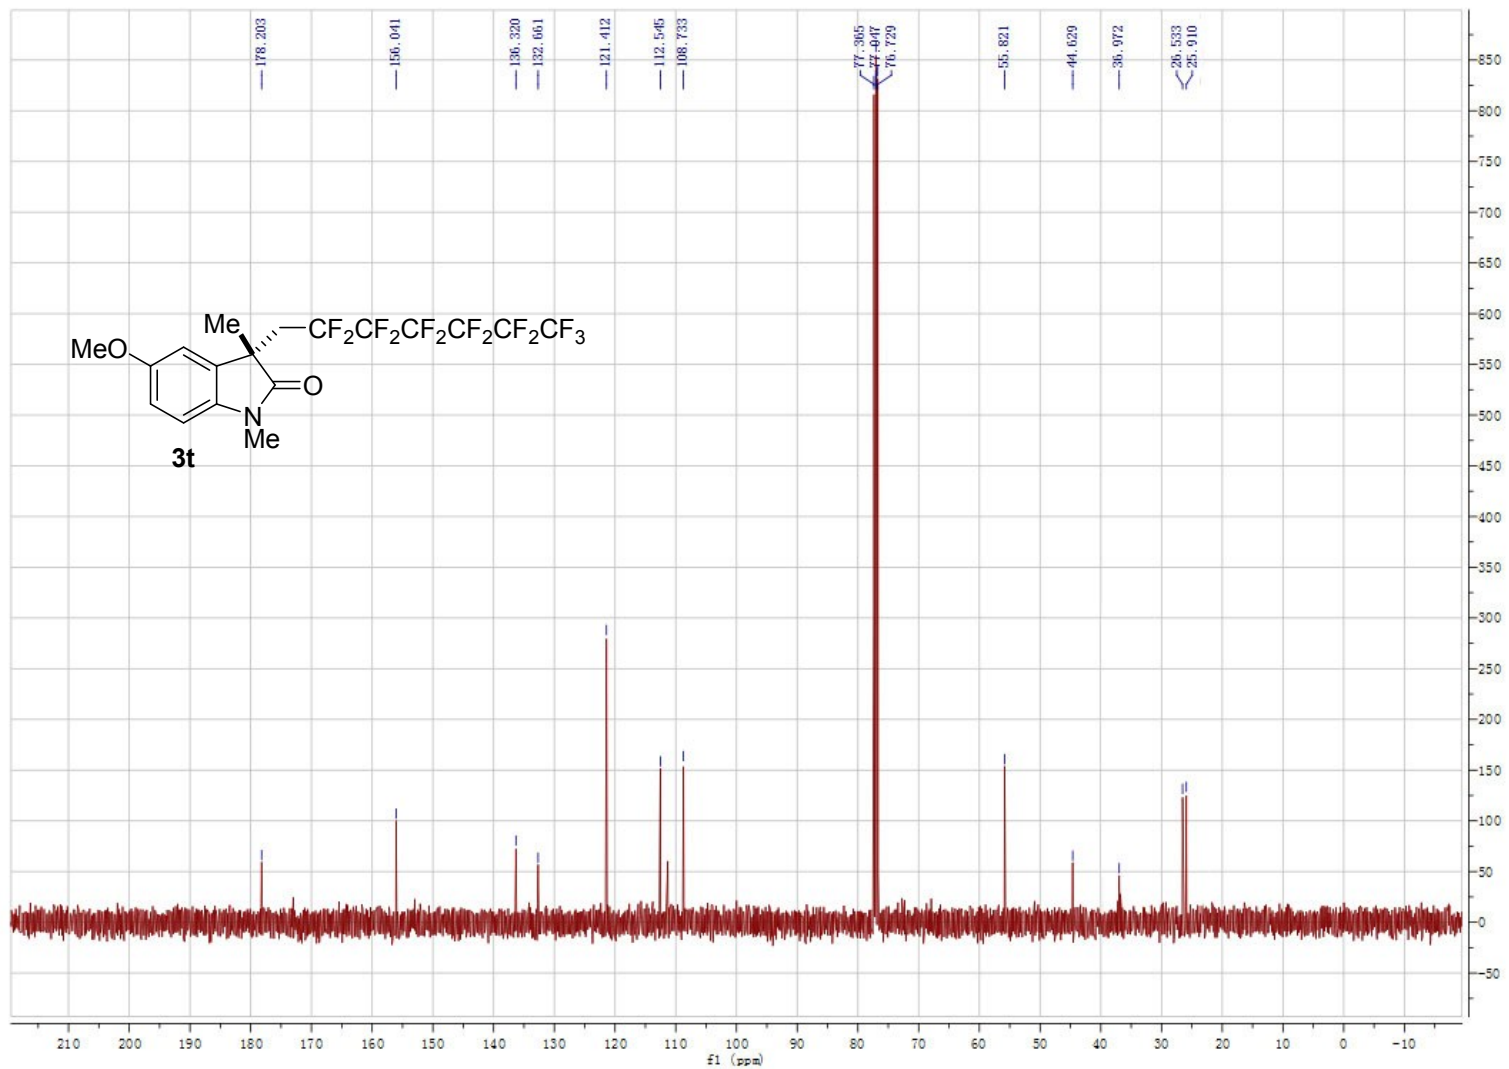

5-methoxy-1,3-dimethyl-3-(2,2,3,3,4,4,5,5,6,6,7,7,7-tridecafluoroheptyl)indolin-2-one (3t)

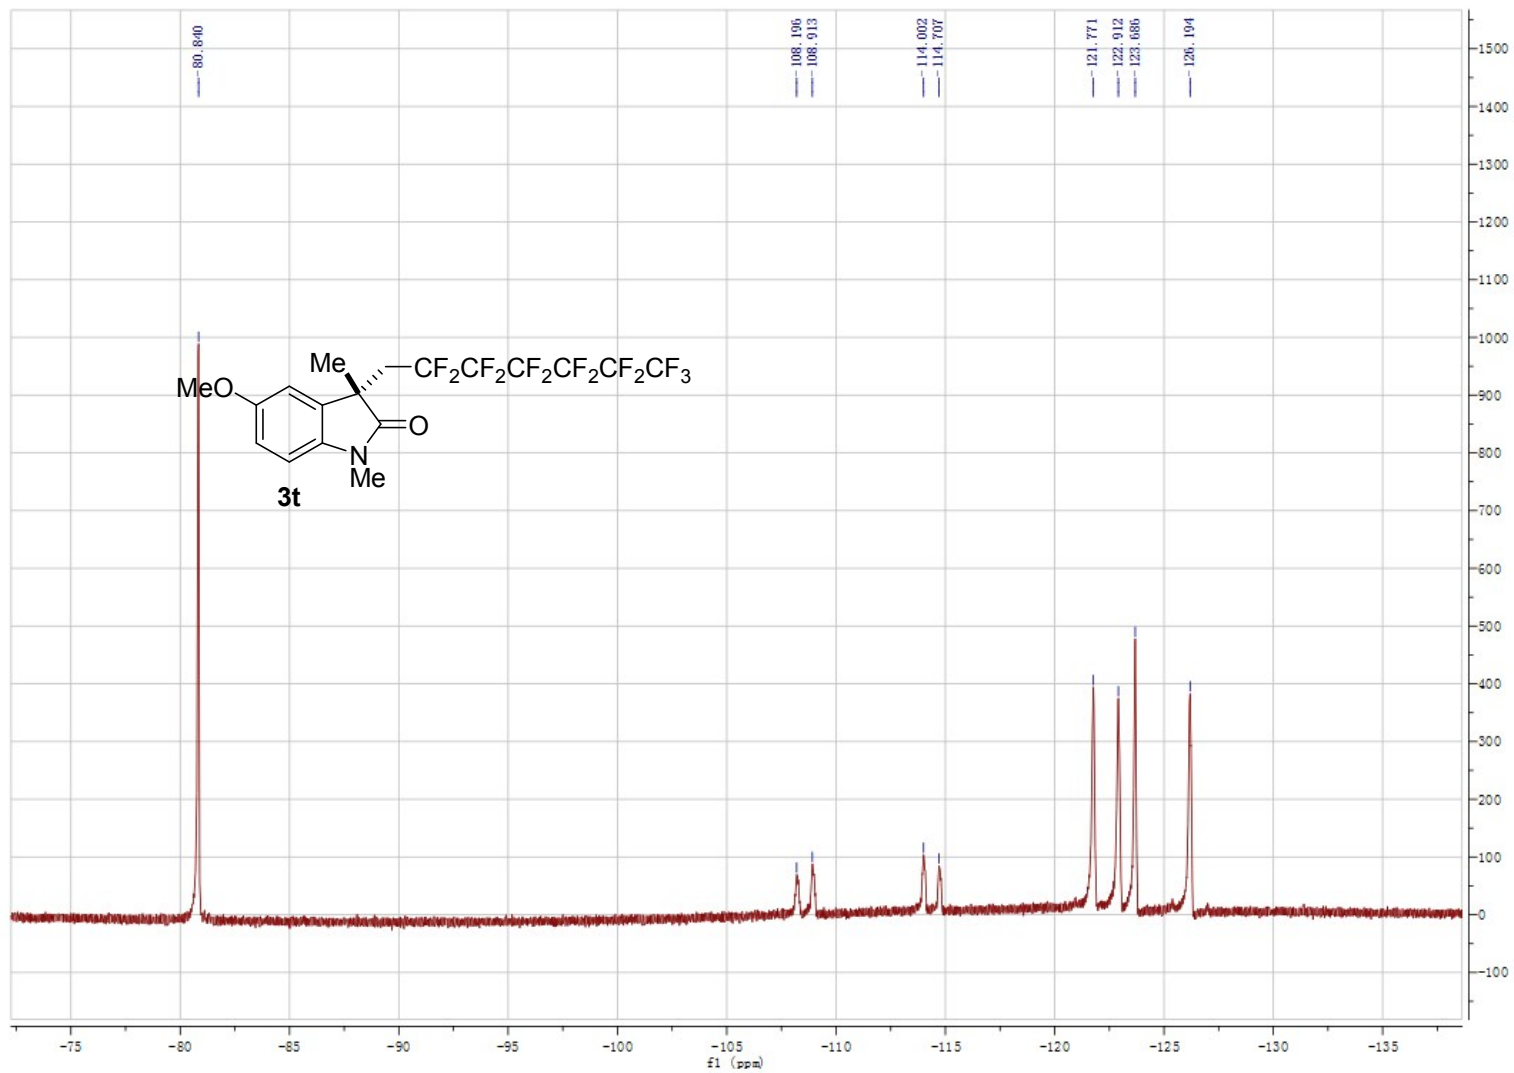

1,3-dimethyl-3-(2,2,3,3,4,4,5,5,6,6,7,7,7-tridecafluoroheptyl)-1H-pyrrolo[2,3-c]pyridin-2(3H)-one (3u).

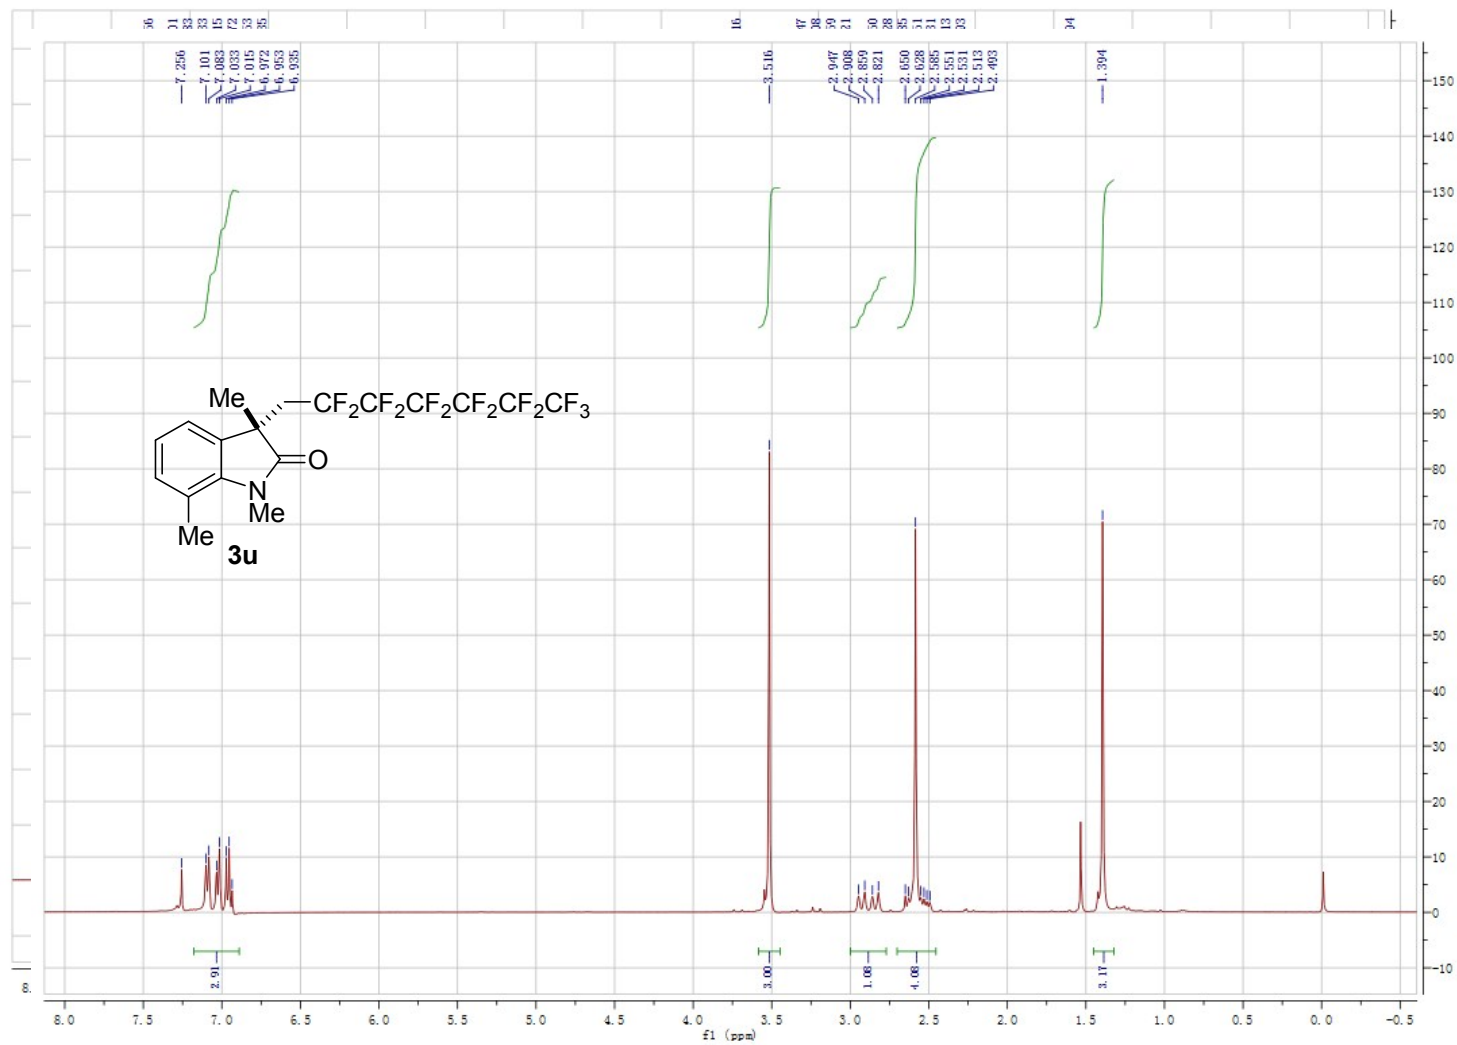

**1,3-dimethyl-3-(2,2,3,3,4,4,5,5,6,6,7,7,7-tridecafluoroheptyl)-1H-pyrrolo[2,3-c]pyridin-2(3H)-one (3u).**

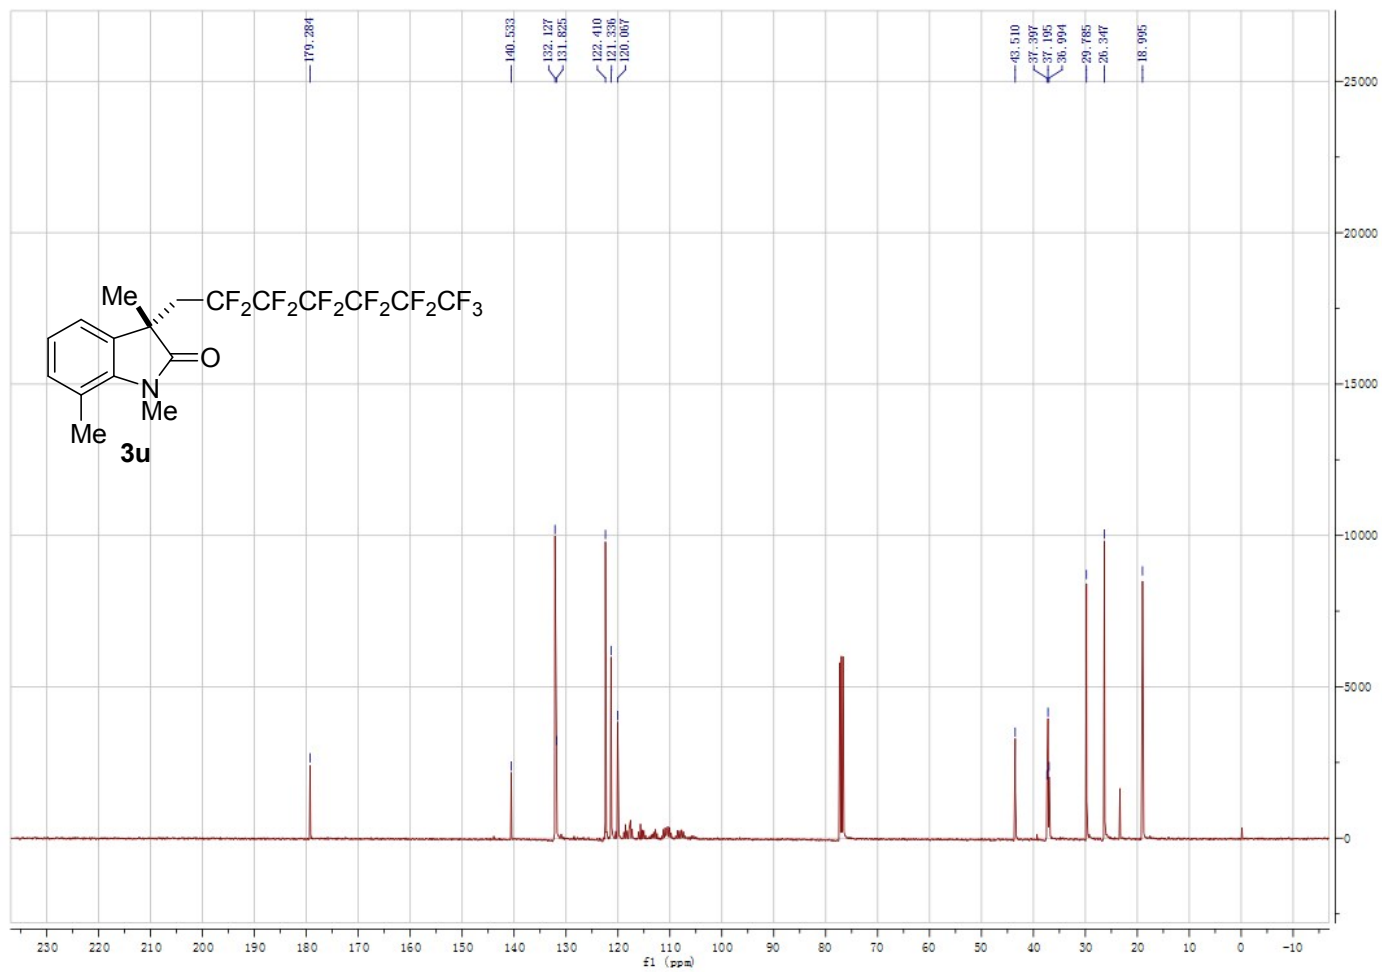



**1,3-dimethyl-3-(2,2,3,3,4,4,5,5,6,6,7,7,7-tridecafluoroheptyl)-1H-pyrrolo[2,3-c]pyridin-2(3H)-one (3u).**

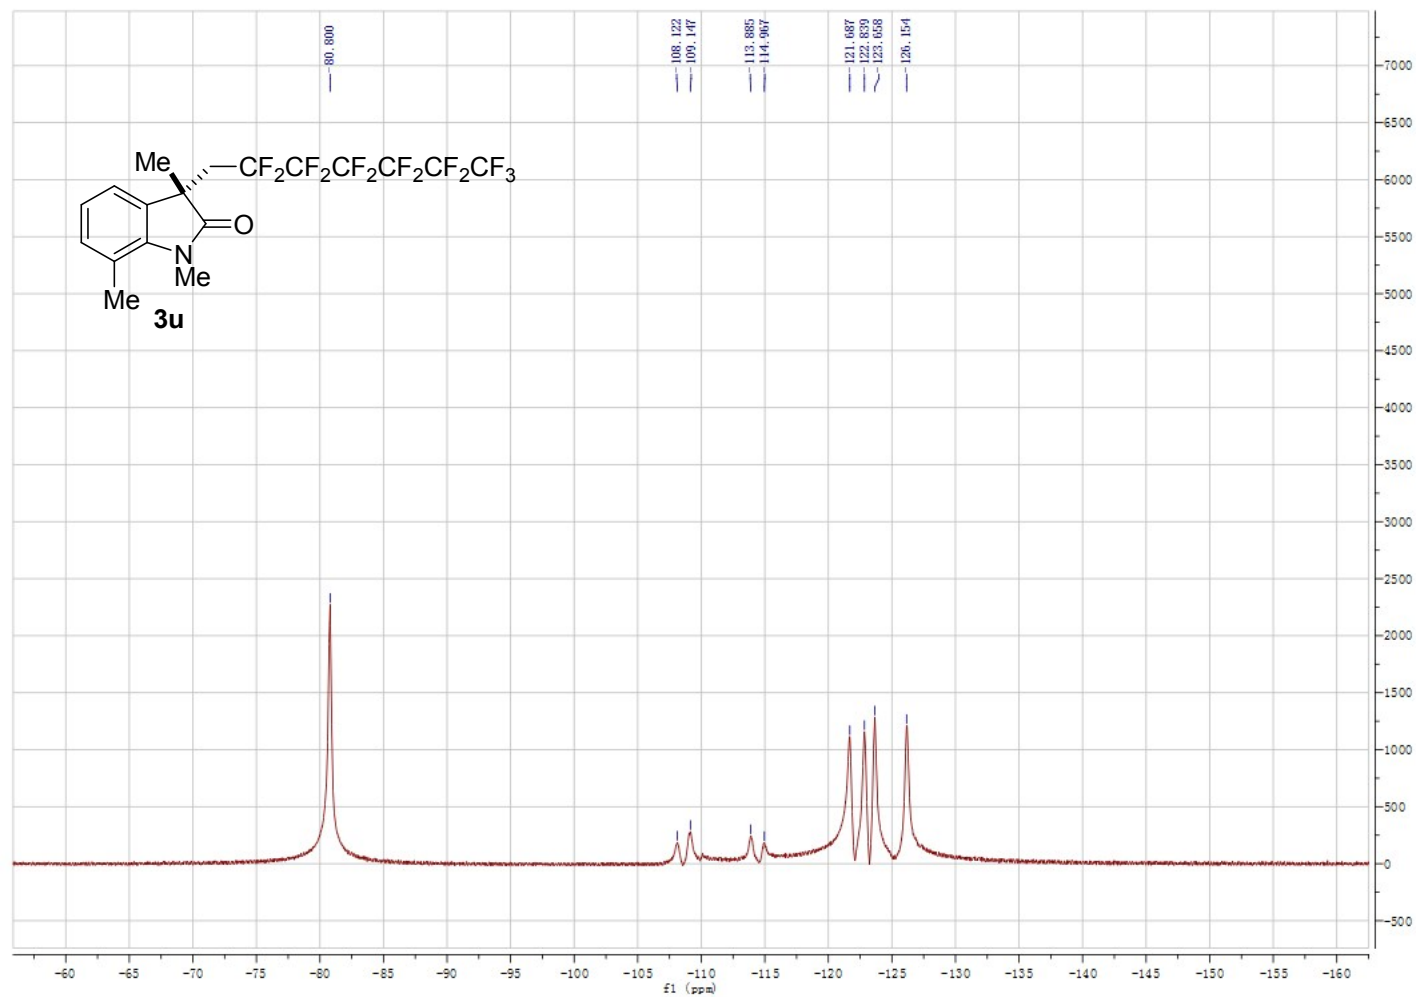

**3-(2,2,3,3,4,4,5,5,6,6,7,7,8,8,9,9,9-heptafluorononyl)-1,3,7-trimethylindolin-2-one (3v)**







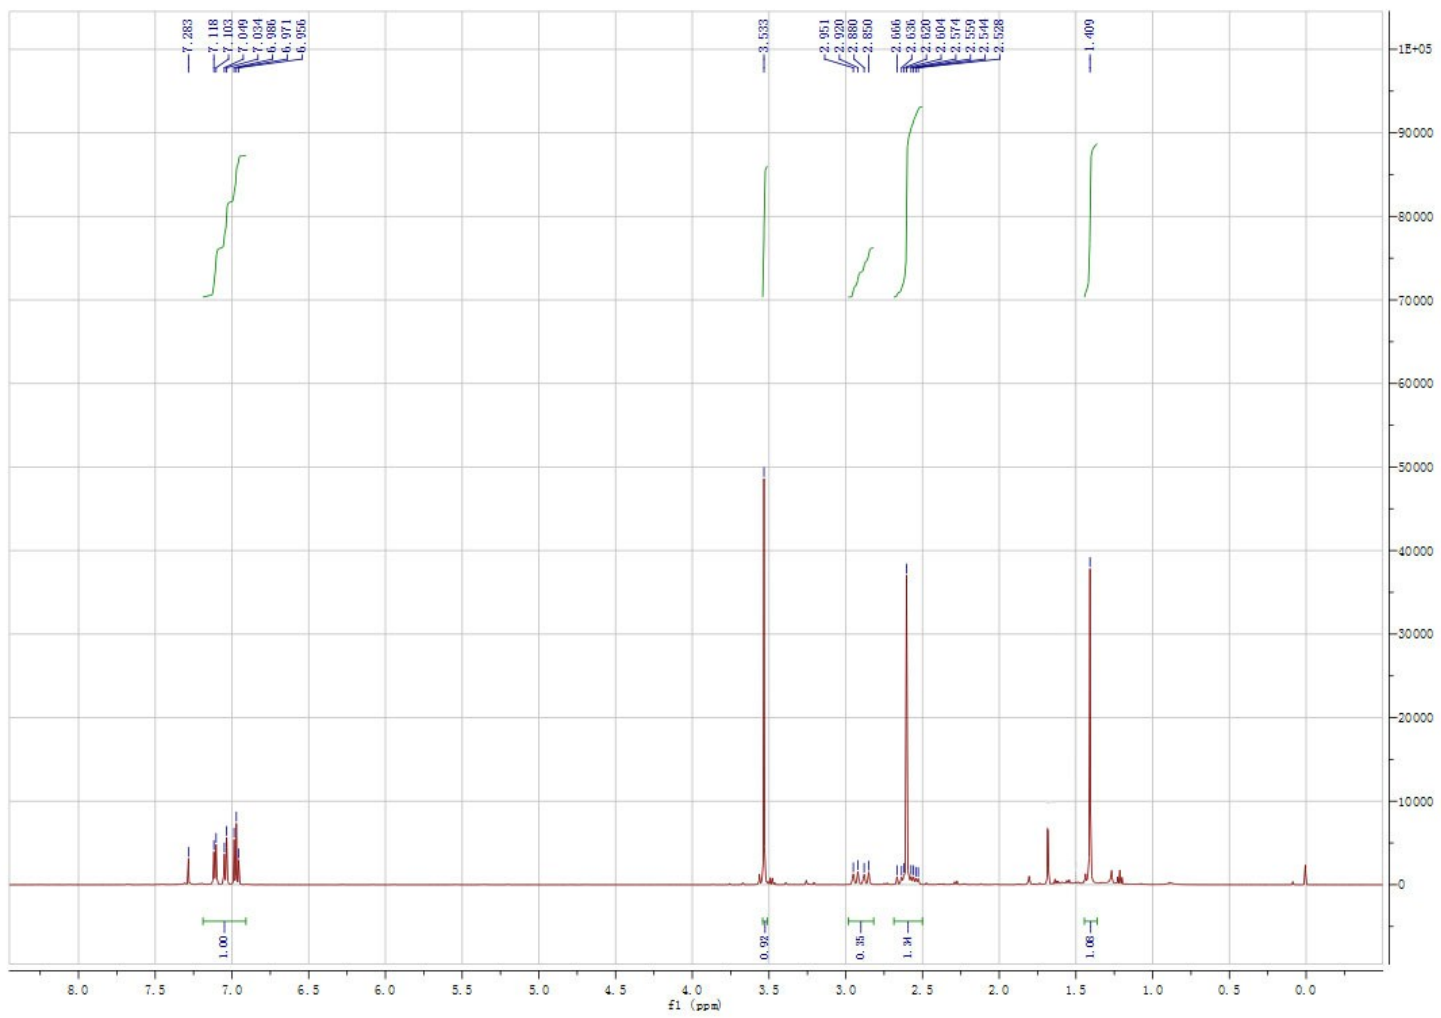

3-(2,2,3,3,4,4,5,5,6,6,7,7,8,8,9,9,9-heptafluorononyl)-1,3,7-trimethylindolin-2-one (3w)

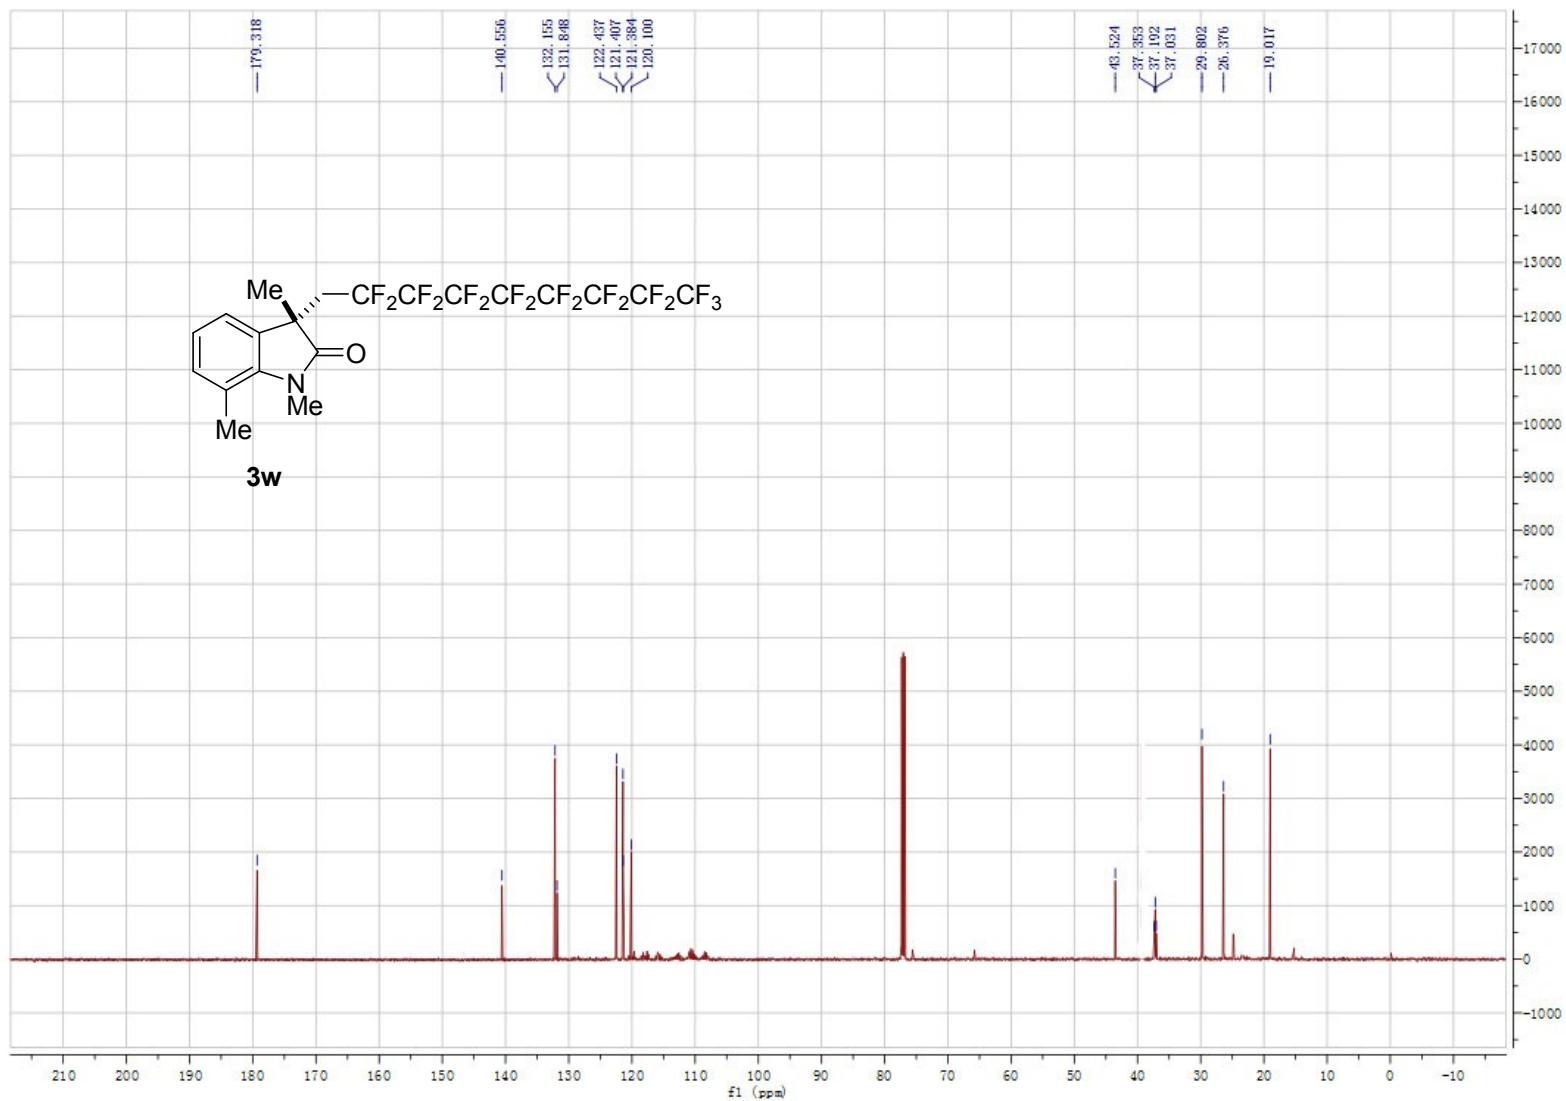

3-(2,2,3,3,4,4,5,5,6,6,7,7,8,8,9,9,9-heptafluorononyl)-1,3,7-trimethylindolin-2-one (3w)

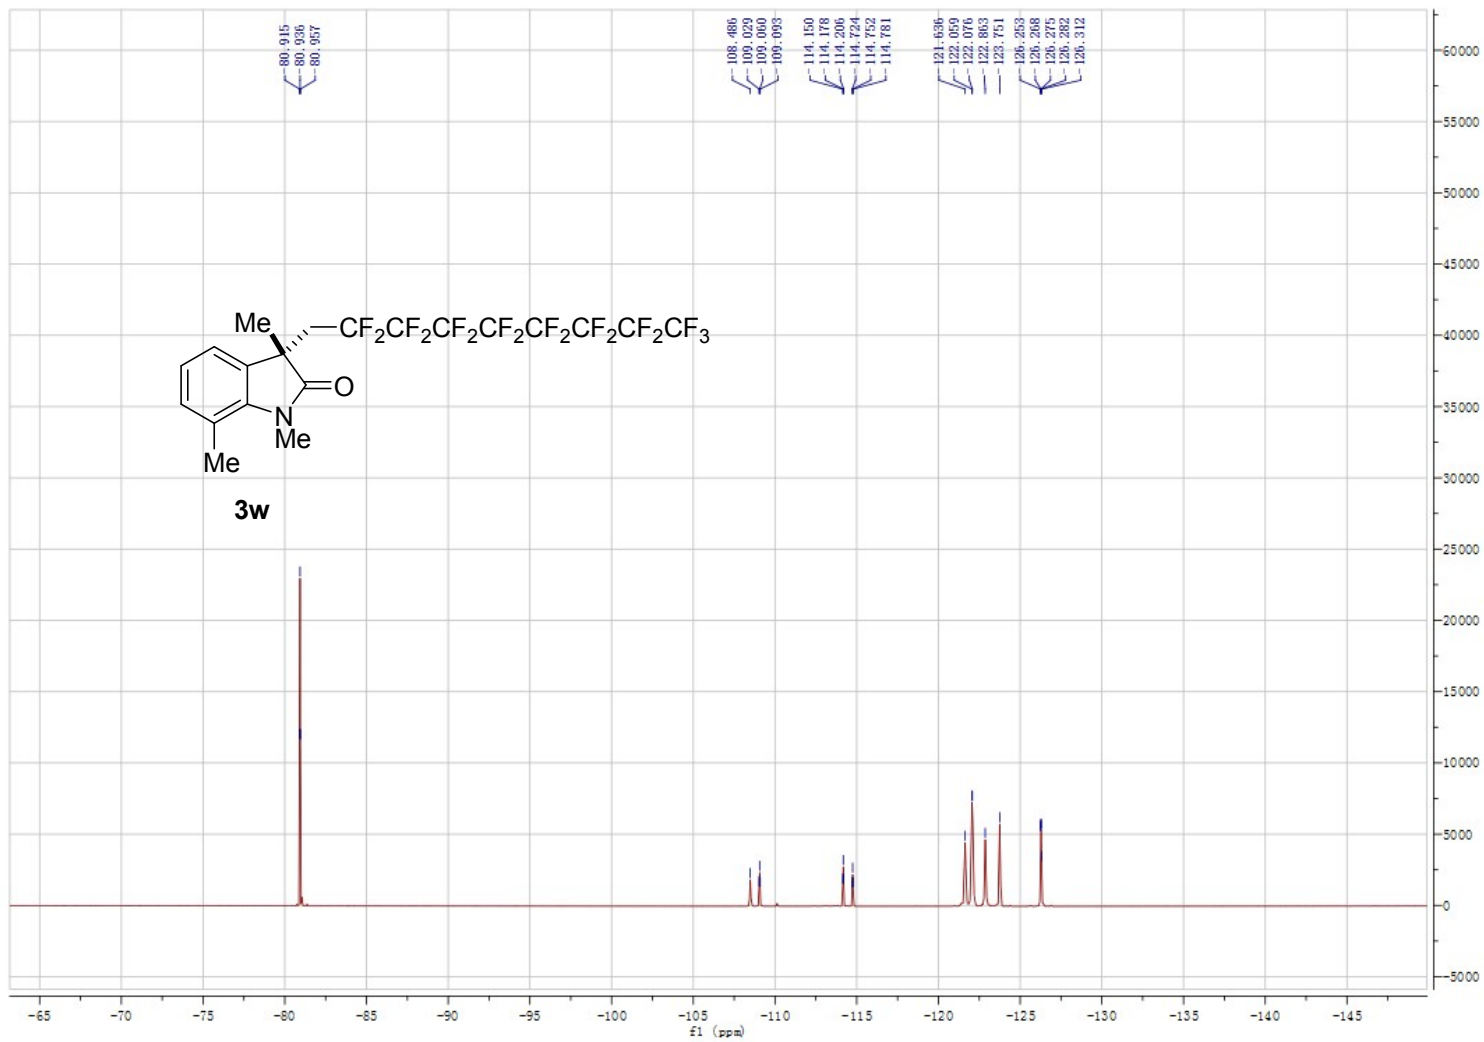

3-(2,2,3,3,4,4,5,5,6,6,7,7,8,8,9,9,10,10,11,11,11-henicosafluoroundecyl)-1,3-dimethyl-5-(trifluoromethyl)indolin-2-one (3x)

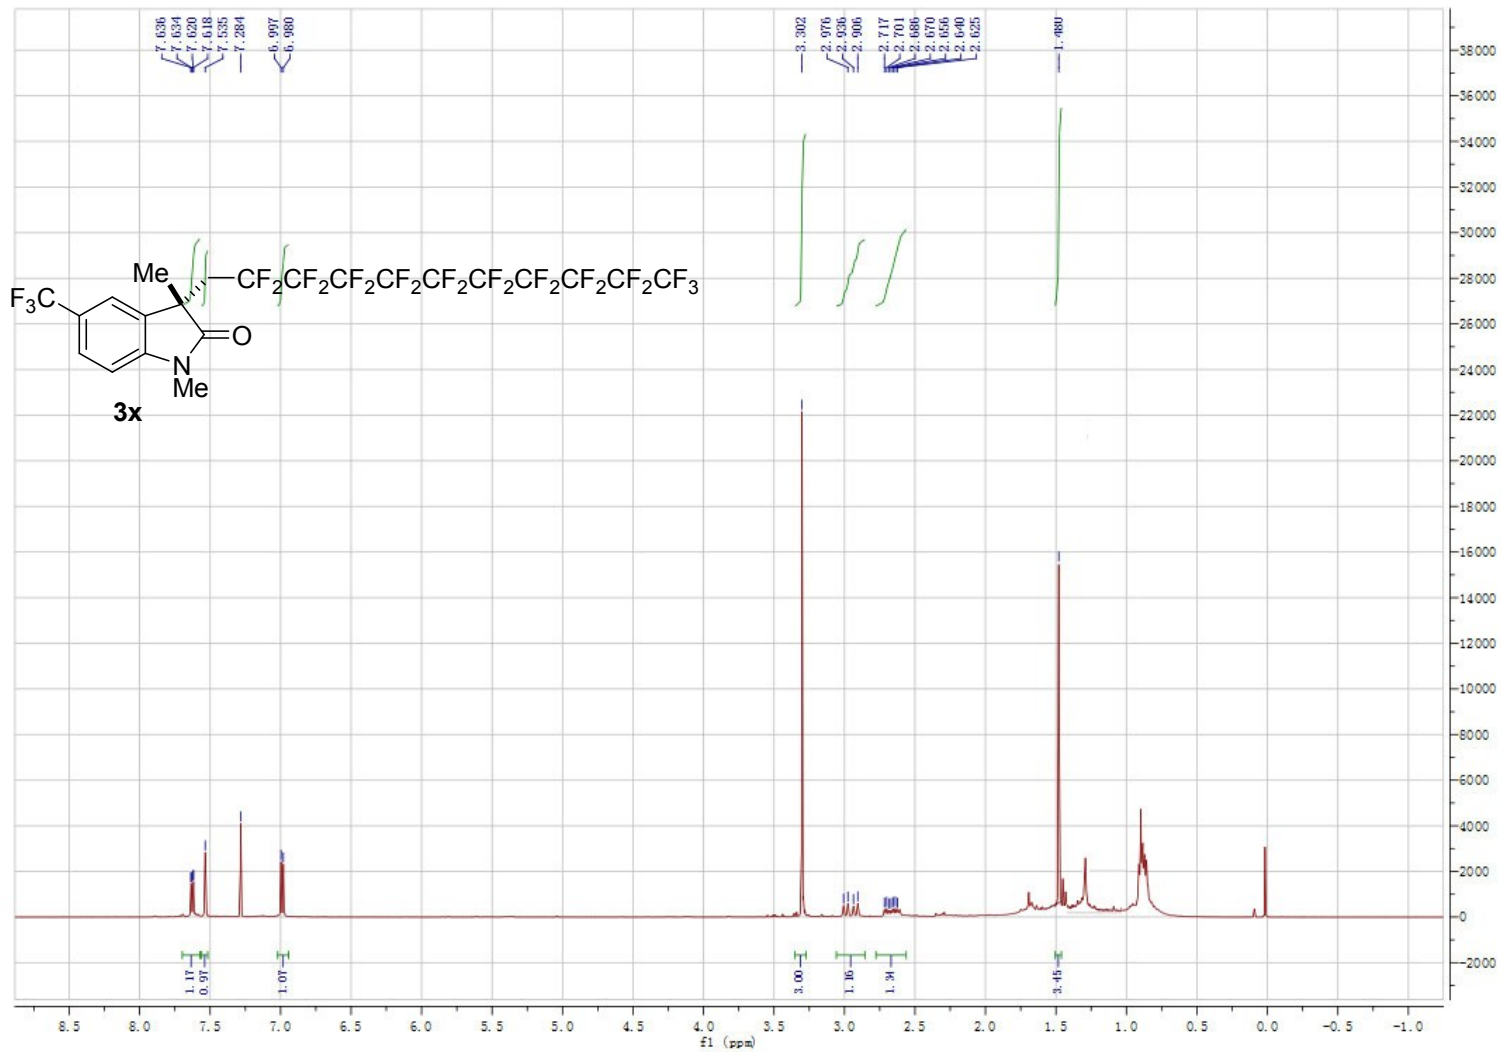



3-(2,2,3,3,4,4,5,5,6,6,7,7,8,8,9,9,10,10,11,11,11-henicosafuoroundecyl)-1,3-dimethyl-5-(trifluoromethyl)indolin-2-one (3x)

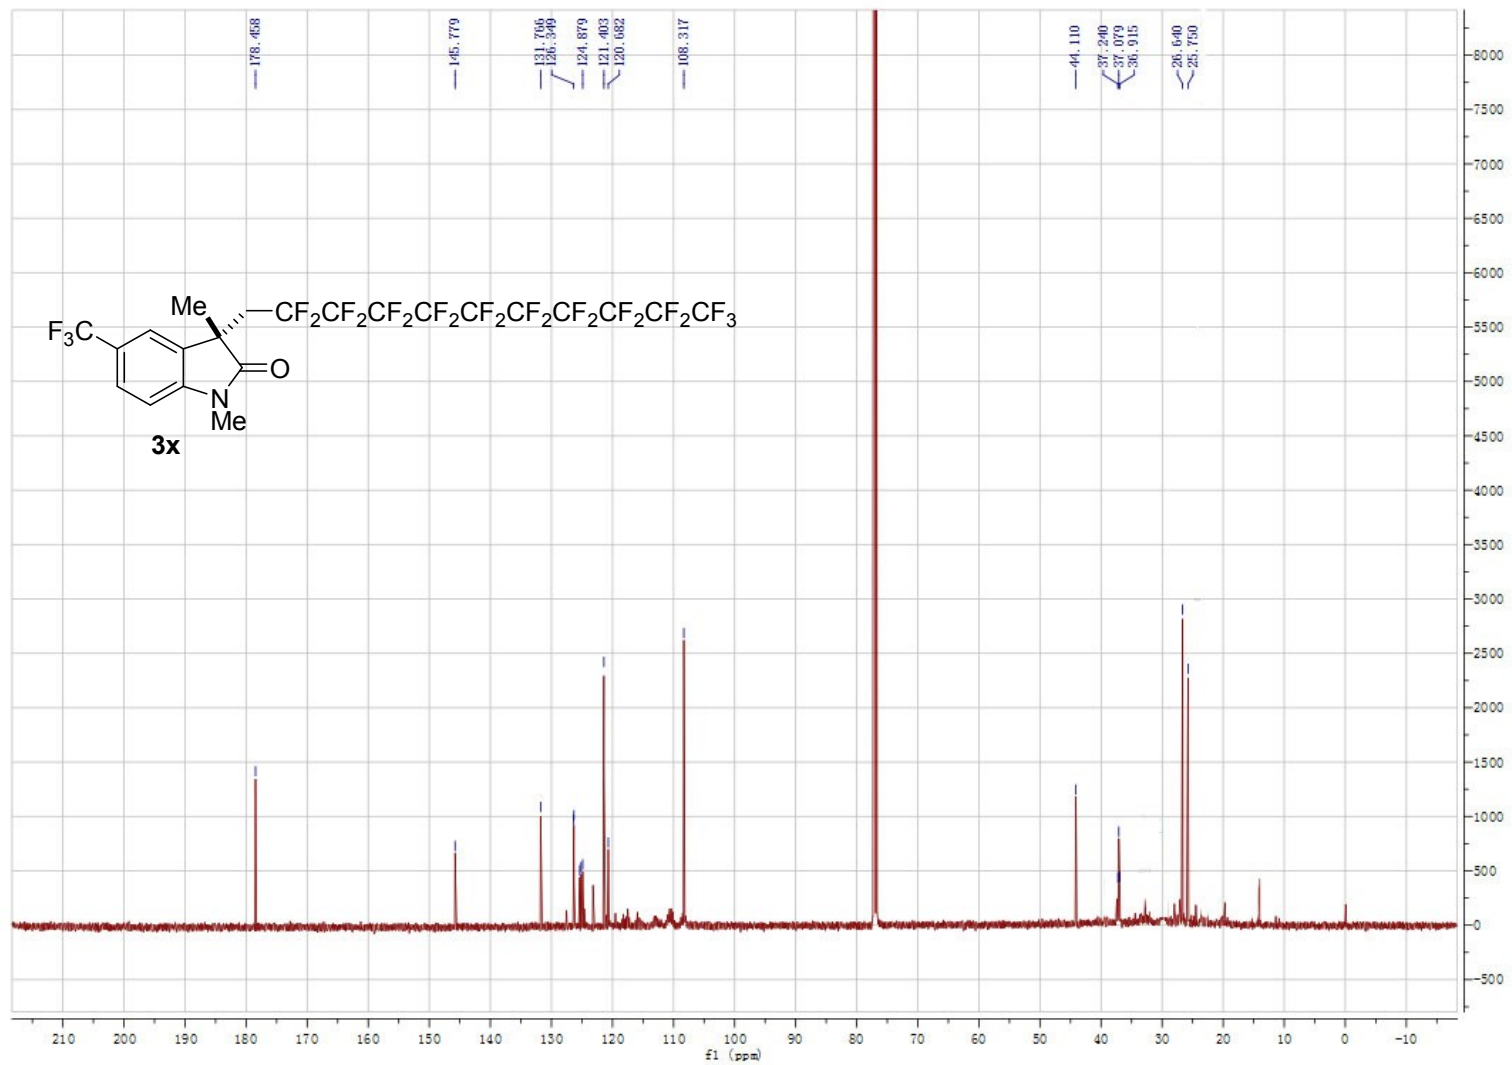

3-(2,2,3,3,4,4,5,5,6,6,7,7,8,8,9,9,10,10,11,11,11-henicosaflluoroundecyl)-1,3-dimethyl-5-(trifluoromethyl)indolin-2-one (3x)

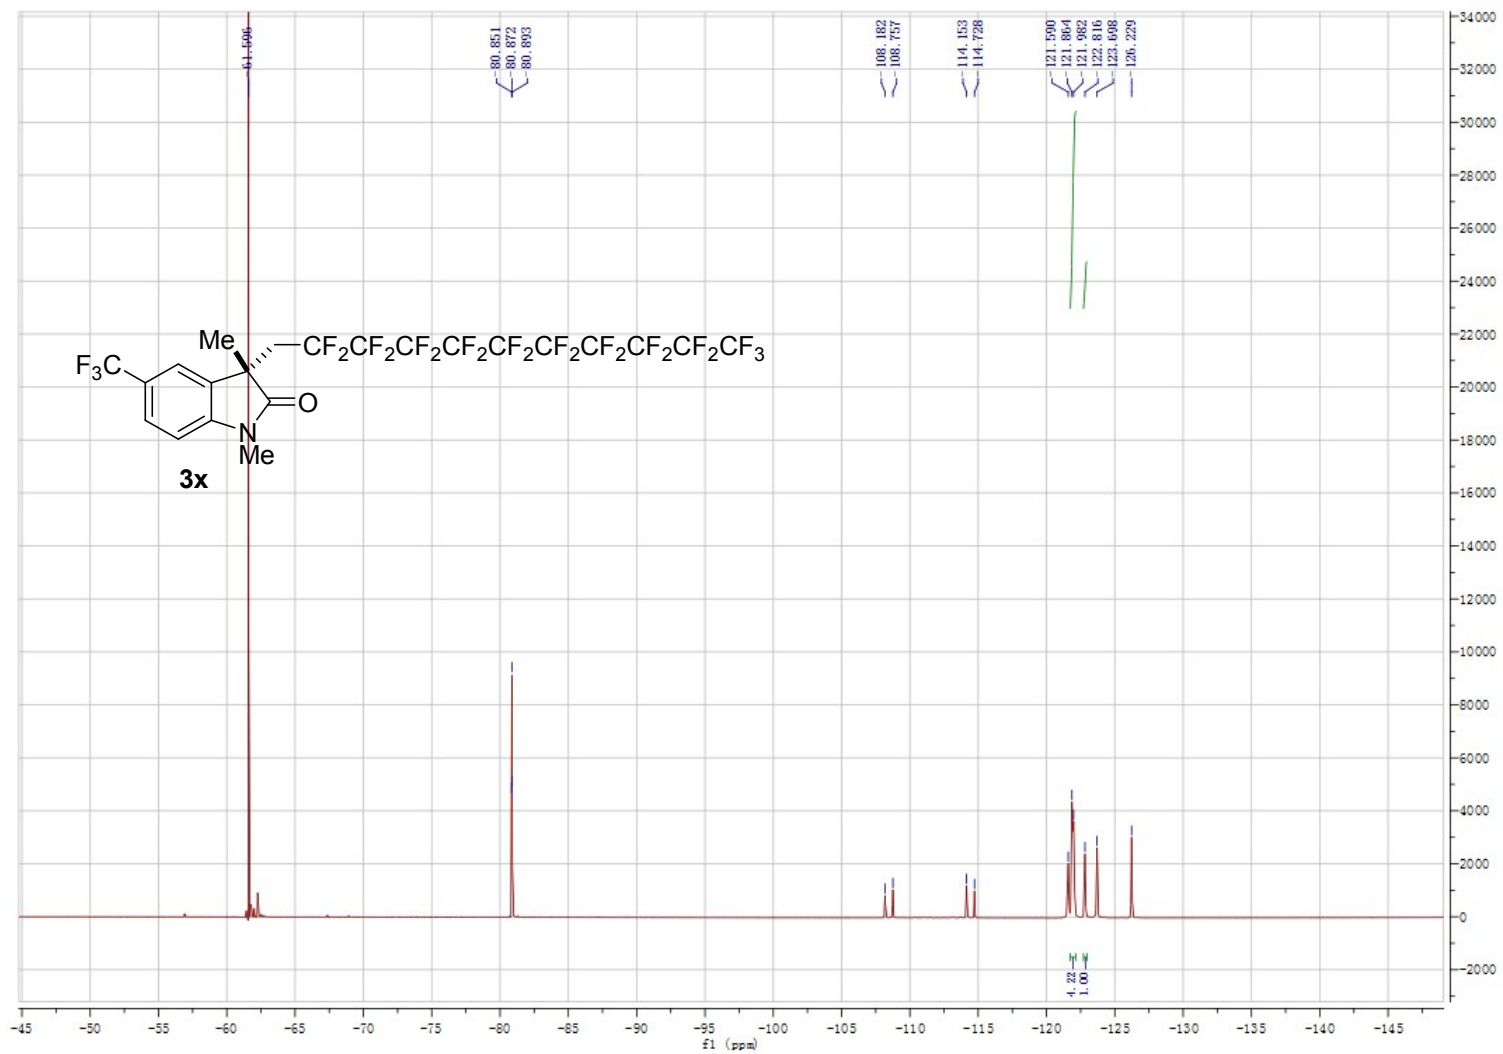

Supplement: c5ob00454c1.pdf [file c5ob00454c1.pdf]
